# Supplementary material for: Regioselective synthesis of arylsulfonyl heterocycles from bromoallyl sulfones via intramolecular Heck coupling reaction
Source: Royal Society of Chemistry journal article supplement (doi:10.1039/d0ob01623c), 2020-01-01

Supporting Information for

## **Regioselective synthesis of arylsulfonyl heterocycles from bromoallyl sulfones via intramolecular Heck coupling reaction**

Deepak Yadav,<sup>a</sup> Krishna<sup>b</sup>, Sunil K. Sharma<sup>b</sup> and Rajeev S. Menon<sup>a\*</sup>

<sup>a</sup>*Department of Chemistry, Central University of Haryana, Mahendergarh, Haryana 123029, India. E-mail: rajeevmenon@cuh.ac.in*

<sup>b</sup>*Department of Chemistry, University of Delhi, Delhi 110007, India.*

### **General Information**

Solvents and reagents: All the reagents were used without further purification unless specified otherwise. Technical grade ethyl acetate and petroleum ether used for column chromatography were distilled prior to use. All reactions were performed in oven-dried glassware with magnetic stirring. HPLC grade acetonitrile and DMF were used as purchased.

Purification and chromatography: TLC analysis was performed on commercially prepared 60 F<sub>254</sub> silica gel plates. Visualization of spots on TLC plate was accomplished with UV light (254 nm) and staining by KMnO<sub>4</sub> solution. Column chromatography was carried out using silica gel (60-120 mesh and 100- 200 mesh) packed in glass columns using distilled ethyl acetate and petroleum ether.

Characterisation: All <sup>1</sup>H NMR (400 MHz) and <sup>13</sup>C NMR (100 MHz) spectra were recorded in CDCl<sub>3</sub> solvent at ambient temperature, chemical shift  $\delta$  are given in ppm on a scale downfield from TMS, and the coupling constant *J* are in Hz. The signal patterns are indicated as follows: s, Singlet; d, doublet; t, triplet; dd, doublet of doublet; m, multiplet; brs = broad, AB q, AB quartet). IR spectra were recorded on a Bruker Alfa FTIR spectrometer by dispersing samples in KBr pellets. Melting points were recorded on an electrothermal apparatus and are uncorrected.

The 2-bromoallylsulfones **4a-b**,<sup>1</sup> sulfonamides **6a-j**<sup>2</sup> and **14a-b**<sup>3</sup> were prepared as described previously.

**General procedure A: Preparation of N-vinyl-o-halo sulfonamides 7a-j, enol ethers 11a-b and N-vinyl sulfonamides 15a-b**

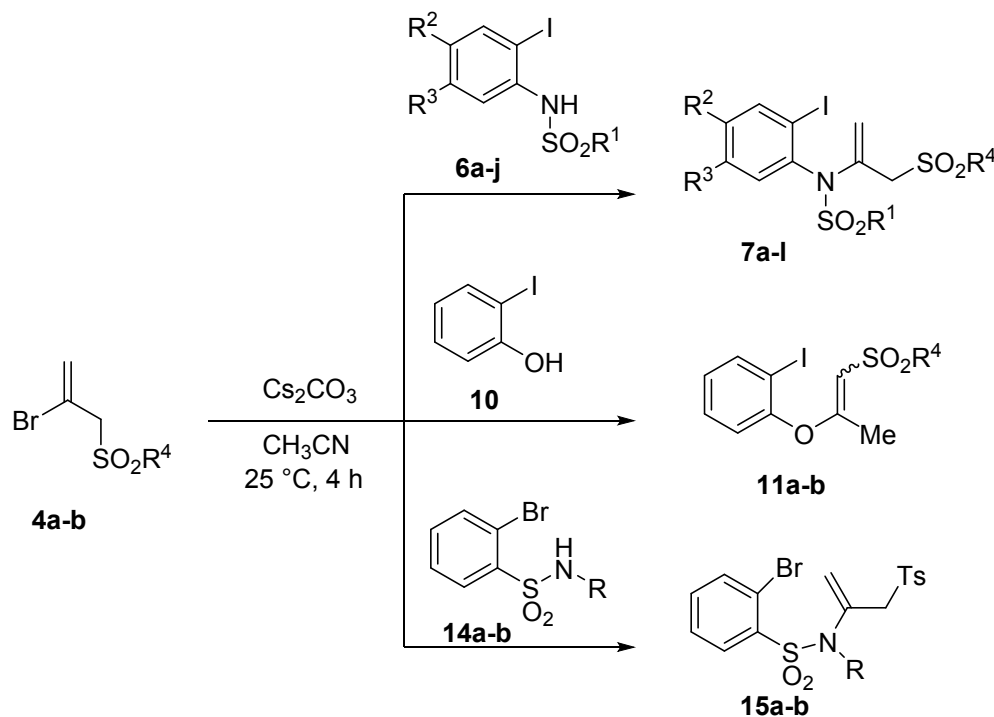

To a solution of the nucleophile (1.0 mmol) (N-sulfonyl-o-iodoaniline **6** or 2-iodophenol **10** or 2-bromobenzenesulfonamides **14**) and 2-bromoallyl sulfone **4** (1.5 mmol) in acetonitrile (10 mL), cesium carbonate (815 mg, 2.5 mmol) was added at room temperature and stirred the mixture for 4 hours. After completion of reaction, solvent was removed on a rotavapor and deionized water (20 mL) was added. The solution was extracted with ethyl acetate (3 X 15 mL). The combined extracts was washed with brine, dried over anhydrous sodium sulfate and concentrated on a rotavapor. Column chromatography of the residue on silica gel using petroleum ether-ethyl acetate as eluent afforded analytically pure products.

**Spectroscopic data for N-vinyl-o-iodo sulfonamides 7a-j**

<sup>1</sup> S. Undeela, S. Thadkapally, J. B. Nanubolu, K. K. Singarapu and R. S. Menon, *Chem. Commun.*, 2015, **51**, 13748-13751.

<sup>2</sup> C. Rossy, E. Fouquet and F.-X. Felpin, *Beilstein J. Org. Chem.*, 2013, **9**, 1426-1431.

<sup>3</sup> S. Debnath and S. Mondal, *J. Org. Chem.*, 2015, **80**, 3940-3948.

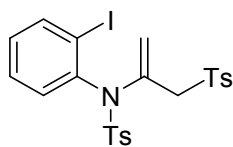

*N*-(2-iodophenyl)-4-methyl-*N*-(3-tosylprop-1-en-2-yl)benzenesulfonamide (**7a**)

White solid, 448 mg, 79%

**Melting point:** 131-133 °C

**IR (KBr)**  $\nu_{\text{max}}$ : 2922, 1620, 1595, 1460, 1346, 1311, 1157, 655, 586  $\text{cm}^{-1}$

**$^1\text{H}$  NMR** (400 MHz,  $\text{CDCl}_3$ )  $\delta$  7.83 (d,  $J = 8.0, 1.2$  Hz, 1H), 7.72 (d,  $J = 8.4$  Hz, 2H), 7.56 (d,  $J = 8.4$  Hz, 2H), 7.34-7.21 (m, 4H), 7.22 (d,  $J = 8.0$  Hz, 2H), 7.05 (ddd,  $J = 8.0, 6.9, 2.2$  Hz, 1H), 5.53 (d,  $J = 1.2$  Hz, 1H), 5.29 (d,  $J = 1.2$  Hz, 1H), 3.84 (AB q,  $J = 15.2$  Hz, 2H), 2.45 (s, 3H), 2.42 (s, 3H).

**$^{13}\text{C}$  NMR** (100 MHz,  $\text{CDCl}_3$ )  $\delta$  144.8, 144.5, 140.9, 140.0, 136.1, 135.1, 133.5, 132.5, 130.5, 129.7, 129.6, 129.2, 128.9, 128.7, 118.9, 102.3, 59.7, 21.7

**HRMS** calcd for  $\text{C}_{23}\text{H}_{22}\text{INO}_4\text{S}_2$  (M+H) 568.0113 ; found 568.0116.

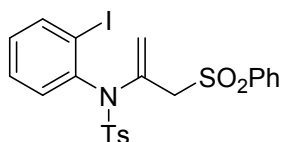

*N*-(2-iodophenyl)-4-methyl-*N*-(3-(phenylsulfonyl)prop-1-en-2-yl)benzenesulfonamide (**7b**)

Colorless oil, 448 mg, 81%

**IR (KBr)**  $\nu_{\text{max}}$ : 3062, 2924, 1591, 1496, 1315, 1153, 526  $\text{cm}^{-1}$

**$^1\text{H}$  NMR** (400 MHz,  $\text{CDCl}_3$ )  $\delta$  7.84 (dd,  $J = 8.0, 1.2$  Hz, 1H), 7.72-7.69 (m, 4H), 7.62-7.58 (m, 1H), 7.46 (t,  $J = 7.8$  Hz, 2H), 7.36-7.29 (m, 4H), 7.05 (ddd,  $J = 8.0, 6.8, 2.0$  Hz, 1H), 5.53 (d,  $J = 1.2$  Hz, 1H), 5.28 (d,  $J = 1.2$  Hz, 1H), 3.86 (AB q,  $J = 15.6$  Hz, 2H), 2.45 (s, 3H)

**$^{13}\text{C}$  NMR** (100 MHz,  $\text{CDCl}_3$ )  $\delta$  144.5, 141.0, 139.9, 138.1, 136.1, 133.9, 133.3, 132.5, 130.6, 129.6, 129.2, 129.1, 128.9, 128.7, 118.8, 102.2, 59.7, 21.7

**HRMS** calcd for  $\text{C}_{22}\text{H}_{20}\text{INO}_4\text{S}_2$  (M+H) 553.9957 ; found 553.9977

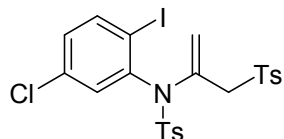

*N*-(5-chloro-2-iodophenyl)-4-methyl-*N*-(3-tosylprop-1-en-2-yl)benzenesulfonamide (**7c**)

White solid, 499 mg, 83%

**Melting point:** 123-125 °C

**IR (KBr)**  $\nu_{\max}$ : 3244, 2924, 1620, 1595, 1448, 1309, 1157, 586, 516

**<sup>1</sup>H NMR** (400 MHz, CDCl<sub>3</sub>)  $\delta$  7.73 (t,  $J$  = 8.4 Hz, 3H), 7.57 (d,  $J$  = 8.4 Hz, 2H), 7.33 (d,  $J$  = 8.0 Hz, 2H), 7.24 (d,  $J$  = 8.0 Hz, 2H), 7.14 (d,  $J$  = 2.4 Hz, 1H), 7.04 (dd,  $J$  = 8.4, 2.4 Hz, 1H), 5.55 (d,  $J$  = 1.2 Hz, 1H), 5.43 (d,  $J$  = 1.2 Hz, 1H), 3.85 (AB q,  $J$  = 15.6 Hz, 2H), 2.46 (s, 3H), 2.42 (s, 3H).

**<sup>13</sup>C NMR** (100 MHz, CDCl<sub>3</sub>)  $\delta$  145.0, 144.8, 141.3, 141.2, 135.7, 135.2, 134.9, 133.4, 132.2, 130.7, 129.8, 129.7, 128.9, 128.6, 119.7, 99.9, 59.9, 21.8, 21.7

**HRMS** calcd for C<sub>23</sub>H<sub>21</sub>ClINO<sub>4</sub>S<sub>2</sub> (M+H) 601.9723; found 601.9737.

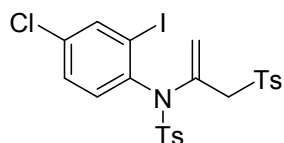

*N*-(4-chloro-2-iodophenyl)-4-methyl-*N*-(3-tosylprop-1-en-2-yl)benzenesulfonamide (**7d**)

White solid, 469 mg, 78%

**Melting point:** 119-120 °C

**IR (KBr)**  $\nu_{\max}$ : 3091, 1597, 1577, 1463, 1334, 1163, 578

**<sup>1</sup>H NMR** (400 MHz, CDCl<sub>3</sub>)  $\delta$  7.77 (d,  $J$  = 2.4 Hz, 1H), 7.71 (d,  $J$  = 8.4 Hz, 2H), 7.54 (d,  $J$  = 8.4 Hz, 2H), 7.33-7.28 (m, 3H), 7.23-7.19 (m, 3H), 5.55 (d,  $J$  = 1.2 Hz, 1H), 5.37 (d,  $J$  = 1.2 Hz, 1H), 3.81 (s, 2H), 2.46 (s, 3H), 2.43 (s, 3H).

**<sup>13</sup>C NMR** (100 MHz, CDCl<sub>3</sub>)  $\delta$  145.0, 144.7, 140.2, 138.6, 135.9, 135.6, 134.9, 133.2, 132.7, 129.7, 129.6, 129.3, 128.9, 128.7, 120.0, 102.7, 59.6, 21.7

**HRMS** calcd for C<sub>23</sub>H<sub>21</sub>ClINO<sub>4</sub>S<sub>2</sub> (M+H) 601.9723 ; found 601.9748.

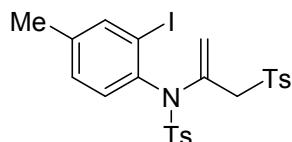

*N*-(2-iodo-4-methylphenyl)-4-methyl-*N*-(3-tosylprop-1-en-2-yl)benzenesulfonamide (**7e**)

White solid, 442 mg, 76%

**Melting point:** 116-117 °C

**IR (KBr)**  $\nu_{\text{max}}$ : 3041, 2924, 1624, 1595, 1477, 1319, 1159, 509  $\text{cm}^{-1}$

**<sup>1</sup>H NMR** (400 MHz,  $\text{CDCl}_3$ )  $\delta$  7.71 (d,  $J = 8.4$  Hz, 2H), 7.64 (s, 1H), 7.55 (d,  $J = 8.0$  Hz, 2H), 7.31 (d,  $J = 8.0$  Hz, 2H), 7.22 (d,  $J = 8.4$  Hz, 2H), 7.16-7.10 (m, 2H), 5.52 (s, 1H), 5.25 (s, 1H), 3.82 (s, 2H), 2.45 (s, 3H), 2.42 (s, 3H), 2.31 (s, 3H)

**<sup>13</sup>C NMR** (100 MHz,  $\text{CDCl}_3$ )  $\delta$  144.8, 144.4, 141.3, 141.1, 137.2, 136.2, 135.1, 133.5, 131.9, 130.0, 129.6, 129.5, 128.9, 128.7, 118.6, 102.0, 59.6, 21.7, 20.7

**HRMS** calcd for  $\text{C}_{24}\text{H}_{24}\text{INO}_4\text{S}_2$  (M+H) 582.0270 ; found 582.0284.

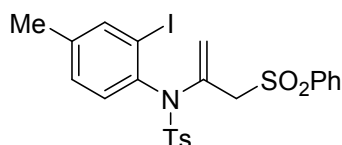

*N*-(2-iodo-4-methylphenyl)-4-methyl-*N*-(3-(phenylsulfonyl)prop-1-en-2-yl)benzenesulfonamide (**7f**)

White solid, 419 mg, 74%

**Melting point:** 119-121 °C

**IR (KBr)**  $\nu_{\text{max}}$ : 3040, 2922, 1620, 1585, 1440, 1307, 1153, 547  $\text{cm}^{-1}$

**<sup>1</sup>H NMR** (400 MHz,  $\text{CDCl}_3$ )  $\delta$  7.72-7.69 (m, 4H), 7.65 (d,  $J = 1.2$  Hz, 1H), 7.60 (t,  $J = 7.6$  Hz, 1H), 7.45 (t,  $J = 7.6$  Hz, 2H), 7.31 (d,  $J = 8.0$  Hz, 2H), 7.16 (d,  $J = 8.0$  Hz, 1H), 7.12 (d,  $J = 8.0$ , 1.6 Hz, 1H), 5.52 (d,  $J = 1.2$  Hz, 1H), 5.24 (d,  $J = 1.2$  Hz, 1H), 3.85 (AB q,  $J = 15.2$  Hz, 2H), 2.45 (s, 3H), 2.31 (s, 3H)

**<sup>13</sup>C NMR** (100 MHz,  $\text{CDCl}_3$ )  $\delta$  144.4, 141.4, 141.1, 138.1, 137.1, 136.2, 133.8, 133.4, 131.9, 130.0, 129.5, 129.0, 128.9, 128.8, 118.4, 101.9, 59.7, 21.7, 20.6

**HRMS** calcd for  $\text{C}_{23}\text{H}_{22}\text{INO}_4\text{S}_2$  (M+H) 568.0114 ; found 568.0131.

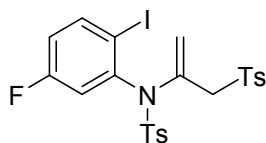

*N*-(5-fluoro-2-iodophenyl)-4-methyl-*N*-(3-tosylprop-1-en-2-yl)benzenesulfonamide (**7g**)

White solid, 416 mg, 71%

**Melting point:** 114-115 °C

**IR (KBr)**  $\nu_{\max}$ : 3099, 1589, 1460, 1354, 1292, 1159, 815, 580, 518  $\text{cm}^{-1}$

**$^1\text{H}$  NMR** (400 MHz,  $\text{CDCl}_3$ )  $\delta$  7.78 (dd,  $J = 8.8, 6.0$  Hz, 1H), 7.73 (d,  $J = 8.4$  Hz, 2H), 7.57 (d,  $J = 8.4$  Hz, 2H), 7.33 (d,  $J = 8.0$  Hz, 2H), 7.24 (d,  $J = 8.0$  Hz, 2H), 6.99 (dd,  $J = 8.8, 3.2$  Hz, 1H), 6.85 (ddd,  $J = 8.8, 7.6, 3.2$  Hz, 1H), 5.53 (s,  $J = 1.6$  Hz, 1H), 5.35 (s,  $J = 1.6$  Hz, 1H), 3.84 (AB q,  $J = 15.6$  Hz, 2H), 2.46 (s, 3H), 2.42 (s, 3H)

**$^{13}\text{C}$  NMR** (100 MHz,  $\text{CDCl}_3$ )  $\delta$  162.7 (d,  $J = 251.2$  Hz), 144.9 (d,  $J = 20.9$  Hz), 141.4, 141.3 (d,  $J = 8.3$  Hz), 135.8, 135.1, 133.4, 129.8, 129.7, 128.9, 128.7, 119.8 (d,  $J = 22.8$  Hz), 119.3, 118.2 (d,  $J = 21.6$  Hz), 95.7 (d,  $J = 3.9$  Hz), 59.9, 21.8, 21.7.

**HRMS** calcd for  $\text{C}_{23}\text{H}_{21}\text{FINO}_4\text{S}_2$  (M+H) 586.0019 ; found 586.0026,

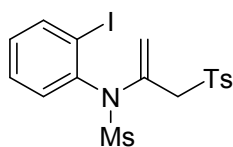

*N*-(2-iodophenyl)-*N*-(3-tosylprop-1-en-2-yl)methanesulfonamide (**7h**) [Spectroscopic data is in agreement with the previous report]<sup>4</sup>

White solid, 354 mg, 72%

**Melting point:** 133-135 °C (Lit. 134-136 °C)<sup>10b</sup>

**IR (KBr)**  $\nu_{\max}$ : 2922, 1629, 1595, 1462, 1334, 1309, 1286, 1147, 765, 516  $\text{cm}^{-1}$

**$^1\text{H}$  NMR** (400 MHz,  $\text{CDCl}_3$ )  $\delta$  7.91 (d,  $J = 8.0$  Hz, 1H), 7.76 (d,  $J = 8.0$  Hz, 2H), 7.61 (d,  $J = 8.0$  Hz, 1H), 7.44 (t,  $J = 8.0$  Hz, 1H), 7.34 (d,  $J = 8.4$  Hz, 2H), 7.09 (t,  $J = 7.6$  Hz, 1H), 5.83 (s, 1H), 5.11 (s, 1H), 3.66 (AB q,  $J = 15.2$  Hz, 2H), 3.38 (s, 1H), 2.44 (s, 3H)

**$^{13}\text{C}$  NMR** (100 MHz,  $\text{CDCl}_3$ )  $\delta$  145.3, 141.0, 139.6, 135.4, 132.7, 132.5, 130.8, 130.0, 129.6, 128.5, 116.9, 102.3, 59.7, 41.2, 21.7.

**HRMS** calcd for  $\text{C}_{17}\text{H}_{18}\text{INO}_4\text{S}_2$  (M+H) 491.9800; found 491.9811.

<sup>4</sup> S. Undeela, G. Ravikumar, J. B. Nanubolu, K. K. Singarapu and R. S. Menon, *Chem. Commun.*, 2016, **52**, 4824-4827.

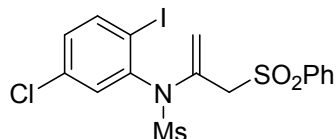

*N*-(5-chloro-2-iodophenyl)-*N*-(3-(phenylsulfonyl)prop-1-en-2-yl)methanesulfonamide (**7i**)

Pale yellow oil, 399 mg, 78%

**IR (KBr)**  $\nu_{\max}$ : 2931, 1579, 1469, 1315, 1149, 746, 518  $\text{cm}^{-1}$

**$^1\text{H}$  NMR** (400 MHz,  $\text{CDCl}_3$ )  $\delta$  7.88-7.86 (m, 3H), 7.67 (t,  $J = 7.6$  Hz, 1H), 7.58-7.51 (m, 3H), 7.42-7.39 (m, 1H), 5.84 (s, 1H), 5.16 (s, 1H), 3.68 (AB q,  $J = 15.2$  Hz, 2H), 3.37 (s, 3H)

**$^{13}\text{C}$  NMR** (100 MHz,  $\text{CDCl}_3$ )  $\delta$  140.3, 138.4, 138.3, 136.0, 134.3, 132.9, 132.4, 129.9, 129.5, 128.5, 117.5, 102.5, 59.6, 41.3.

**HRMS** calcd for  $\text{C}_{16}\text{H}_{15}\text{ClINO}_4\text{S}_2$  (M+H) 511.9254; found 511.9250.

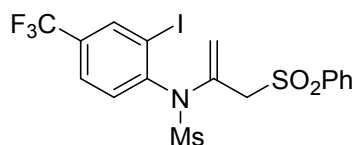

*N*-(2-iodo-4-(trifluoromethyl)phenyl)-*N*-(3-(phenylsulfonyl)prop-1-en-2-yl)methanesulfonamide (**7j**)

Brown viscous oil, 371 mg, 68%

**Melting point:** **IR (KBr)**  $\nu_{\max}$ : 2933, 1600, 1446, 1315, 1126, 524  $\text{cm}^{-1}$

**$^1\text{H}$  NMR** (400 MHz,  $\text{CDCl}_3$ )  $\delta$  8.13 (s, 1H), 7.87 (d,  $J = 7.6$  Hz, 2H), 7.73-7.64 (m, 3H), 7.56 (t,  $J = 7.6$  Hz, 2H), 5.88 (s, 1H), 5.21 (s, 1H), 3.67 (AB q,  $J = 15.2$  Hz, 2H), 3.40 (s, 3H)

**$^{13}\text{C}$  NMR** (100 MHz,  $\text{CDCl}_3$ )  $\delta$  143.1, 138.3, 137.9 (q,  $J = 3.7$  Hz), 134.4, 132.7, 132.5 (q,  $J = 33.2$  Hz), 132.2, 129.5, 128.4, 126.6, (q,  $J = 3.3$  Hz), 123.7, 121.0, 118.0, 102.3, 59.7, 41.5.

**HRMS** calcd for  $\text{C}_{17}\text{H}_{15}\text{F}_3\text{INO}_4\text{S}_2$  (M+H) 545.9518; found 545.9517.

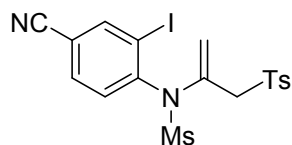

*N*-(4-cyano-2-iodophenyl)-*N*-(3-tosylprop-1-en-2-yl)methanesulfonamide (**7k**)

Yellow solid, 325 mg, 63%

**Melting point:** 116-117  $^{\circ}\text{C}$

**IR (KBr)**  $\nu_{\max}$ : 2924, 2233, 1629, 1595, 1469, 1315, 1149, 513  $\text{cm}^{-1}$

**$^1\text{H}$  NMR** (400 MHz,  $\text{CDCl}_3$ )  $\delta$  8.16 (s, 1H), 7.73-7.71 (m, 4H), 7.34 (d,  $J = 8.4$  Hz, 2H), 5.88 (s, 1H), 5.20 (s, 1H), 3.61 (AB q,  $J = 15.6$  Hz, 2H), 3.40 (s, 3H), 2.44 (s, 3H)

**$^{13}\text{C}$  NMR** (100 MHz,  $\text{CDCl}_3$ )  $\delta$  145.6, 144.2, 144.0, 135.3, 133.0, 132.9, 132.1, 130.1, 128.4, 118.1, 116.2, 114.6, 102.6, 59.8, 41.5, 21.8.

**HRMS** calcd for  $\text{C}_{18}\text{H}_{17}\text{IN}_2\text{O}_4\text{S}_2$  (M+H) 516.9753; found 516.9764.

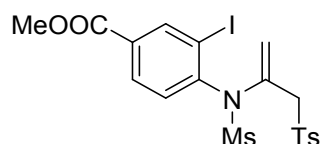

*Methyl-3-iodo-4-(N-(3-tosylprop-1-en-2-yl)methylsulfonamido)benzoate (7I)*

Pale yellow solid, 379 mg, 69%

**Melting point:** 132-134  $^{\circ}\text{C}$

**IR (KBr)**  $\nu_{\max}$ : 2927, 1639, 1593, 1429, 1340, 1149, 509  $\text{cm}^{-1}$

**$^1\text{H}$  NMR** (400 MHz,  $\text{CDCl}_3$ )  $\delta$  8.55 (s, 1H), 8.08 (dt,  $J = 8.4, 1.6$  Hz, 1H), 7.74 (d,  $J = 8.0$  Hz, 2H), 7.66 (dd,  $J = 8.4, 1.6$  Hz, 1H), 7.34 (d,  $J = 8.0$  Hz, 2H), 5.88 (s, 1H), 5.20 (s, 1H), 3.94 (s, 3H), 3.65 (AB q,  $J = 15.6$  Hz, 2H), 3.41 (s, 3H), 2.44 (s, 3H).

**$^{13}\text{C}$  NMR** (100 MHz,  $\text{CDCl}_3$ )  $\delta$  164.7, 145.4, 143.7, 142.0, 135.4, 132.3, 132.2, 132.1, 130.6, 130.0, 128.4, 117.6, 101.9, 59.7, 52.8, 21.7.

**HRMS** calcd for  $\text{C}_{19}\text{H}_{20}\text{INO}_6\text{S}_2$  (M+H) 549.9856; found 549.9858.

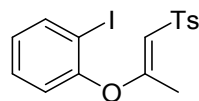

*1-iodo-2-((1-tosylprop-1-en-2-yl)oxy)benzene (11a)*

White solid, 265 mg, 64%

**Melting point:** 136-137  $^{\circ}\text{C}$

**IR (KBr)**  $\nu_{\max}$ : 3068, 1627, 1462, 1284, 1130, 757  $\text{cm}^{-1}$

**$^1\text{H}$  NMR** (400 MHz,  $\text{CDCl}_3$ )  $\delta$  7.91 (d,  $J = 8.4$  Hz, 2H), 7.76 (dd,  $J = 8.0, 1.6$  Hz, 1H), 7.30-7.25 (m, 3H), 6.92-6.88 (m, 1H), 6.85 (dd,  $J = 8.0, 1.2$  Hz, 1H), 5.95 (d,  $J = 0.8$  Hz, 1H), 2.39 (s, 3H), 1.75 (d,  $J = 0.8$  Hz, 3H).



$^{13}\text{C}$  NMR (100 MHz,  $\text{CDCl}_3$ )  $\delta$  161.7, 153.5, 143.8, 139.8, 139.5, 129.8, 129.4, 128.3, 127.1, 121.0, 113.7, 89.4, 21.6, 19.1.

HRMS calcd for  $\text{C}_{16}\text{H}_{15}\text{IO}_3\text{S}$  (M+H) 414.9865; found 414.9887.

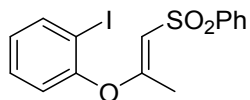

*1-iodo-2-((1-(phenylsulfonyl)prop-1-en-2-yl)oxy)benzene (11b)*

White solid, 268 mg, 67%

**Melting point:** 122-123 °C

**IR (KBr)**  $\nu_{\text{max}}$ : 3070, 2924, 1627, 1458, 1436, 1286, 1126, 752, 567  $\text{cm}^{-1}$

$^1\text{H}$  NMR (400 MHz,  $\text{CDCl}_3$ )  $\delta$  8.03 (d,  $J = 7.6$  Hz, 2H), 7.76 (d,  $J = 8.0$  Hz, 1H), 7.57-7.54 (m, 1H), 7.48 (t,  $J = 7.2$  Hz, 2H), 7.29 (t,  $J = 7.6$  Hz, 1H), 6.92 (t,  $J = 7.6$  Hz, 1H), 6.84 (d,  $J = 8.0$  Hz, 1H), 5.96 (s, 1H), 1.77 (s, 3H)

$^{13}\text{C}$  NMR (100 MHz,  $\text{CDCl}_3$ )  $\delta$  162.2, 153.4, 142.4, 139.8, 132.9, 129.8, 128.8, 128.3, 127.3, 121.2, 113.0, 89.5, 19.2

HRMS calcd for  $\text{C}_{15}\text{H}_{13}\text{IO}_3\text{S}$  (M+H) 400.9708; found 400.9711.

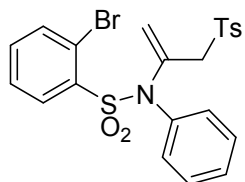

*2-bromo-N-phenyl-N-(3-tosylprop-1-en-2-yl)benzenesulfonamide (15a)*

White solid, 349 mg, 69%

**Melting point:** 144-145 °C

**IR (KBr)**  $\nu_{\text{max}}$ : 3062, 2924, 1593, 1489, 1448, 1317, 1149, 689, 513  $\text{cm}^{-1}$

$^1\text{H}$  NMR (400 MHz,  $\text{CDCl}_3$ )  $\delta$  7.93 (dd,  $J = 7.2, 2.4$  Hz, 1H), 7.70 (dd,  $J = 7.6, 1.6$  Hz, 1H), 7.58 (d,  $J = 8.4$  Hz, 2H), 7.37-7.33 (m, 2H), 7.23-7.19 (m, 7H), 5.38 (s, 1H), 5.37 (s, 1H), 4.06 (s, 2H), 2.41 (s, 3H).

$^{13}\text{C}$  NMR (101 MHz, )  $\delta$  144.8, 137.8 (2), 135.7, 135.3, 135.1, 134.2, 133.3, 129.7, 129.5, 129.2, 128.5, 128.4, 127.4, 120.9, 119.9, 60.4, 21.6.

HRMS calcd for  $\text{C}_{22}\text{H}_{20}\text{BrNO}_4\text{S}_2$  (M+H) 506.0095; found 506.0093.

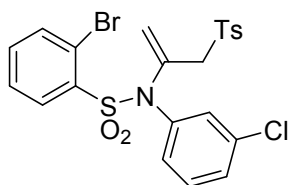

*2-bromo-N-(3-chlorophenyl)-N-(3-tosylprop-1-en-2-yl)benzenesulfonamide (15b)*

White solid, 384 mg, 71%

**Melting point:** 151-152 °C

**IR (KBr)**  $\nu_{\text{max}}$ : 3089, 2924, 1585, 1471, 1317, 1083, 684, 514  $\text{cm}^{-1}$

**$^1\text{H}$  NMR** (400 MHz,  $\text{CDCl}_3$ )  $\delta$  7.97 (dd,  $J = 6.8, 2.4$  Hz, 1H), 7.73 (d,  $J = 6.8$  Hz, 1H), 7.58 (d,  $J = 8.0$  Hz, 2H), 7.40 (t,  $J = 4.4$  Hz, 2H), 7.26-7.23 (m, 3H), 7.17-7.13 (m, 3H), 5.50 (s, 1H), 5.35 (s, 1H), 4.08 (s, 2H), 2.43 (s, 3H)

**$^{13}\text{C}$  NMR** (100 MHz,  $\text{CDCl}_3$ )  $\delta$  145.0, 139.0, 137.5, 135.8, 135.1, 134.9, 134.5 (2), 133.3, 129.9, 129.7, 129.3, 128.5, 128.4, 127.5 (2), 121.5, 120.8, 60.4, 21.7.

**HRMS** calcd for  $\text{C}_{22}\text{H}_{19}\text{BrClNO}_4\text{S}_2$  (M+H) 539.9706; found 539.9700.

**General procedure B: Intramolecular Heck coupling reaction of 7, 11 and 15**

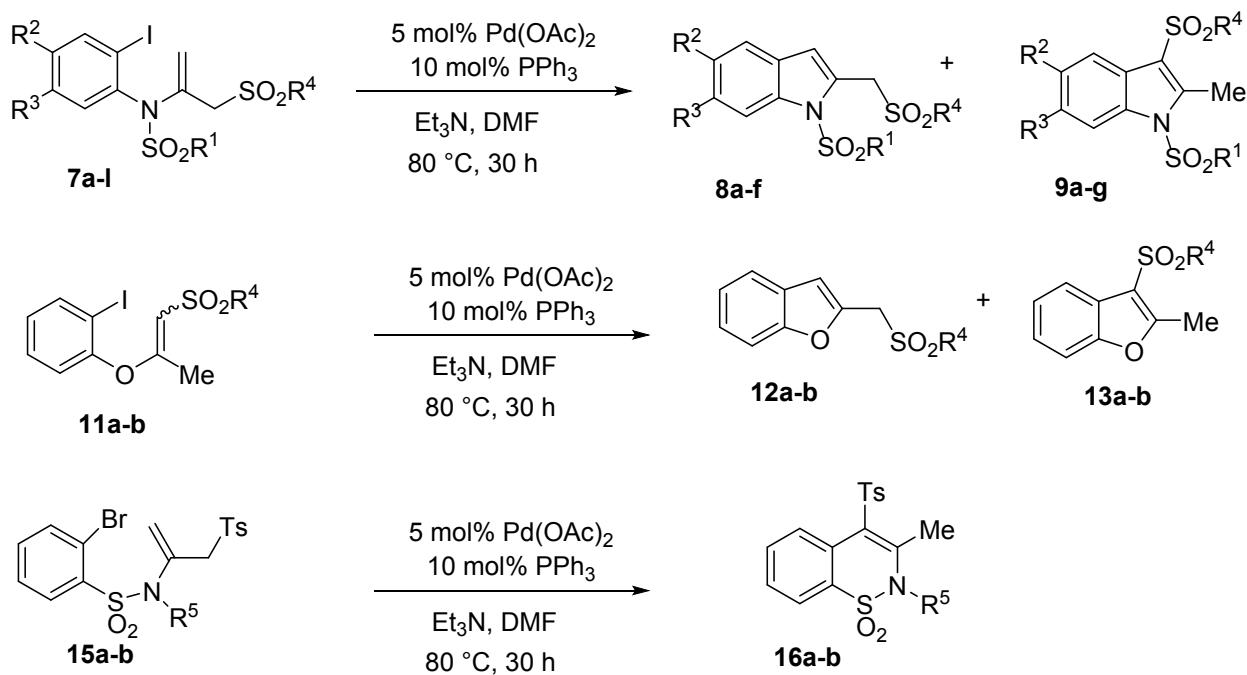

The halo alkenes (**7**, **11** or **15**) (0.4 mmol),  $\text{Pd}(\text{OAc})_2$  (5 mg, 5 mol%),  $\text{PPh}_3$  (11 mg, 10 mol%) and triethylamine (0.17 ml, 1.2 mmol) were suspended in DMF (4 ml) in a reaction tube. The

mixture was heated at 80 °C in an oil bath for 30 h with stirring. Upon completion of reaction, the reaction mixture was diluted with saturated NH<sub>4</sub>Cl (20 ml) and product was extracted with ethyl acetate (3×15 ml). The combined organic layer was washed with brine, dried over sodium sulfate and concentrated at rotavapor under reduced pressure. The residue was subjected to column chromatography on silica gel using petroleum ether-ethyl acetate as eluent to afford analytically pure sample of the products.

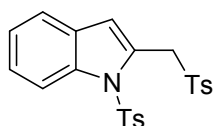

*1-tosyl-2-(tosylmethyl)-1H-indole (8a)*

White solid, 28 mg, 16%

**Melting point:** 139-140 °C

**IR (KBr)**  $\nu_{\max}$ : 2935, 1593, 1490, 1446, 1367, 1309, 1147, 813, 651 cm<sup>-1</sup>

**<sup>1</sup>H NMR** (400 MHz, CDCl<sub>3</sub>)  $\delta$  7.94 (d, *J* = 8.4 Hz, 1H), 7.66 (d, *J* = 8.0 Hz, 2H), 7.55 (d, *J* = 8.0 Hz, 2H), 7.48 (d, *J* = 7.6 Hz, 1H), 7.30-7.20 (m, 4H), 7.14 (d, *J* = 8.4 Hz, 2H), 6.89 (s, 1H), 5.03 (s, 2H), 2.42 (s, 3H), 2.29 (s, 3H)

**<sup>13</sup>C NMR** (100 MHz, CDCl<sub>3</sub>)  $\delta$  145.2, 145.1, 137.3, 135.4, 135.1, 129.9, 129.7, 129.2, 128.8, 127.6, 126.5, 125.4, 124.1, 121.3, 116.1, 115.2, 55.1, 21.8, 21.6

**HRMS** calcd for C<sub>23</sub>H<sub>21</sub>NO<sub>4</sub>S<sub>2</sub> (M+H) 440.0990; found 440.0990.

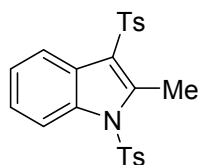

*2-methyl-1,3-ditosyl-1H-indole (9a)*

White solid, 113 mg, 64%

**Melting point:** 176-178 °C

**IR (KBr)**  $\nu_{\max}$ : 2922, 1593, 1543, 1442, 1371, 1153, 715, 534 cm<sup>-1</sup>

**<sup>1</sup>H NMR** (400 MHz, CDCl<sub>3</sub>)  $\delta$  8.22-8.19 (m, 1H), 8.11-8.09 (m, 1H), 7.80 (d, *J* = 8.0 Hz, 2H), 7.69 (d, *J* = 8.4 Hz, 2H), 7.34-7.31 (m, 2H), 7.25 (d, *J* = 8.0 Hz, 4H), 2.97 (s, 3H), 2.37 (s, 3H), 2.36 (s, 3H)

$^{13}\text{C}$  NMR (100 MHz,  $\text{CDCl}_3$ )  $\delta$  146.1, 144.2, 142.3, 139.8, 135.6, 135.4, 130.3, 129.9, 126.7, 126.5, 125.5, 125.4, 124.8, 120.4, 119.9, 114.4, 21.7, 21.6, 13.1

HRMS calcd for  $\text{C}_{23}\text{H}_{21}\text{NO}_4\text{S}_2$  (M+H) 440.0990 ; found 440.1000.

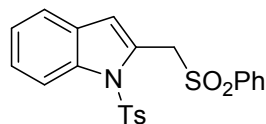

*2-((phenylsulfonyl)methyl)-1-tosyl-1H-indole (8b)*

White solid, 27 mg, 16%

**Melting point:** 118-119 °C

**IR (KBr)**  $\nu_{\text{max}}$ : 3014, 2947, 1565, 1448, 1361, 1300, 1145, 736, 538  $\text{cm}^{-1}$

$^1\text{H}$  NMR (400 MHz,  $\text{CDCl}_3$ )  $\delta$  7.93 (d,  $J = 8.4$  Hz, 1H), 7.78 (d,  $J = 8.0$  Hz, 2H), 7.64 (t,  $J = 7.6$  Hz, 1H), 7.54 (d,  $J = 8.4$  Hz, 2H), 7.49-7.45 (m, 3H), 7.30-7.22 (m, 2H), 7.13 (d,  $J = 8.4$  Hz, 2H), 6.90 (s, 1H), 5.05 (s, 2H), 2.29 (s, 3H)

$^{13}\text{C}$  NMR (100 MHz,  $\text{CDCl}_3$ )  $\delta$  145.2, 138.3, 137.3, 135.0, 134.1, 129.9, 129.2, 129.1, 128.8, 127.4, 126.5, 125.5, 124.1, 121.3, 116.3, 115.2, 55.2, 21.6.

HRMS calcd for  $\text{C}_{22}\text{H}_{19}\text{NO}_4\text{S}_2$  (M+H) 426.0834 ; found 426.0838

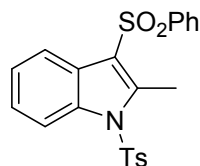

*2-methyl-3-(phenylsulfonyl)-1-tosyl-1H-indole (9b)*

White solid, 106 mg, 62%

**Melting point:** 164-165 °C

**IR (KBr)**  $\nu_{\text{max}}$ : 3057, 1544, 1442, 1373, 1313, 1182, 700, 542  $\text{cm}^{-1}$

$^1\text{H}$  NMR (400 MHz,  $\text{CDCl}_3$ )  $\delta$  8.23-8.21 (m, 1H), 8.12-8.10 (m, 1H), 7.92 (d,  $J = 8.2$  Hz, 2H), 7.69 (d,  $J = 8.2$  Hz, 2H), 7.56-7.52 (m, 1H), 7.48-7.45 (m, 2H), 7.36-7.33 (m, 2H), 7.26 (d,  $J = 8.1$  Hz, 2H), 2.98 (s, 3H), 2.38 (s, 3H).

$^{13}\text{C}$  NMR (100 MHz,  $\text{CDCl}_3$ )  $\delta$  146.1, 142.7, 142.6, 135.6, 135.4, 133.2, 130.4, 129.3, 126.7, 126.4, 125.6, 125.4, 124.9, 120.4, 119.5, 114.5, 21.7, 13.1

HRMS calcd for  $\text{C}_{22}\text{H}_{19}\text{NO}_4\text{S}_2$  (M+H) 426.0834; found 426.0838

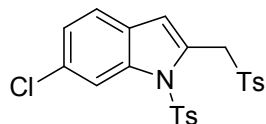

*6-chloro-1-tosyl-2-(tosylmethyl)-1H-indole (8c)*

White solid, 27mg, 14%

**Melting point:** 127-129 °C

**IR (KBr)**  $\nu_{\max}$ : 3107, 2924, 1563, 1452, 1369, 1317, 1153, 536  $\text{cm}^{-1}$

**$^1\text{H}$  NMR** (400 MHz,  $\text{CDCl}_3$ )  $\delta$  7.99 (d,  $J = 1.6$  Hz, 1H), 7.65 (d,  $J = 8.4$  Hz, 2H), 7.56 (d,  $J = 8.4$  Hz, 2H), 7.40 (d,  $J = 8.4$  Hz, 1H), 7.28 (d,  $J = 8.0$  Hz, 2H), 7.22 (dd,  $J = 8.4, 2.0$  Hz, 1H), 7.18 (d,  $J = 8.0$  Hz, 2H), 6.88 (s, 1H), 4.99 (s, 2H), 2.44 (s, 3H), 2.32 (s, 3H)

**$^{13}\text{C}$  NMR** (100 MHz,  $\text{CDCl}_3$ )  $\delta$  145.6, 145.3, 137.6, 135.3, 134.9, 131.5, 130.0, 129.8, 128.7, 128.3, 127.6, 126.5, 124.8, 122.0, 115.4, 115.3, 55.0, 21.8, 21.6

**HRMS** calcd for  $\text{C}_{23}\text{H}_{20}\text{ClNO}_4\text{S}_2$  (M+H) 474.0601; found 474.0610.

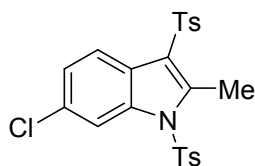

*6-chloro-2-methyl-1,3-ditosyl-1H-indole (9c)*

White solid, 131 mg, 69%

**Melting point:** 194-196 °C

**IR (KBr)**  $\nu_{\max}$ : 2922, 1544, 1417, 1373, 1311, 1151, 761, 535  $\text{cm}^{-1}$

**$^1\text{H}$  NMR** (400 MHz,  $\text{CDCl}_3$ )  $\delta$  8.25 (d,  $J = 1.6$  Hz, 1H), 8.02 (d,  $J = 8.8$  Hz, 1H), 7.77 (d,  $J = 8.4$  Hz, 2H), 7.68 (d,  $J = 8.4$  Hz, 2H), 7.31-7.24 (m, 5H), 2.92 (s, 3H), 2.39 (s, 3H), 2.36 (s, 3H).

**$^{13}\text{C}$  NMR** (100 MHz,  $\text{CDCl}_3$ )  $\delta$  146.4, 144.4, 142.8, 139.5, 135.9, 135.1, 131.7, 130.5, 130.0, 126.7, 126.5, 125.5, 124.0, 121.2, 119.8, 114.6, 21.8, 21.6, 13.1.

**HRMS** calcd for  $\text{C}_{23}\text{H}_{20}\text{ClNO}_4\text{S}_2$  (M+H) 474.0601; found 474.0608.

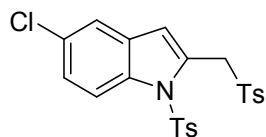

*5-chloro-1-tosyl-2-(tosylmethyl)-1H-indole (8d)*

White solid, 25 mg, 13%

**Melting point:** 135-136 °C

**IR (KBr)**  $\nu_{\max}$ : 2922, 1595, 1442, 1371, 1317, 1155, 715, 536  $\text{cm}^{-1}$

**$^1\text{H}$  NMR** (400 MHz,  $\text{CDCl}_3$ )  $\delta$  7.87 (d,  $J = 8.8$  Hz, 1H), 7.65 (d,  $J = 8.4$  Hz, 2H), 7.53 (d,  $J = 8.0$  Hz, 2H), 7.44 (d,  $J = 2.0$  Hz, 1H), 7.27 (d,  $J = 8.0$  Hz, 2H), 7.23 (dd,  $J = 8.8, 2.0$  Hz, 1H), 7.15 (d,  $J = 8.4$  Hz, 2H), 6.81 (s, 1H), 5.00 (s, 2H), 2.42 (s, 3H), 2.30 (s, 3H)

**$^{13}\text{C}$  NMR** (100 MHz,  $\text{CDCl}_3$ )  $\delta$  145.5, 145.3, 135.6, 135.3, 134.9, 130.3, 130.0, 129.9, 129.8, 129.2, 128.8, 126.5, 125.7, 120.8, 116.2, 115.1, 55.0, 21.8, 21.6.

**HRMS** calcd for  $\text{C}_{23}\text{H}_{20}\text{ClNO}_4\text{S}_2$  (M+H) 474.0601; found 474.0616.

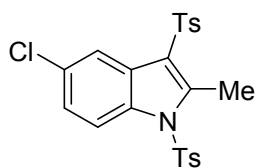

*5-chloro-2-methyl-1,3-ditosyl-1H-indole (9d)*

White solid, 129 mg, 68%

**Melting point:** 188-189 °C

**IR (KBr)**  $\nu_{\max}$ : 2924, 1541, 1436, 1373, 1315, 1149, 759, 532  $\text{cm}^{-1}$

**$^1\text{H}$  NMR** (400 MHz,  $\text{CDCl}_3$ )  $\delta$  8.13 (d,  $J = 8.8$  Hz, 1H), 8.11 (d,  $J = 2.0$  Hz, 1H), 7.78 (d,  $J = 8.4$  Hz, 2H), 7.66 (d,  $J = 8.4$  Hz, 2H), 7.31-7.25 (m, 5H), 2.93 (s, 3H), 2.38 (s, 3H), 2.37 (s, 3H).

**$^{13}\text{C}$  NMR** (100 MHz,  $\text{CDCl}_3$ )  $\delta$  146.4, 144.5, 143.5, 139.5, 135.1, 134.0, 130.8, 130.4, 130.0, 126.7, 126.5, 125.8, 120.0, 119.5, 115.5, 21.7, 21.6, 13.2

**HRMS** calcd for  $\text{C}_{23}\text{H}_{20}\text{ClNO}_4\text{S}_2$  (M+H) 474.0601; found 474.0617.

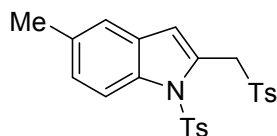

*5-methyl-1-tosyl-2-(tosylmethyl)-1H-indole (8e)*

White solid, 24 mg, 13%

**Melting point:** 120-122 °C

**IR (KBr)**  $\nu_{\max}$ : 3035, 2922, 1581, 1435, 1365, 1292, 1130, 661  $\text{cm}^{-1}$

**<sup>1</sup>H NMR** (400 MHz, CDCl<sub>3</sub>) δ 7.82 (d, *J* = 8.6 Hz, 1H), 7.65 (d, *J* = 8.0 Hz, 2H), 7.52 (d, *J* = 8.1 Hz, 2H), 7.27- 7.25 (m, 3H), 7.13-7.08 (m, 3H), 6.82 (s, 1H), 5.01 (s, 2H), 2.42 (s, 3H), 2.38 (s, 3H), 2.29 (s, 2H).

**<sup>13</sup>C NMR** (100 MHz, CDCl<sub>3</sub>) δ 145.0, 135.6, 135.4, 135.1, 133.8, 129.8, 129.7, 129.4, 128.8, 127.6, 126.9, 126.5, 121.1, 116.0, 114.9, 55.2, 21.8, 21.6, 21.2

**HRMS** calcd for C<sub>24</sub>H<sub>23</sub>NO<sub>4</sub>S<sub>2</sub> (M+H) 454.1147 ; found 454.1149.

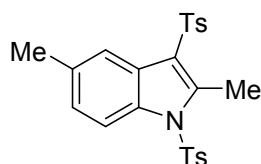

*2,5-dimethyl-1,3-ditosyl-1H-indole (9e)*

White solid, 131 mg, 72%

**Melting point:** 191-193 °C

**IR (KBr)**  $\nu_{\max}$ : 2924, 1591, 1544, 1456, 1369, 1315, 1145, 677, 534 cm<sup>-1</sup>

**<sup>1</sup>H NMR** (400 MHz, CDCl<sub>3</sub>) δ 8.07 (d, *J* = 8.8 Hz, 1H), 7.89 (d, *J* = 1.6 Hz, 1H), 7.79 (d, *J* = 8.4 Hz, 2H), 7.66 (d, *J* = 8.4 Hz, 2H), 7.25-7.22 (m, 4H), 7.15 (dd, *J* = 8.8, 1.6 Hz, 1H), 2.94 (s, 3H), 2.43 (s, 3H), 2.36 (s, 6H).

**<sup>13</sup>C NMR** (100 MHz, CDCl<sub>3</sub>) δ 146.0, 144.1, 142.3, 139.8, 135.4, 134.6, 133.8, 130.3, 129.9, 126.9, 126.6, 126.4, 125.6, 120.1, 119.6, 114.1, 21.7, 21.6, 21.5, 13.1.

**HRMS** calcd for C<sub>24</sub>H<sub>23</sub>NO<sub>4</sub>S<sub>2</sub> (M+H) 454.1147; found 454.1147.

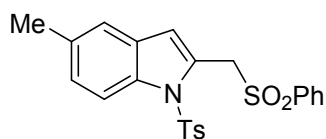

*5-methyl-2-((phenylsulfonyl)methyl)-1-tosyl-1H-indole (8f)*

White solid, 26 mg, 15%

**Melting point:** 117-118 °C

**IR (KBr)**  $\nu_{\max}$ : 3010, 2941, 1585, 1450, 1359, 1298, 1170, 738, 578 cm<sup>-1</sup>

**<sup>1</sup>H NMR** (400 MHz, CDCl<sub>3</sub>) δ 7.81 (d, *J* = 8.8 Hz, 1H), 7.77 (dd, *J* = 8.4, 1.2 Hz, 2H), 7.66-7.11 (m, 1H), 7.52-7.45 (m, 4H), 7.25 (s, 1H), 7.13-7.09 (m, 3H), 6.83 (s, 1H), 5.03 (s, 2H), 2.38 (s, 3H), 2.29 (s, 3H).

**<sup>13</sup>C NMR** (100 MHz, CDCl<sub>3</sub>) δ 145.1, 138.2, 135.6, 135.0, 134.0, 133.8, 129.8, 129.4, 129.0, 128.9, 127.4, 127.0, 126.4, 121.1, 116.2, 114.9, 55.2, 21.6, 21.1.

**HRMS** calcd for C<sub>23</sub>H<sub>21</sub>NO<sub>4</sub>S<sub>2</sub> (M+H) 440.0990; found 440.1004.

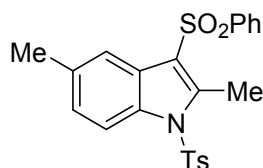

*2,5-dimethyl-3-(phenylsulfonyl)-1-tosyl-1H-indole (9f)*

White solid, 121 mg, 69%

**Melting point:** 172-173 °C

**IR (KBr)**  $\nu_{\max}$ : 2924, 1593, 1544, 1444, 1373, 1313, 1147, 678, 538 cm<sup>-1</sup>

**<sup>1</sup>H NMR** (400 MHz, CDCl<sub>3</sub>) δ 8.07 (d, *J* = 8.4 Hz, 1H), 7.92-7.89 (m, 3H), 7.67 (d, *J* = 8.4 Hz, 2H), 7.55-7.51 (m, 1H), 7.48-7.44 (m, 2H), 7.24 (d, *J* = 8.0 Hz, 2H), 7.16 (dd, *J* = 8.8, 1.6 Hz, 1H), 2.94 (s, 3H), 2.43 (s, 3H), 2.37 (s, 3H).

**<sup>13</sup>C NMR** (100 MHz, CDCl<sub>3</sub>) δ 146.0, 142.7, 142.6, 135.4, 134.7, 133.8, 133.2, 130.3, 129.2, 127.0, 126.6, 126.4, 125.6, 120.1, 119.2, 114.1, 21.7, 21.5, 13.1.

**HRMS** calcd for C<sub>23</sub>H<sub>21</sub>NO<sub>4</sub>S<sub>2</sub> (M+H) 440.0990; found 440.1005.

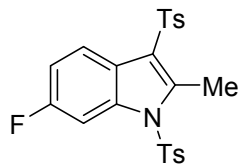

*6-fluoro-2-methyl-1,3-ditosyl-1H-indole (9g)*

White solid, 111 mg, 61%

**Melting point:** 187-188 °C

**IR (KBr)**  $\nu_{\max}$ : 2922, 1591, 1546, 1483, 1373, 1317, 1149, 806, 532 cm<sup>-1</sup>



**<sup>1</sup>H NMR** (400 MHz, CDCl<sub>3</sub>) δ 8.05 (dd, *J* = 8.8, 5.6 Hz, 1H), 7.96 (dd, *J* = 10.4, 2.0 Hz, 1H), 7.78 (d, *J* = 8.0 Hz, 2H), 7.69 (d, *J* = 8.0 Hz, 2H), 7.27 (t, *J* = 8.4 Hz, 4H), 7.09 (td, *J* = 8.8, 2.0 Hz, 1H), 2.93 (s, 3H), 2.39 (s, 3H), 2.36 (s, 3H).

**<sup>13</sup>C NMR** (100 MHz, CDCl<sub>3</sub>) δ 161.1 (d, *J* = 243 Hz), 146.4, 144.4, 142.6 (d, *J* = 4.2 Hz), 139.6, 135.8 (d, *J* = 12.5 Hz), 135.1, 130.5, 130.0, 126.7, 126.5, 121.7, 121.4 (d, *J* = 2.5 Hz), 119.7, 113.2 (d, *J* = 24.0 Hz), 102.0 (d, *J* = 30.0 Hz), 21.7, 21.6, 13.1

**HRMS** calcd for C<sub>23</sub>H<sub>20</sub>FNO<sub>4</sub>S<sub>2</sub> (M+H) 458.0896; found 458.0921.

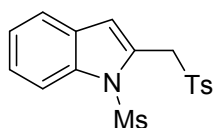

*1-(methylsulfonyl)-2-(tosylmethyl)-1H-indole (8g)*

White solid, 108 mg, 74%

**Melting point:** 146-147 °C

**IR (KBr)**  $\nu_{\max}$ : 3014, 2926, 1565, 1446, 1355, 1309, 1151, 536 cm<sup>-1</sup>

**<sup>1</sup>H NMR** (400 MHz, CDCl<sub>3</sub>) δ 7.94 (d, *J* = 8.4 Hz, 1H), 7.79 (d, *J* = 8.0 Hz, 2H), 7.56 (d, *J* = 7.6 Hz, 1H), 7.37-7.34 (m, 3H), 7.30 (d, *J* = 7.6 Hz, 1H), 6.65 (s, 1H), 4.97 (s, 2H), 3.42 (s, 3H), 2.46 (s, 3H)

**<sup>13</sup>C NMR** (100 MHz, CDCl<sub>3</sub>) δ 145.3, 147.0, 135.9, 130.0, 128.5, 126.7, 125.6, 123.8, 121.5, 114.4, 114.0, 54.8, 41.2, 21.8.

**HRMS** calcd for C<sub>17</sub>H<sub>17</sub>NO<sub>4</sub>S<sub>2</sub> (M+H) 364.0677; found 364.0681.

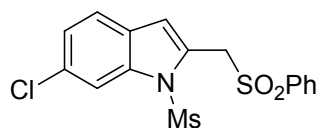

*6-chloro-1-(methylsulfonyl)-2-((phenylsulfonyl)methyl)-1H-indole (8h)*

White solid, 112 mg, 73%

**Melting point:** 186-187 °C

**IR (KBr)**  $\nu_{\max}$ : 2953, 1583, 1444, 1361, 1309, 1161, 543 cm<sup>-1</sup>

**<sup>1</sup>H NMR** (400 MHz, CDCl<sub>3</sub>) δ 7.92 (d, *J* = 7.6 Hz, 2H), 7.87 (d, *J* = 8.8 Hz, 1H), 7.70 (t, *J* = 7.6 Hz, 1H), 7.59 (t, *J* = 7.6 Hz, 2H), 7.53 (s, 1H), 7.34 (dd, *J* = 7.2, 1.6 Hz, 1H), 6.58 (s, 1H), 4.98 (s, 2H), 3.43 (s, 3H).

$^{13}\text{C}$  NMR (100 MHz,  $\text{CDCl}_3$ )  $\delta$  138.6, 135.3, 134.4, 129.7, 129.6, 129.5, 128.5, 127.9, 125.9, 121.0, 115.1, 113.7, 54.6, 41.5.

HRMS calcd for  $\text{C}_{16}\text{H}_{14}\text{ClNO}_4\text{S}_2$  (M+H) 384.0131; found 384.0149.

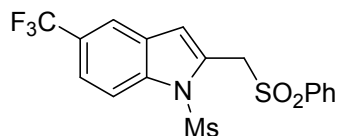

*1-(methylsulfonyl)-2-((phenylsulfonyl)methyl)-5-(trifluoromethyl)-1H-indole (8i)*

White solid, 102 mg, 61%

**Melting point:** 204-205 °C

**IR (KBr)**  $\nu_{\text{max}}$ : 3008, 2953, 1620, 1448, 1356, 1313, 1159, 542  $\text{cm}^{-1}$

$^1\text{H}$  NMR (400 MHz,  $\text{CDCl}_3$ )  $\delta$  8.06 (d,  $J$  = 8.8 Hz, 1H), 7.93 (d,  $J$  = 8.4 Hz, 2H), 7.86 (d,  $J$  = 0.8 Hz, 1H), 7.73-7.69 (m, 1H), 7.63-7.58 (m, 3H), 6.71 (s, 1H), 5.02 (s, 2H), 3.49 (s, 3H).

$^{13}\text{C}$  NMR (100 MHz,  $\text{CDCl}_3$ )  $\delta$  138.6, 138.4, 134.4, 129.5, 128.6, 128.5, 128.1, 126.4 (q,  $J$  = 32.5 Hz), 125.7, 123.0, 122.3 (q,  $J$  = 3.1 Hz), 119.0 (q,  $J$  = 4.1 Hz), 114.5, 114.2, 54.6, 41.8

HRMS calcd for  $\text{C}_{17}\text{H}_{14}\text{F}_3\text{NO}_4\text{S}_2$  (M+H) 418.0395; found 418.0415.

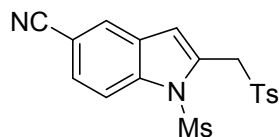

*1-(methylsulfonyl)-2-(tosylmethyl)-1H-indole-5-carbonitrile (8j)*

White solid, 90 mg, 58%

**Melting point:** 180-181 °C

**IR (KBr)**  $\nu_{\text{max}}$ : 3020, 2926, 2223, 1595, 1456, 1363, 1303, 1138, 509  $\text{cm}^{-1}$

$^1\text{H}$  NMR (400 MHz,  $\text{CDCl}_3$ )  $\delta$  8.05 (d,  $J$  = 8.4 Hz, 1H), 7.91 (d,  $J$  = 1.6 Hz, 1H), 7.80 (d,  $J$  = 8.0 Hz, 2H), 7.63 (dd,  $J$  = 8.4, 1.6 Hz, 1H), 7.39 (d,  $J$  = 8.0 Hz, 2H), 6.69 (s, 1H), 4.98 (s, 2H), 3.53 (s, 3H), 2.48 (s, 3H).

$^{13}\text{C}$  NMR (100 MHz,  $\text{CDCl}_3$ )  $\delta$  145.7, 138.6, 135.5, 130.2, 129.4, 128.5, 128.4, 128.3, 126.3, 119.0, 115.0, 113.5, 107.6, 54.6, 42.0, 21.8.

HRMS calcd for  $\text{C}_{18}\text{H}_{16}\text{N}_2\text{O}_4\text{S}_2$  (M+H) 389.0630; found 389.0631.

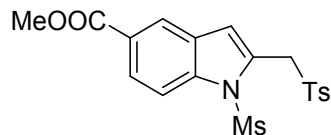

*Methyl-1-(methylsulfonyl)-2-(tosylmethyl)-1H-indole-5-carboxylate (8k)*

White solid, 106 mg, 63%

**Melting point:** 178-179 °C

**IR (KBr)**  $\nu_{\text{max}}$ : 3014, 2958, 1716, 1606, 1438, 1354, 1136, 538  $\text{cm}^{-1}$

**<sup>1</sup>H NMR** (400 MHz, CDCl<sub>3</sub>)  $\delta$  8.29 (s, 1H), 8.08 (d,  $J = 8.8$  Hz, 1H), 7.99 (d,  $J = 8.8$  Hz, 1H), 7.80 (d,  $J = 7.6$  Hz, 2H), 7.39 (d,  $J = 7.6$  Hz, 2H), 6.68 (s, 1H), 4.99 (s, 2H), 3.95 (s, 3H), 3.51 (s, 3H), 2.48 (s, 3H).

**<sup>13</sup>C NMR** (100 MHz, CDCl<sub>3</sub>)  $\delta$  167.0, 145.5, 139.4, 135.6, 130.1, 128.5, 128.3, 128.2, 126.6, 125.9, 123.7, 114.5, 113.8, 54.7, 52.3, 41.7, 21.8.

**HRMS** calcd for C<sub>19</sub>H<sub>19</sub>NO<sub>6</sub>S<sub>2</sub> (M+H) 422.0732; found 422.0749.

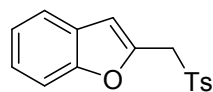

*2-(tosylmethyl)benzofuran (12a)*

White solid, 72 mg, 63%

**Melting point:** 196-197 °C

**IR (KBr)**  $\nu_{\text{max}}$ : 2987, 1591, 1448, 1303, 1286, 1145, 719, 520  $\text{cm}^{-1}$

**<sup>1</sup>H NMR** (400 MHz, CDCl<sub>3</sub>)  $\delta$  7.64 (d,  $J = 8.4$  Hz, 2H), 7.53-7.51 (m, 1H), 7.37-7.35 (m, 1H), 7.29-7.27 (m, 3H), 7.22 (td,  $J = 7.6, 1.2$  Hz, 1H), 6.67 (d,  $J = 0.8$  Hz, 1H), 4.53 (s, 2H), 2.43 (s, 3H)

**<sup>13</sup>C NMR** (100 MHz, CDCl<sub>3</sub>)  $\delta$  155.3, 145.3, 145.2, 135.3, 129.8, 128.6, 128.0, 125.0, 123.1, 121.3, 111.3, 108.9, 56.5, 21.7

**HRMS** calcd for C<sub>16</sub>H<sub>14</sub>O<sub>3</sub>S (M+H) 287.0742; found 287.0746.

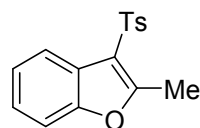

*2-methyl-3-tosylbenzofuran (13a)*

White solid, 18 mg, 16%

**Melting point:** 122-123 °C

**IR (KBr)**  $\nu_{\max}$ : 2922, 1583, 1446, 1296, 1143, 758, 580  $\text{cm}^{-1}$

**$^1\text{H}$  NMR** (400 MHz,  $\text{CDCl}_3$ )  $\delta$  7.90-7.85 (m, 3H), 7.42-7.39 (m, 1H), 7.31-7.28 (m, 4H), 2.80 (s, 3H), 2.38 (s, 3H).

**$^{13}\text{C}$  NMR** (100 MHz,  $\text{CDCl}_3$ )  $\delta$  160.6, 153.2, 144.3, 139.7, 129.9, 126.7, 125.2, 124.4, 124.3, 120.3, 118.2, 111.2, 21.6, 13.6.

**HRMS** calcd for  $\text{C}_{16}\text{H}_{14}\text{O}_3\text{S}$  (M+H) 287.0742; found 287.0740.

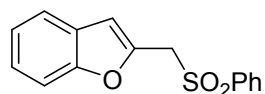

*2-((phenylsulfonyl)methyl)benzofuran (12b)*

White solid, 70 mg, 64%

**Melting point:** 162-163 °C

**IR (KBr)**  $\nu_{\max}$ : 2880, 1581, 1448, 1305, 1141, 735, 569  $\text{cm}^{-1}$

**$^1\text{H}$  NMR** (400 MHz,  $\text{CDCl}_3$ )  $\delta$  7.76 (d,  $J = 8.0\text{Hz}$ , 2H), 7.63 (t,  $J = 7.6\text{Hz}$ , 1H), 7.52-7.45 (m, 3H), 7.33 (d,  $J = 8.0\text{Hz}$ , 1H), 7.24-7.19 (m, 2H), 6.63 (s, 1H), 4.54 (s, 2H).

**$^{13}\text{C}$  NMR** (100 MHz,  $\text{CDCl}_3$ )  $\delta$  155.3, 145.1, 138.2, 134.1, 129.2, 128.6, 127.9, 125.0, 123.2, 121.3, 111.3, 109.0, 56.5

**HRMS** calcd for  $\text{C}_{15}\text{H}_{12}\text{O}_3\text{S}$  (M+H) 273.0585; found 273.0589.

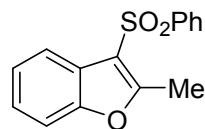

*2-methyl-3-(phenylsulfonyl)benzofuran (13b)*

White solid, 17 mg, 16%

**Melting point:** 106-107 °C

**IR (KBr)**  $\nu_{\max}$ : 3064, 2920, 1577, 1444, 1309, 1149, 750, 545  $\text{cm}^{-1}$

**$^1\text{H}$  NMR** (400 MHz,  $\text{CDCl}_3$ )  $\delta$  8.00 (d,  $J = 8.4\text{ Hz}$ , 2H), 7.88-7.86 (m, 1H), 7.56 (t,  $J = 7.8\text{ Hz}$ , 1H), 7.50 (t,  $J = 7.6\text{ HZ}$ , 2H), 7.42-7.39 (m, 1H), 7.31-7.28 (m, 2H), 2.80 (s, 3H).

$^{13}\text{C}$  NMR (100 MHz,  $\text{CDCl}_3$ )  $\delta$  160.9, 153.3, 142.5, 133.3, 129.3, 126.7, 125.3, 124.5, 124.4, 120.3, 117.9, 111.3, 13.7

HRMS calcd for  $\text{C}_{15}\text{H}_{12}\text{O}_3\text{S}$  (M+H) 273.0585; found 273.0589.

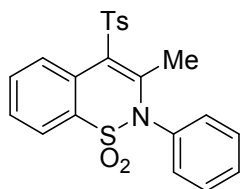

*3-methyl-2-phenyl-4-tosyl-2H-benzo[e][1,2]thiazine 1,1-dioxide (16a)*

White solid, 97 mg, 57%

**Melting point:** 168-169 °C

**IR (KBr)**  $\nu_{\text{max}}$ : 3064, 2924, 1570, 1541, 1492, 1346, 1282, 1139, 1083, 665, 565  $\text{cm}^{-1}$

$^1\text{H}$  NMR (400 MHz,  $\text{CDCl}_3$ )  $\delta$  8.42 (d,  $J = 8.4\text{Hz}$ , 1H), 7.74 (d,  $J = 8.0\text{Hz}$ , 3H), 7.59 (t,  $J = 4.0\text{Hz}$ , 1H), 7.47 (d,  $J = 7.6\text{Hz}$ , 1H), 7.44-7.39 (m, 3H), 7.24 (d,  $J = 8.0\text{Hz}$ , 2H), 7.14-7.12 (m, 2H), 2.41 (s, 3H), 2.35 (s, 3H)

$^{13}\text{C}$  NMR (100 MHz,  $\text{CDCl}_3$ )  $\delta$  149.7, 144.2, 139.0, 134.9, 132.3, 132.2, 129.8, 129.7, 129.6, 128.8, 128.3, 127.6, 126.9, 123.1, 122.0, 21.6, 20.7

HRMS calcd for  $\text{C}_{22}\text{H}_{19}\text{NO}_4\text{S}_2$  (M+H) 426.0834; found 426.0833.

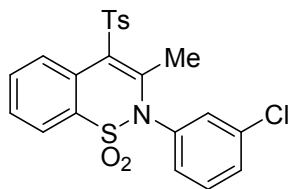

*2-(3-chlorophenyl)-3-methyl-4-tosyl-2H-benzo[e][1,2]thiazine 1,1-dioxide (16b)*

White solid, 109 mg, 59%

**Melting point:** 184-185 °C

**IR (KBr)**  $\nu_{\text{max}}$ : 2960, 1571, 1546, 1469, 1357, 1284, 1143, 1083, 671, 565  $\text{cm}^{-1}$

$^1\text{H}$  NMR (400 MHz,  $\text{CDCl}_3$ )  $\delta$  8.41 (d,  $J = 8.4\text{ Hz}$ , 1H), 7.72 (d,  $J = 8.4\text{ Hz}$ , 3H), 7.61-7.57 (m, 1H), 7.46 (td,  $J = 8.0, 0.8\text{ Hz}$ , 1H), 7.38 (dt,  $J = 8.0, 1.6\text{ Hz}$ , 1H), 7.32 (t,  $J = 8.0\text{ Hz}$ , 1H), 7.23 (d,  $J = 8.0\text{ Hz}$ , 2H), 7.11 (t,  $J = 2.0\text{ Hz}$ , 1H), 7.05-7.02 (m, 1H), 2.41 (s, 3H), 2.34 (s, 3H).

**<sup>13</sup>C NMR** (100 MHz, CDCl<sub>3</sub>) δ 149.0, 144.3, 138.7, 135.9, 135.3, 132.4, 130.5, 129.8, 129.7, 129.4, 128.8, 128.6, 127.8, 127.0, 124.0, 122.1, 21.6, 20.7.

**HRMS** calcd for C<sub>22</sub>H<sub>18</sub>ClNO<sub>4</sub>S<sub>2</sub> (M+H) 460.0444; found 460.0436.

# NMR spectra of new compounds

7a, CDCl<sub>3</sub>

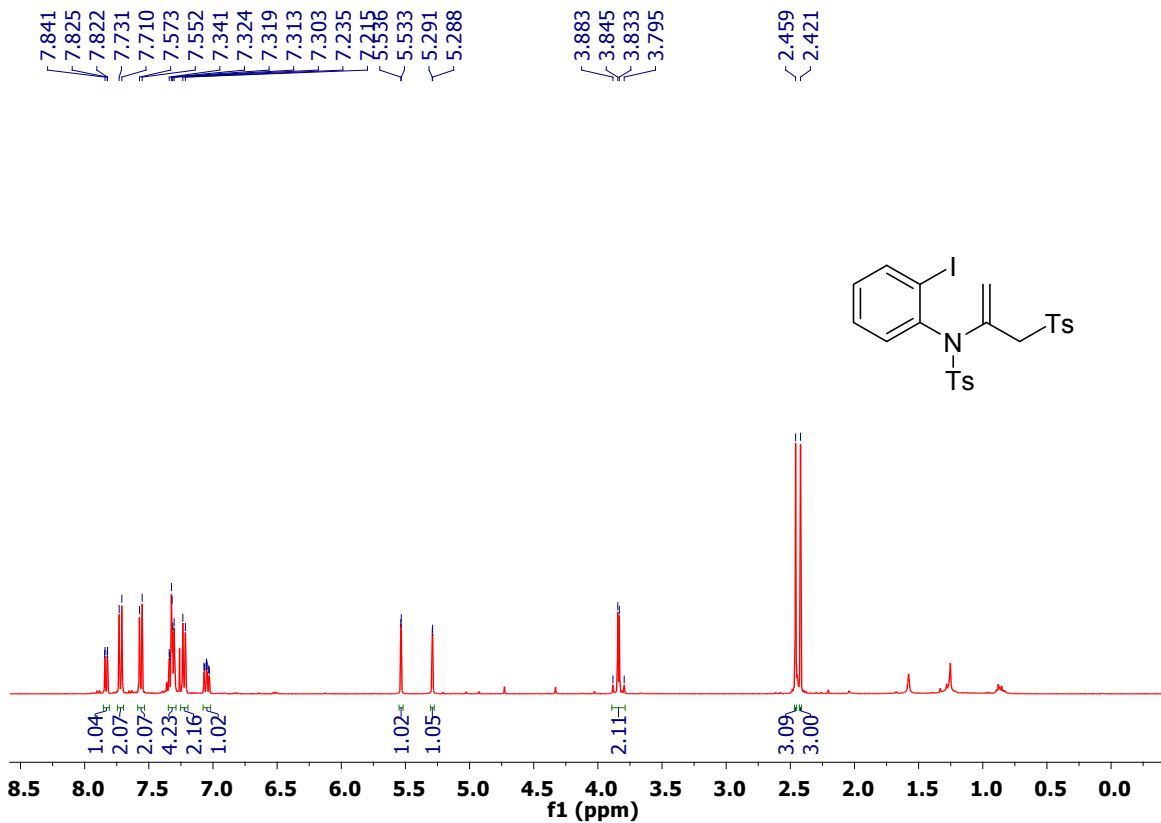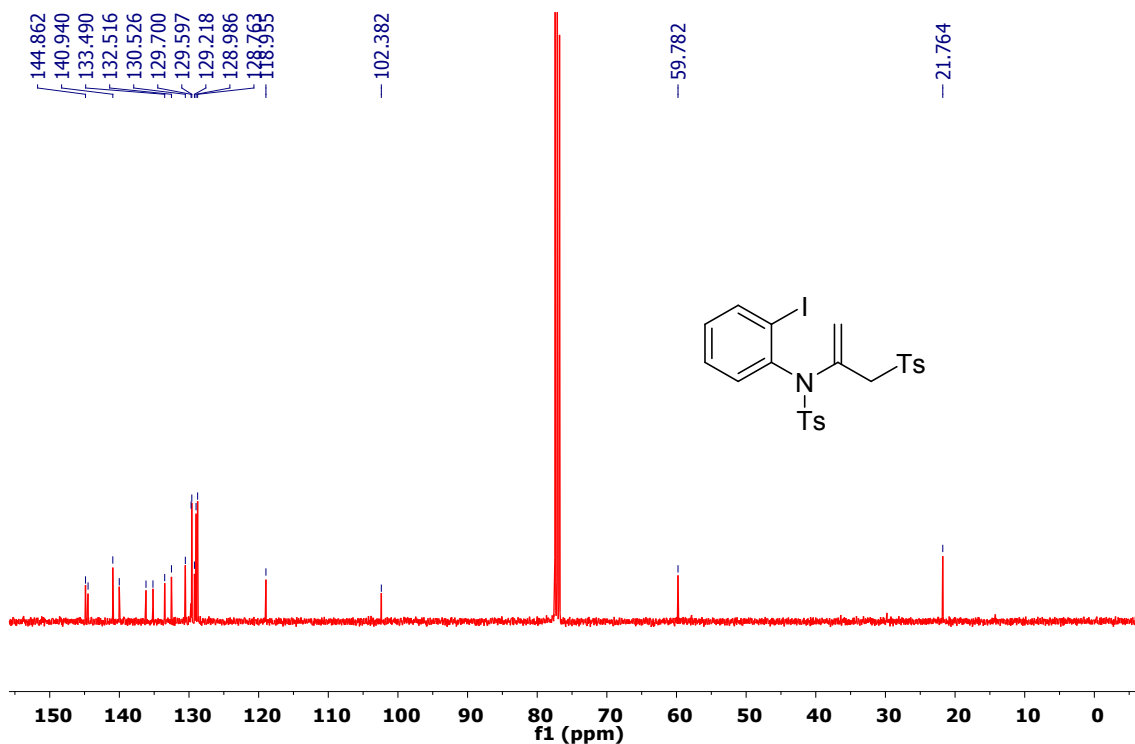

7b, CDCl<sub>3</sub>

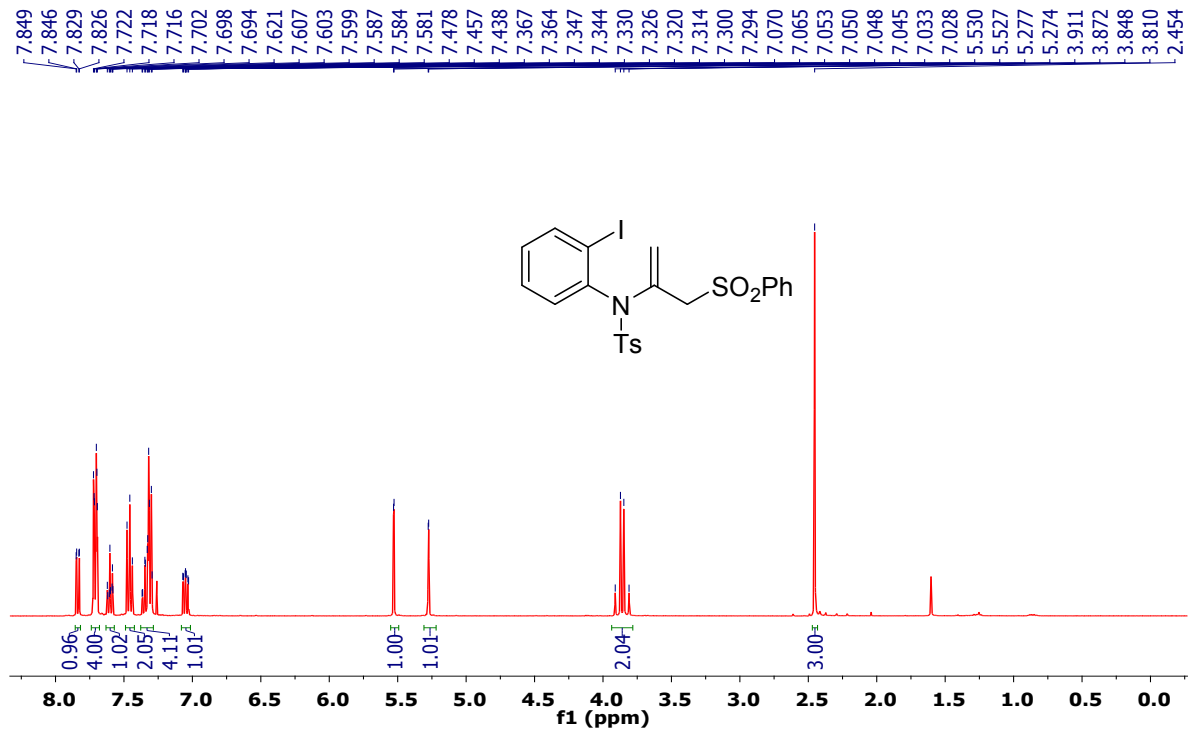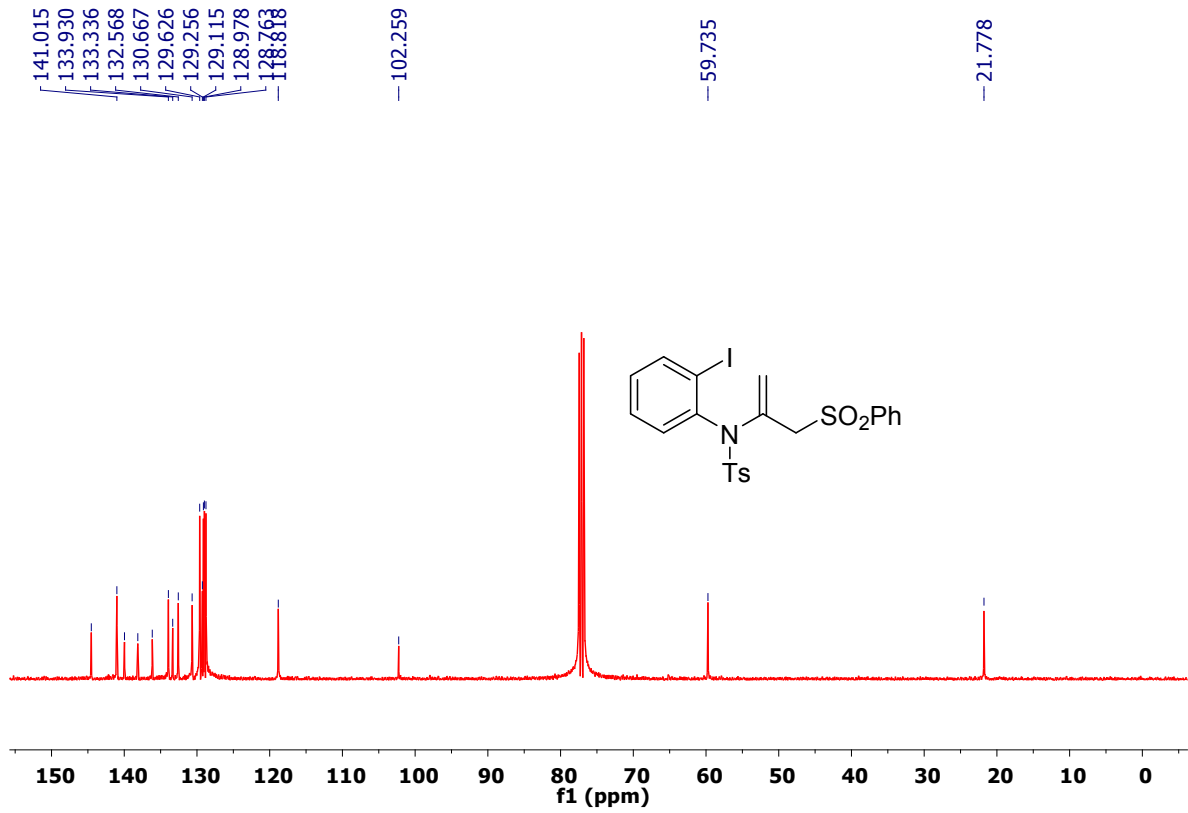



7c, CDCl<sub>3</sub>

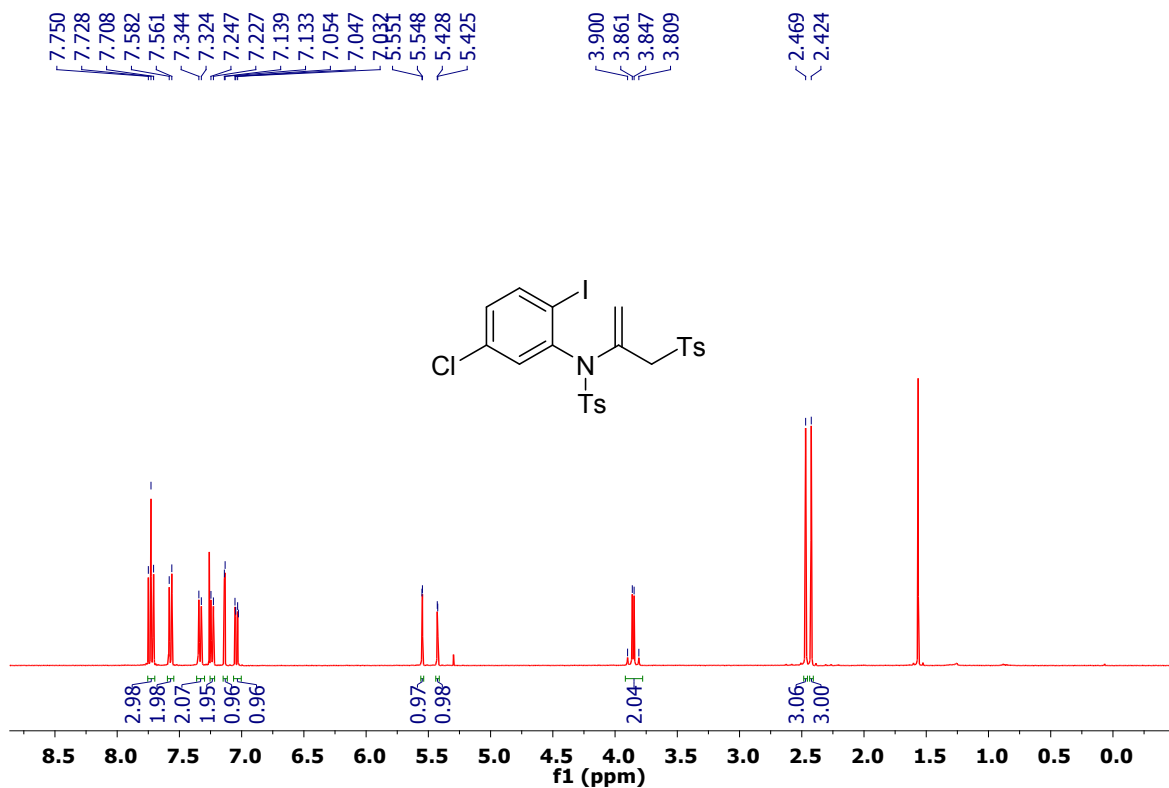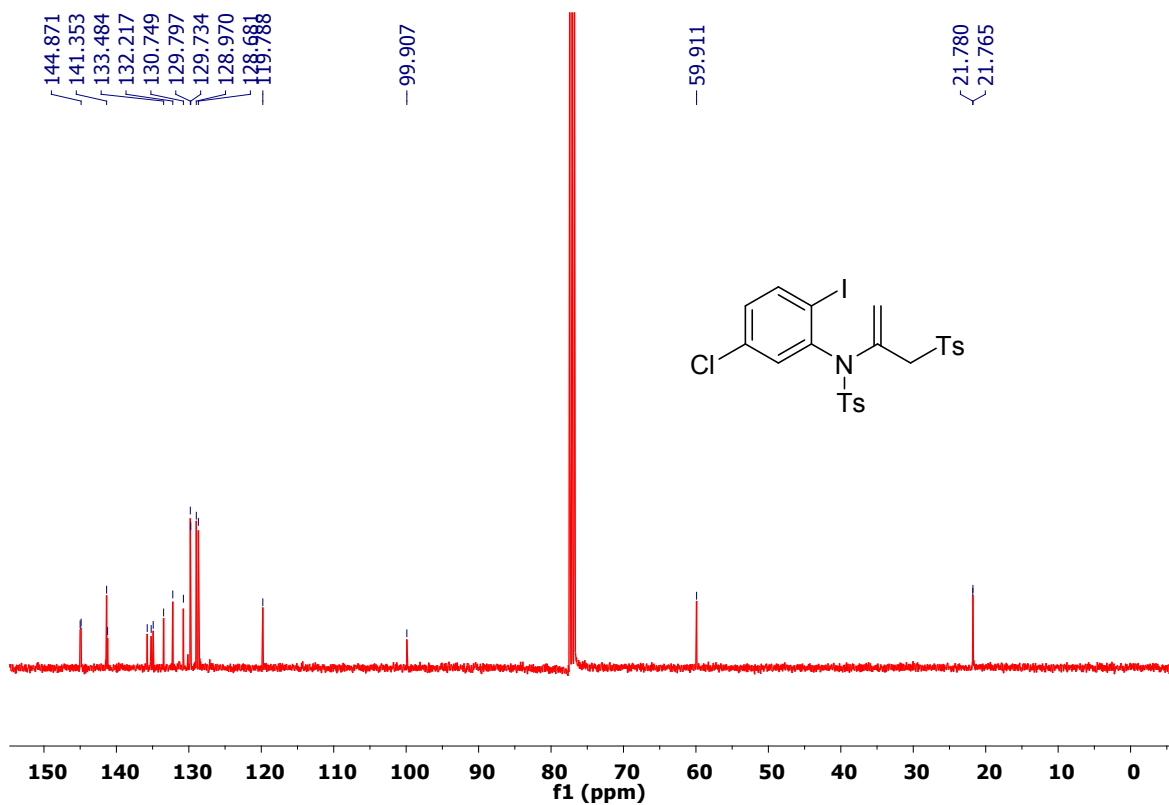

7d, CDCl<sub>3</sub>

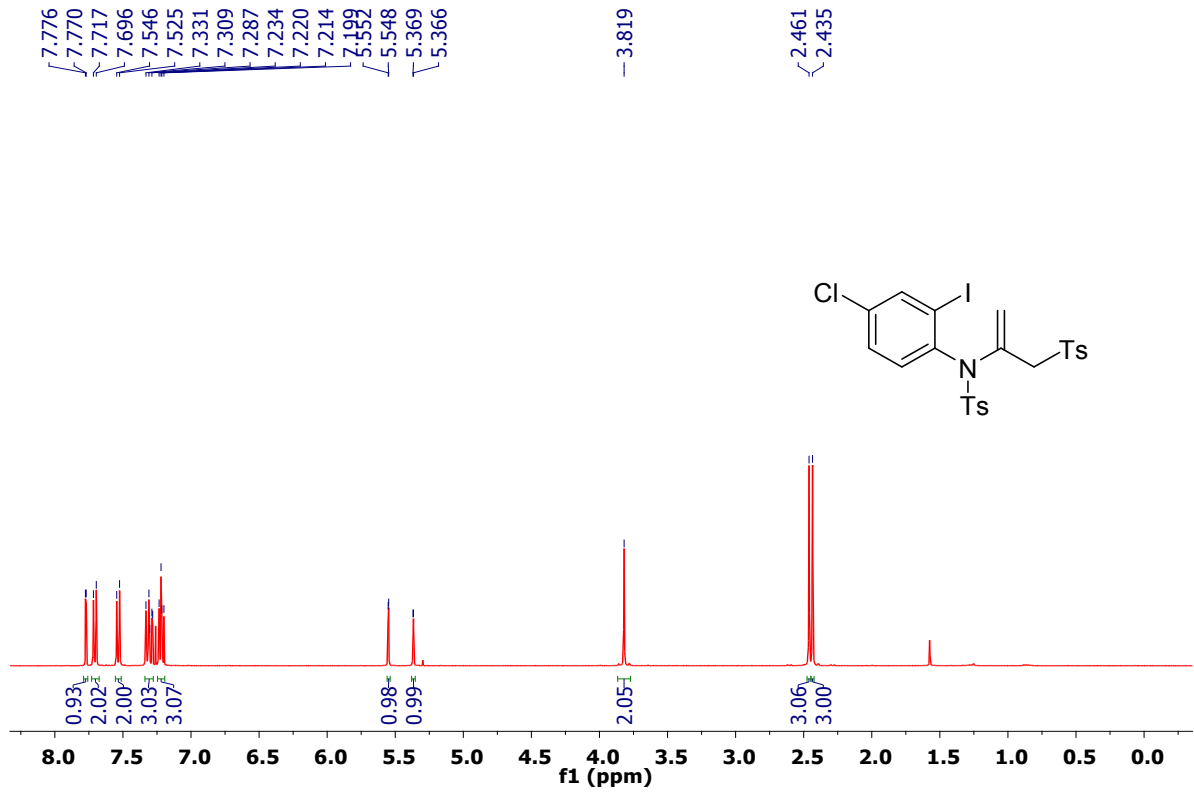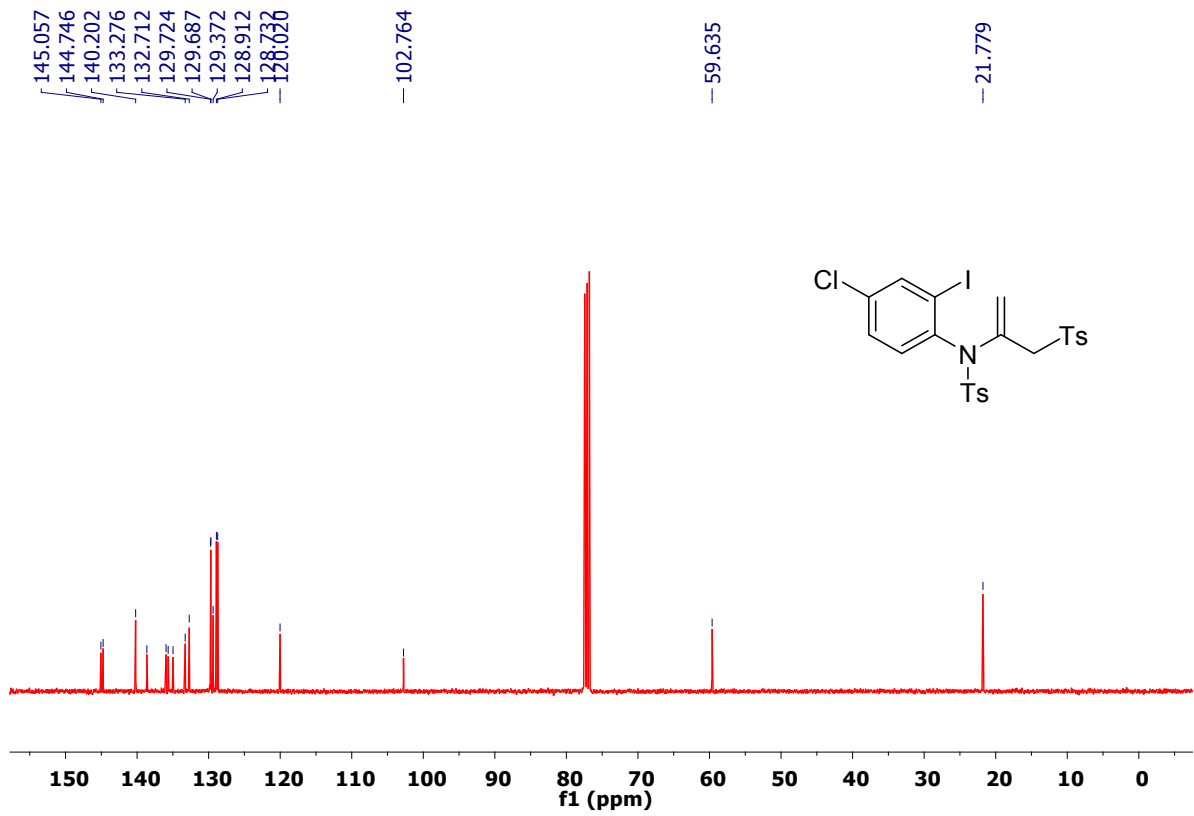

7e, CDCl<sub>3</sub>

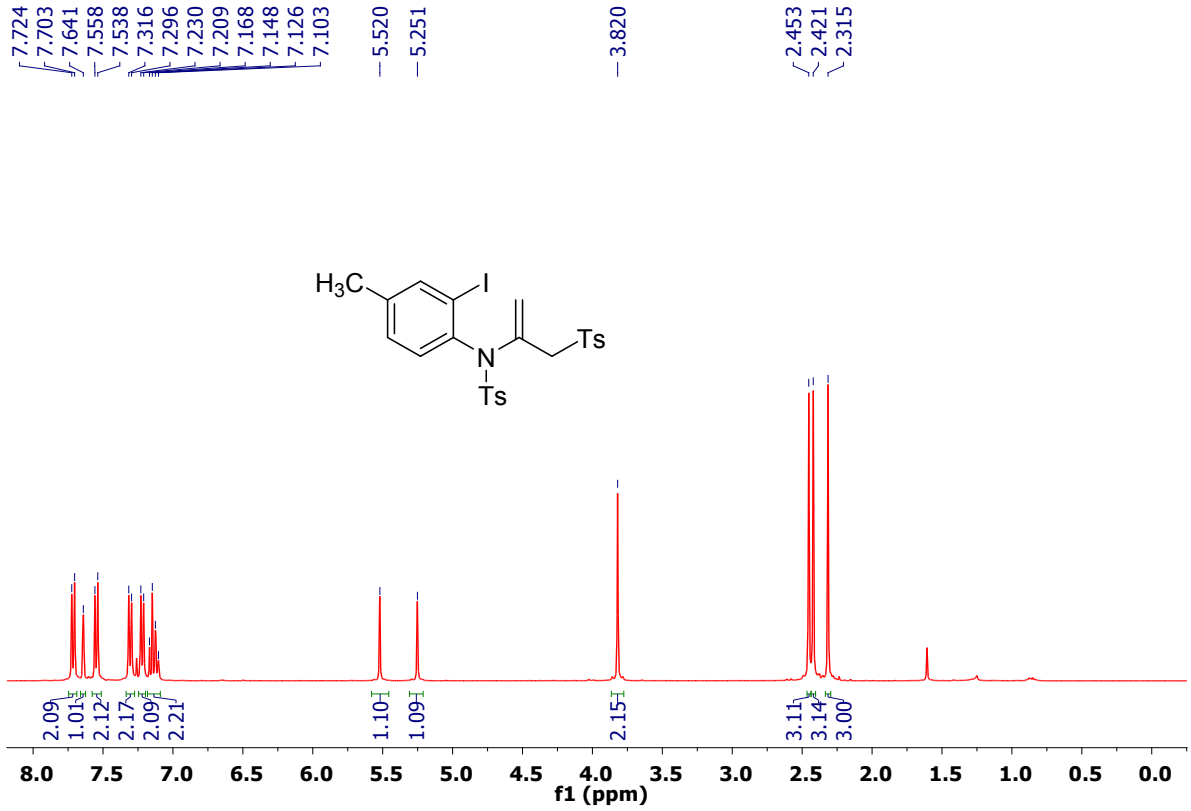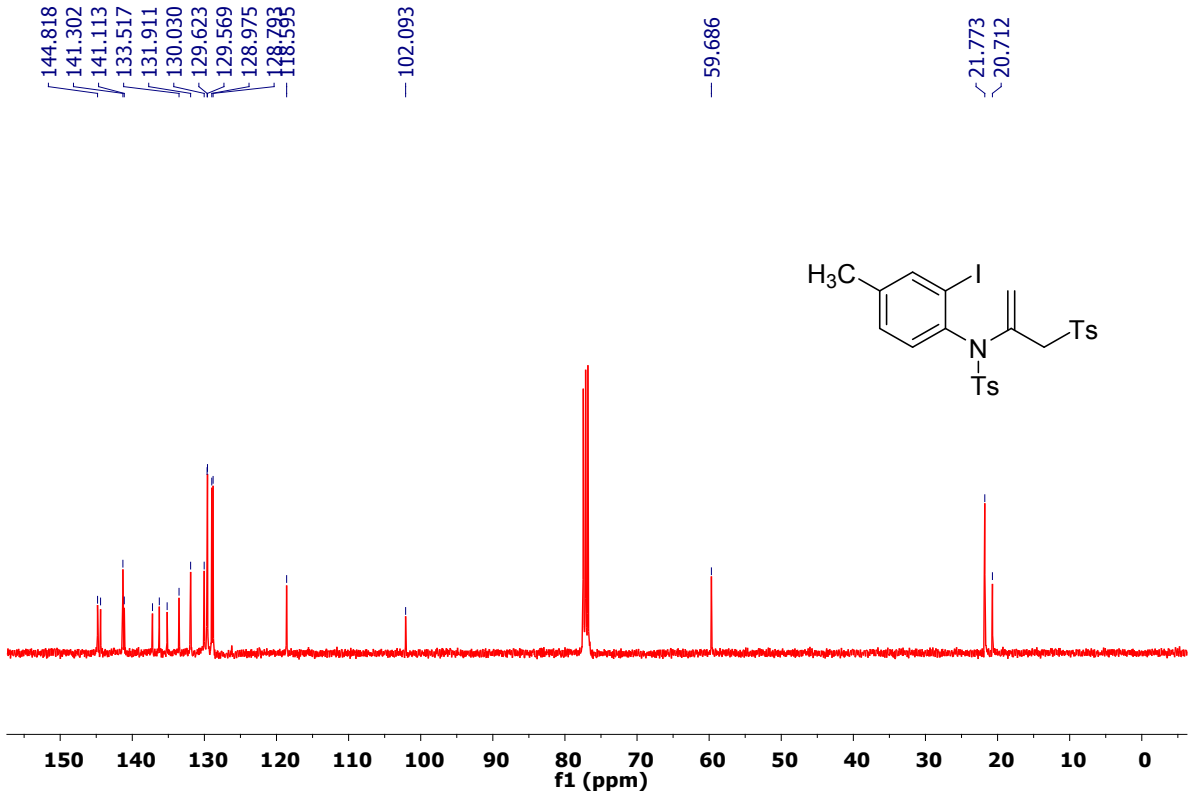

7f, CDCl<sub>3</sub>

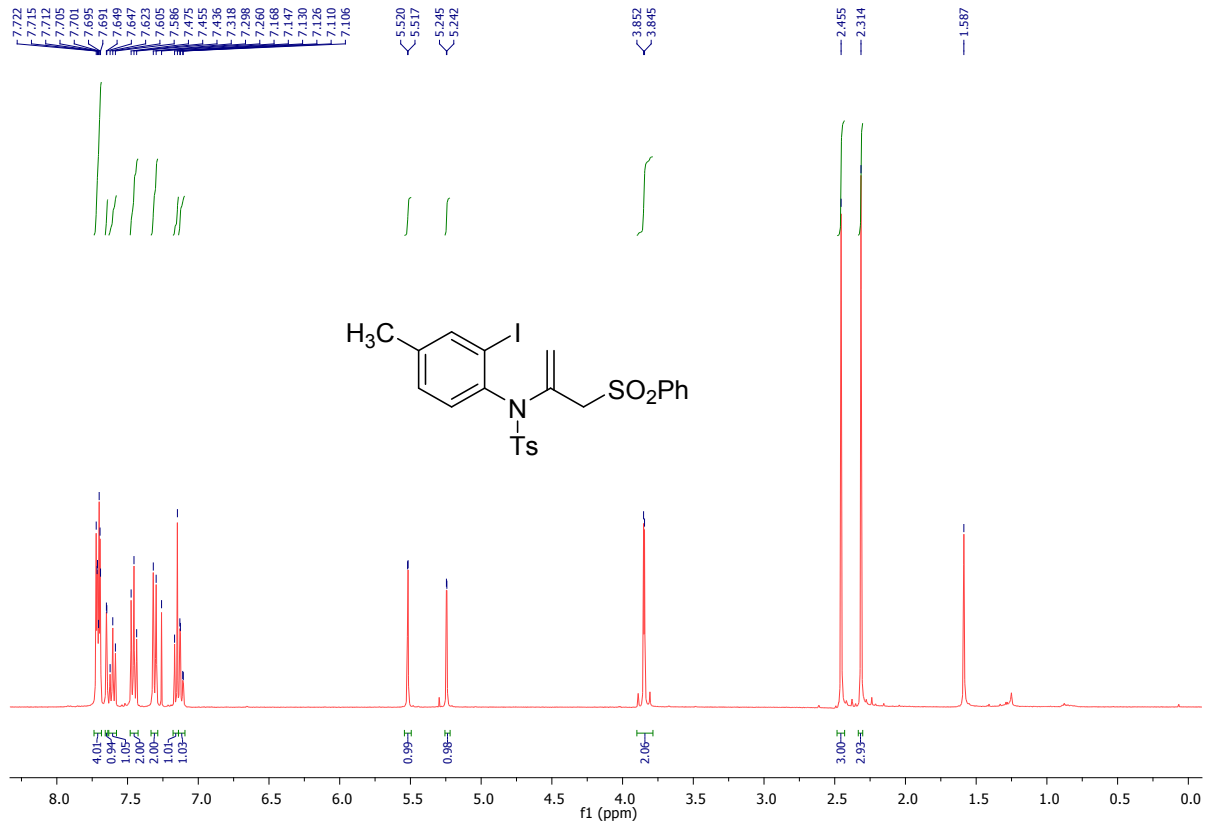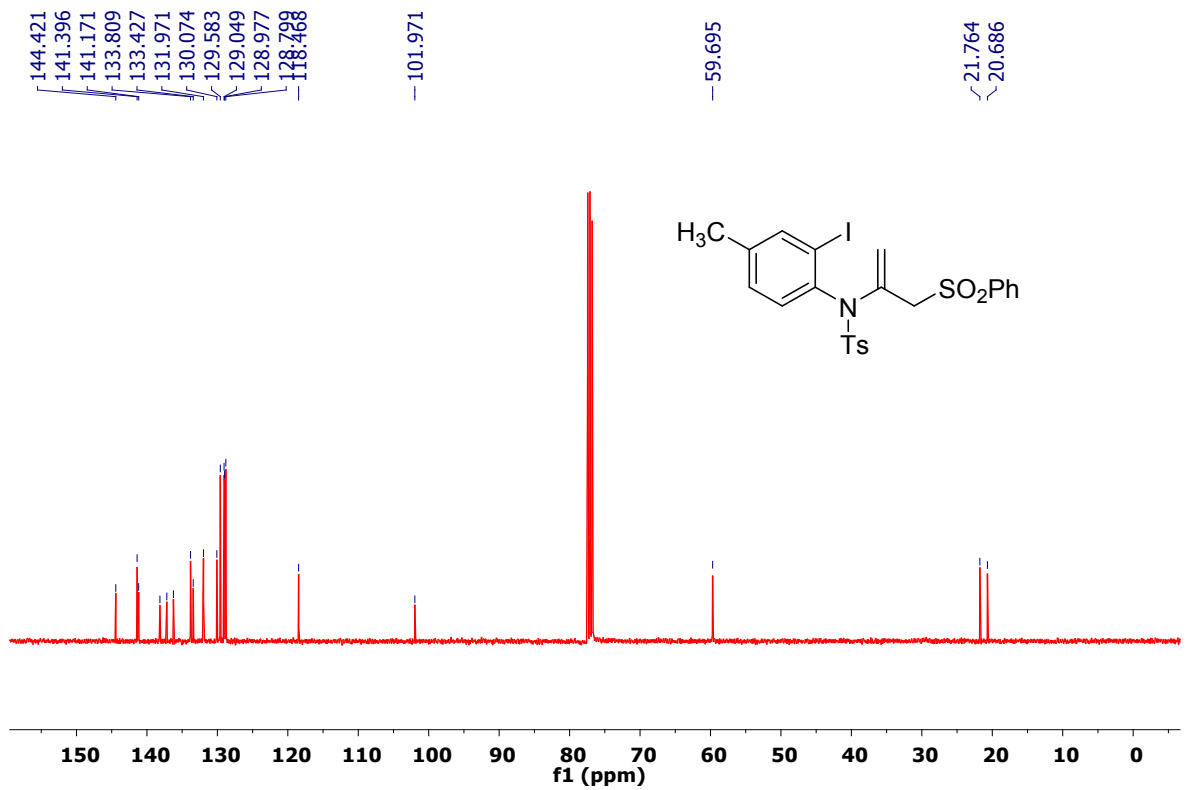

7g, CDCl<sub>3</sub>

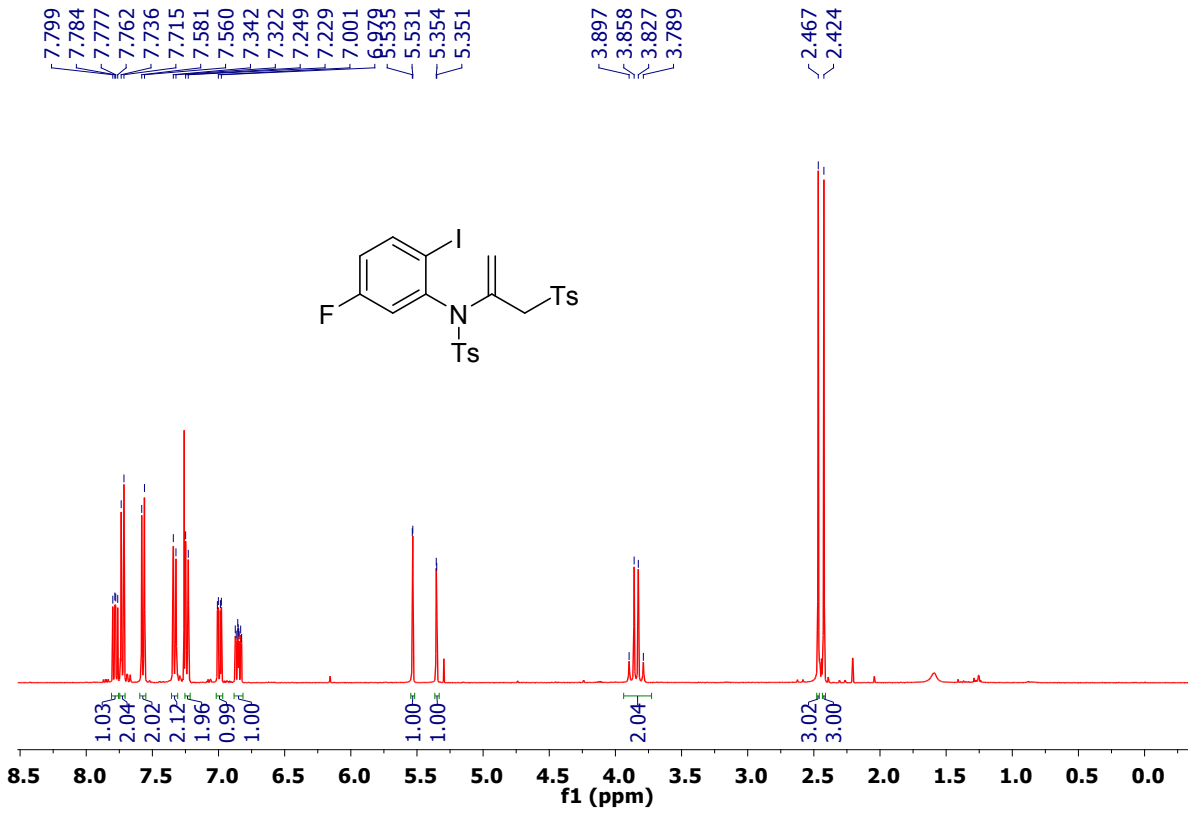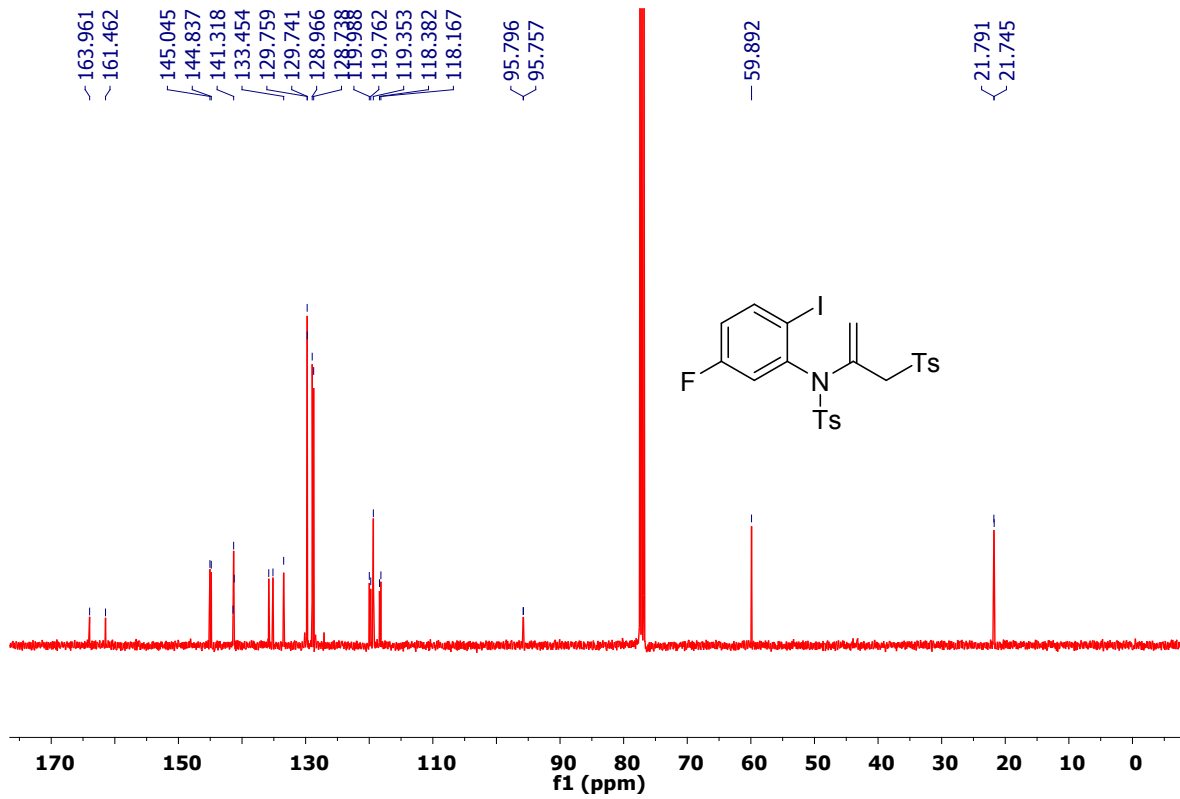

7h, CDCl<sub>3</sub>

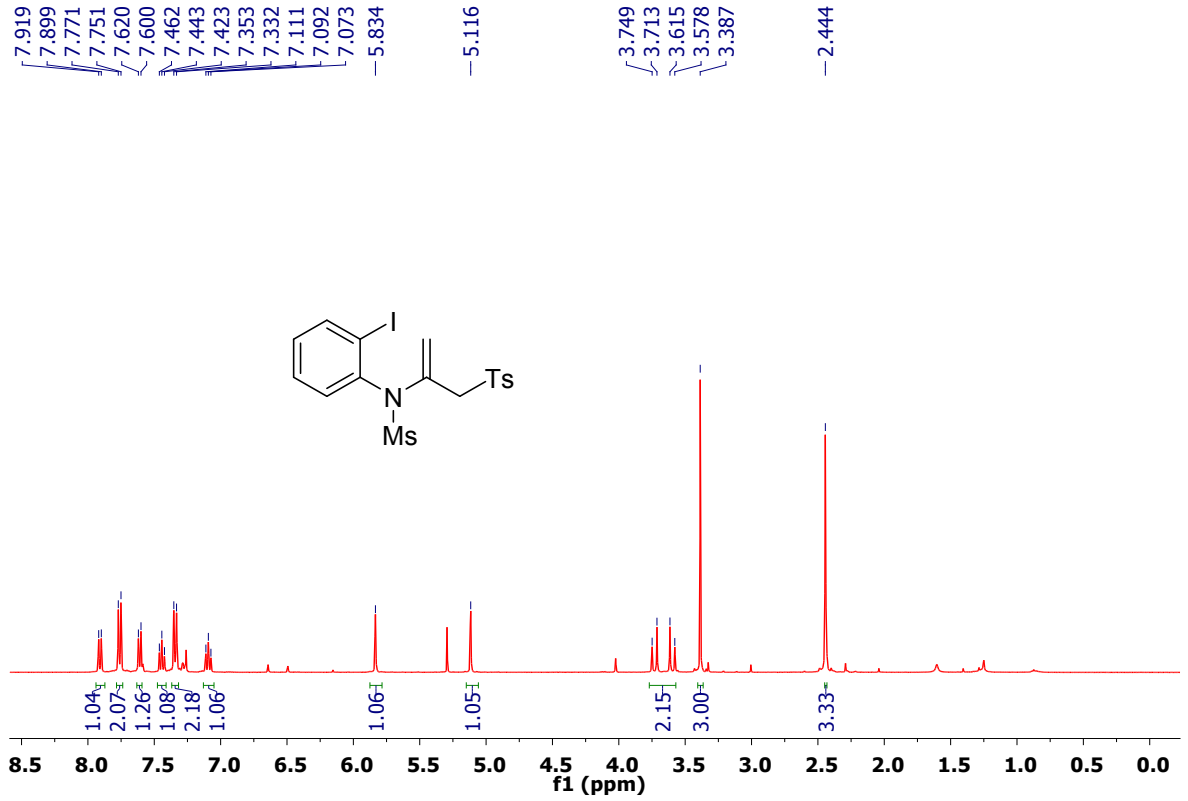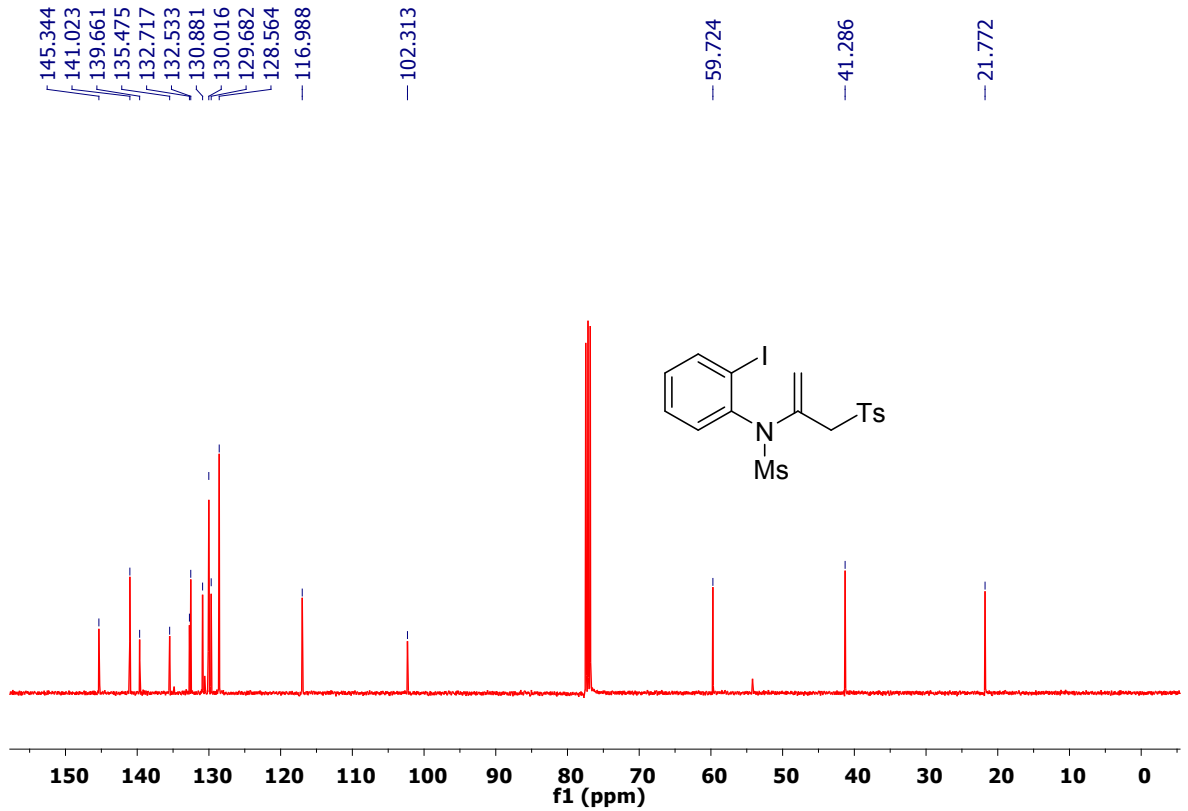

7i, CDCl<sub>3</sub>

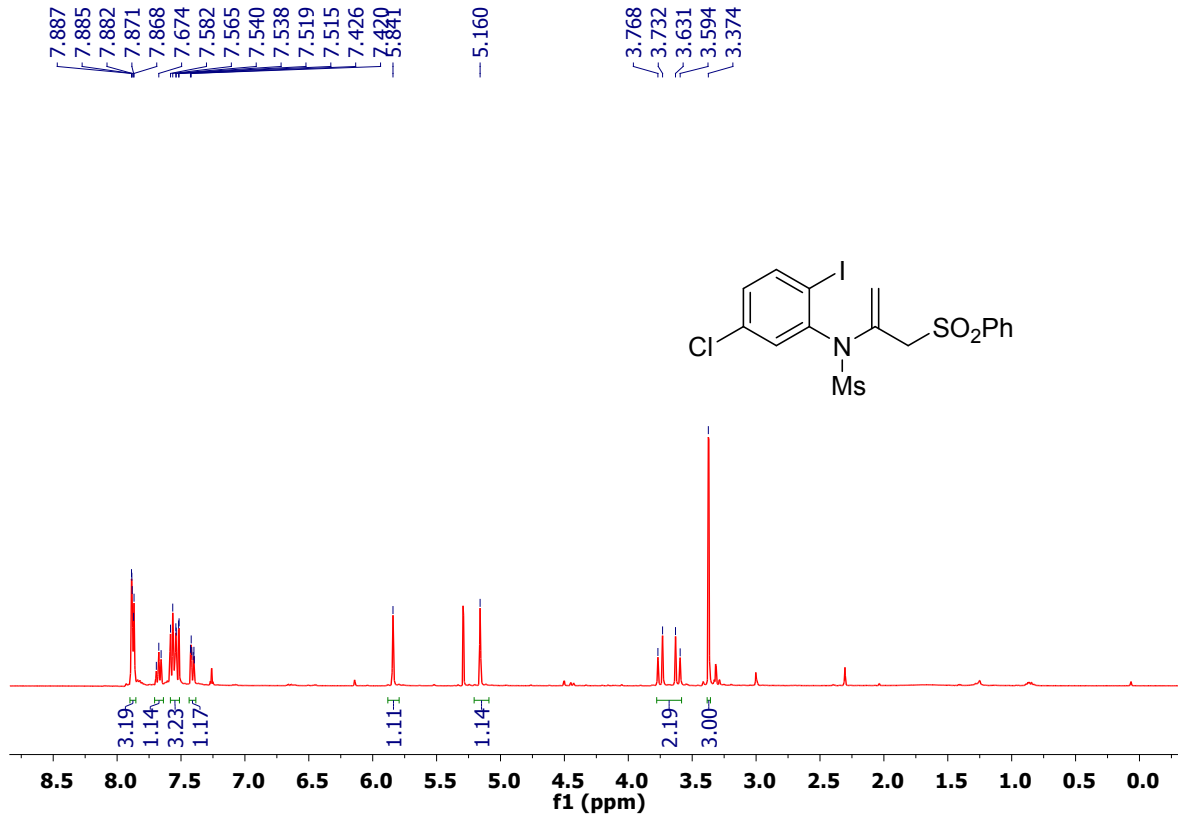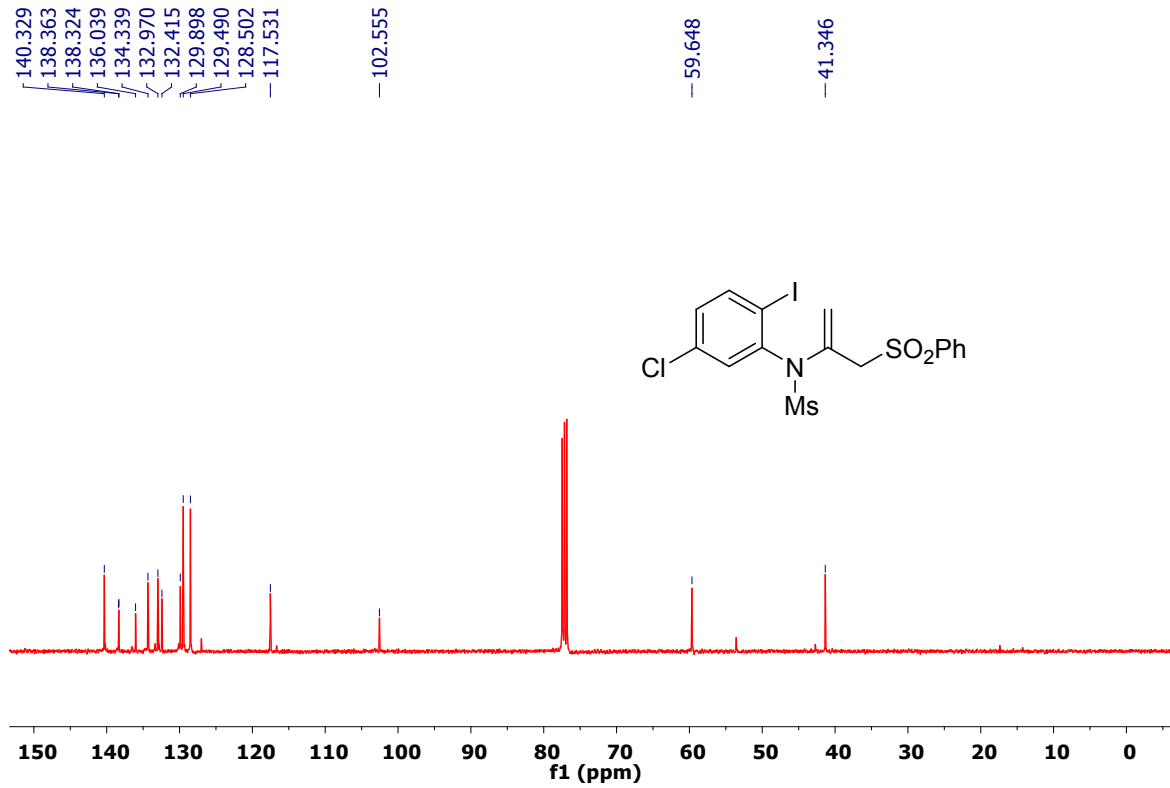

7j, CDCl<sub>3</sub>

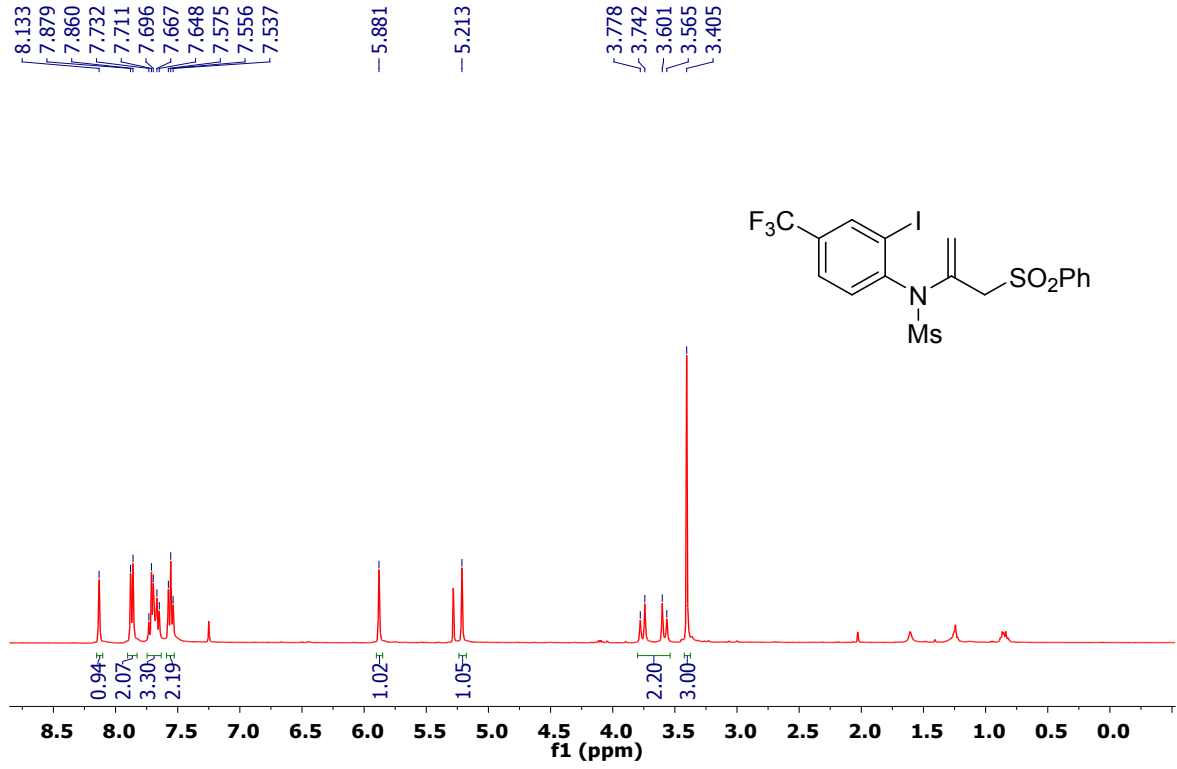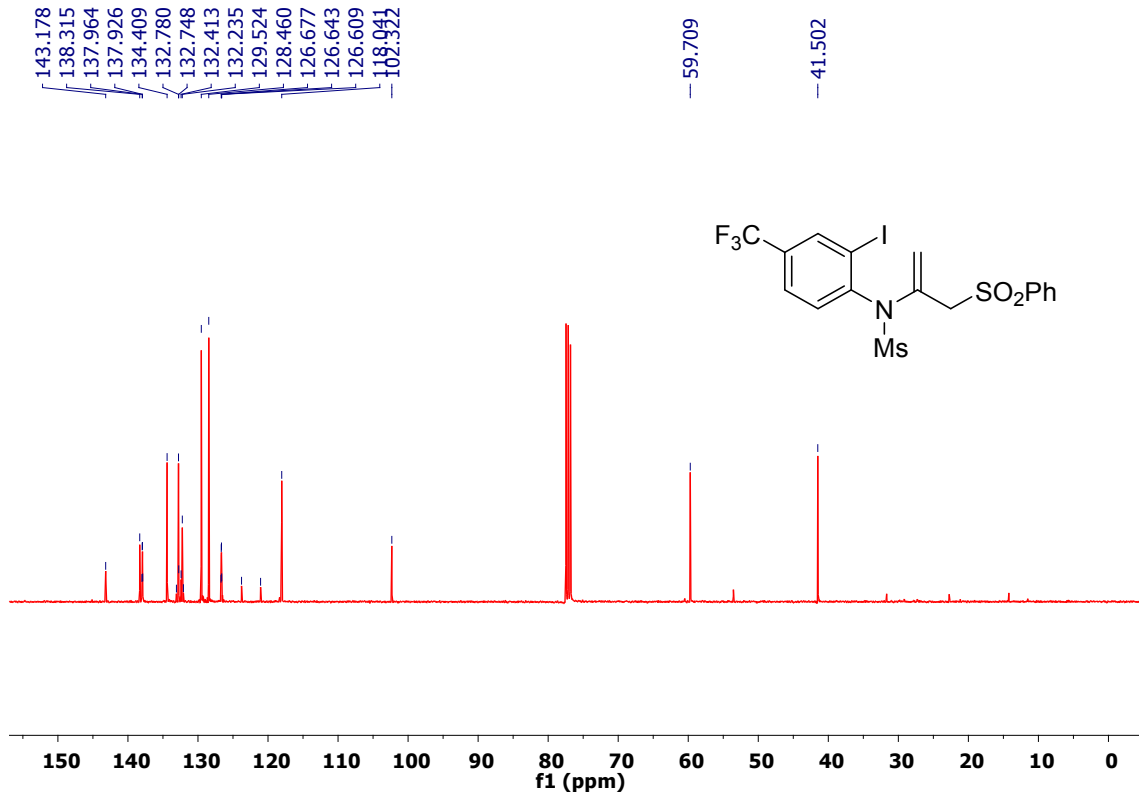



7k, CDCl<sub>3</sub>

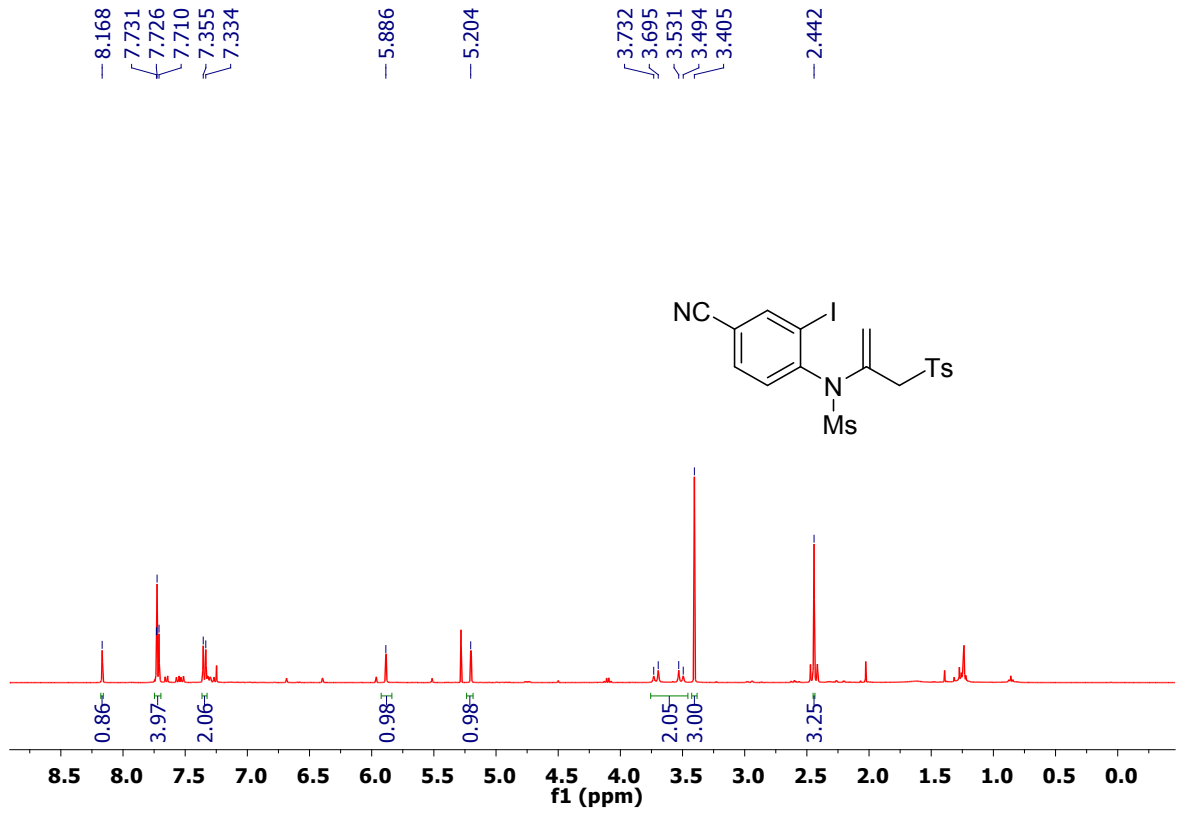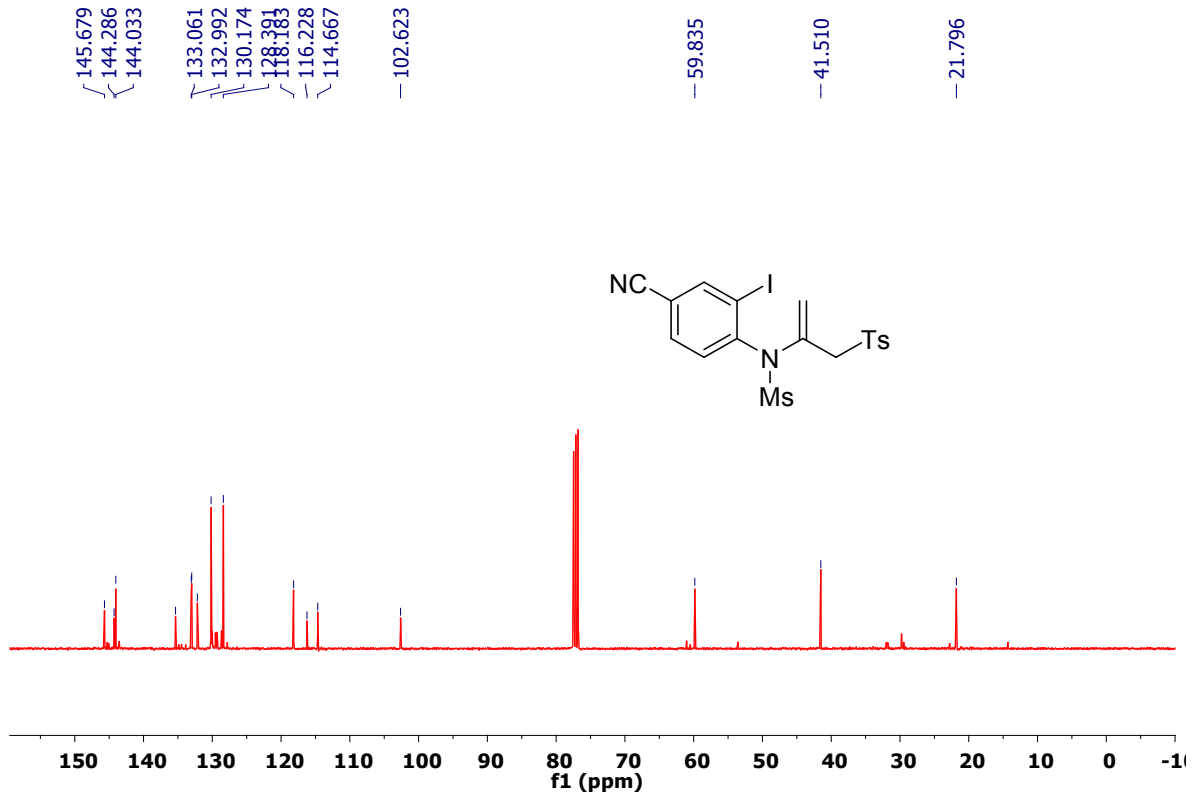

7l, CDCl<sub>3</sub>

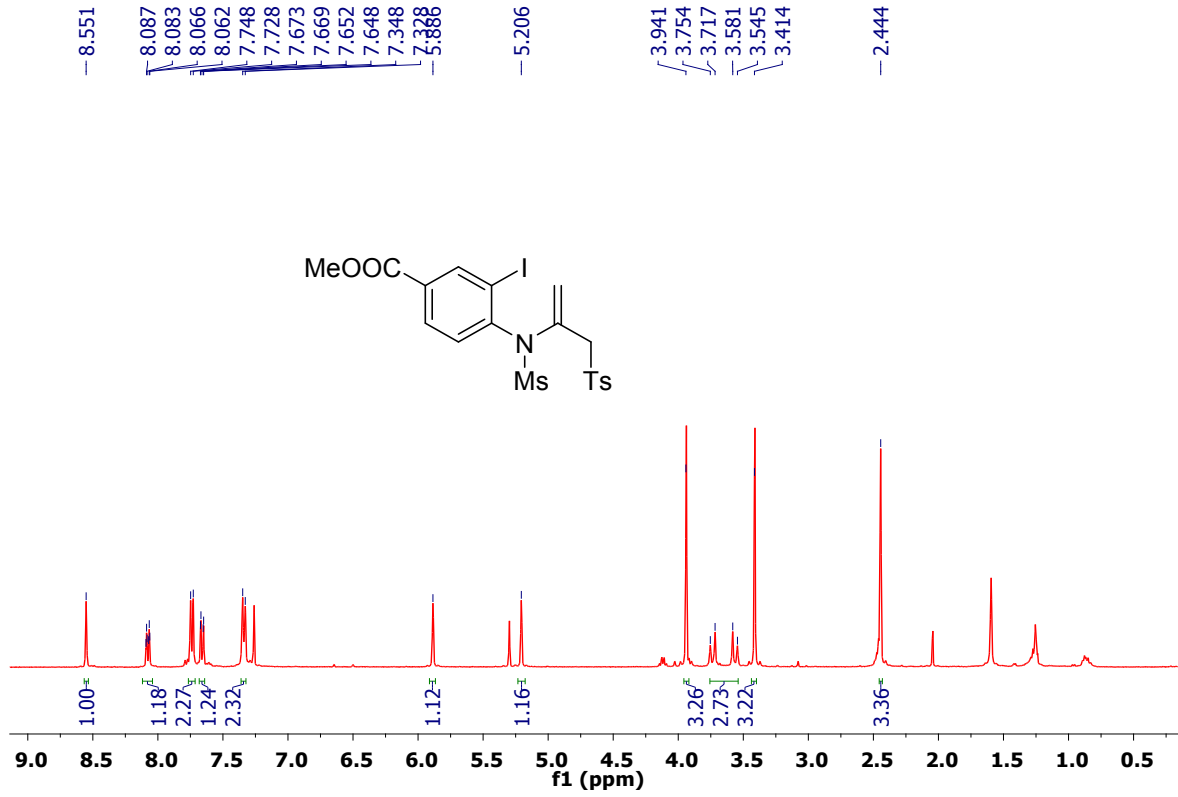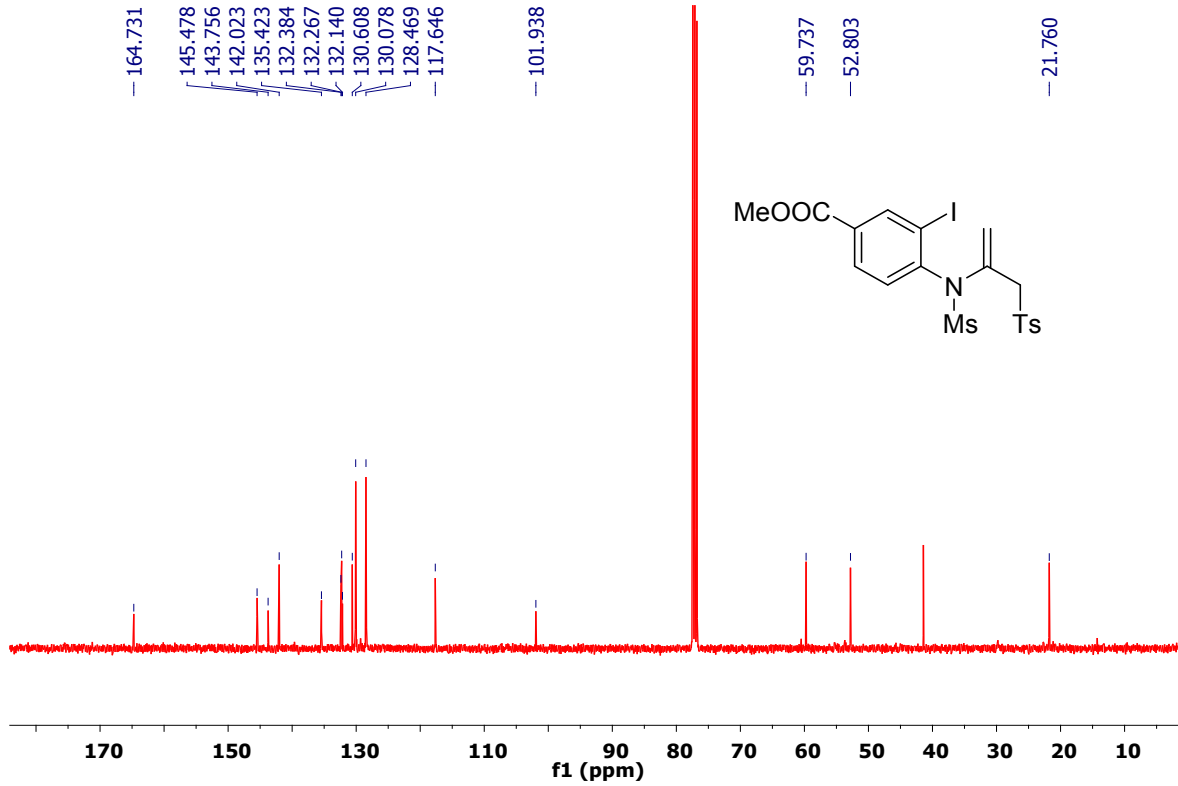

8a, CDCl<sub>3</sub>

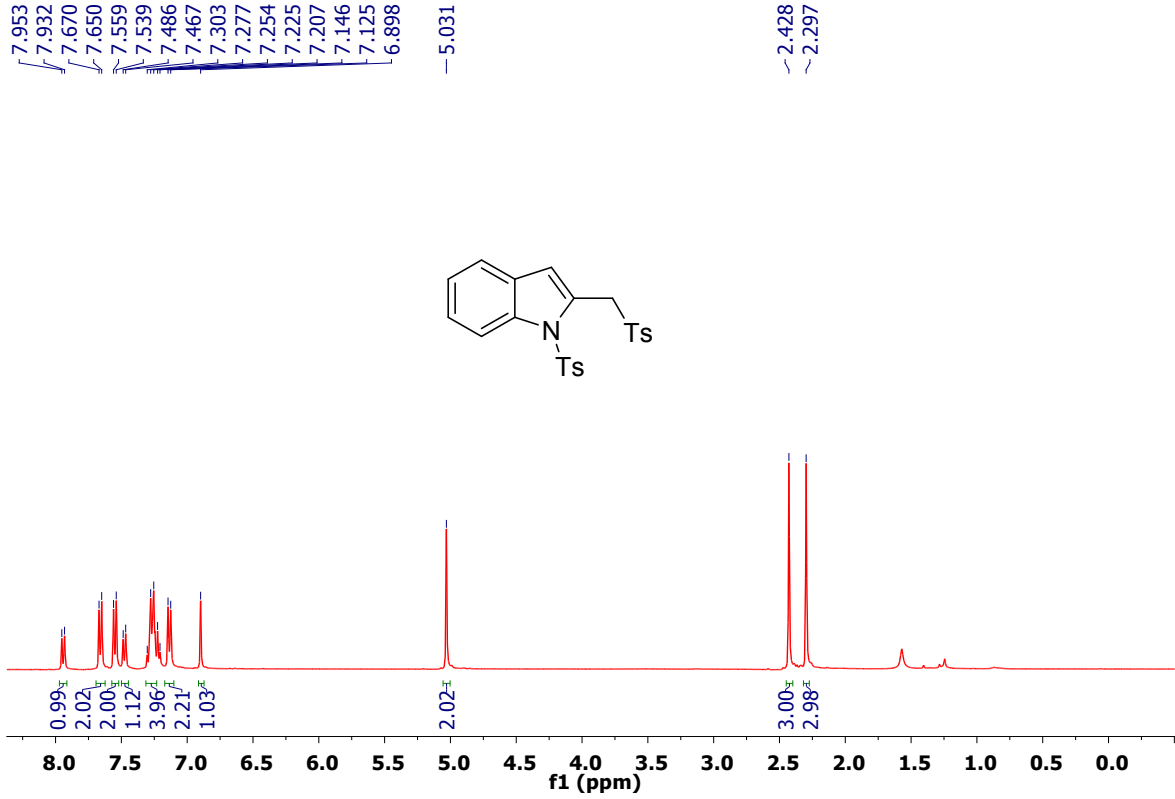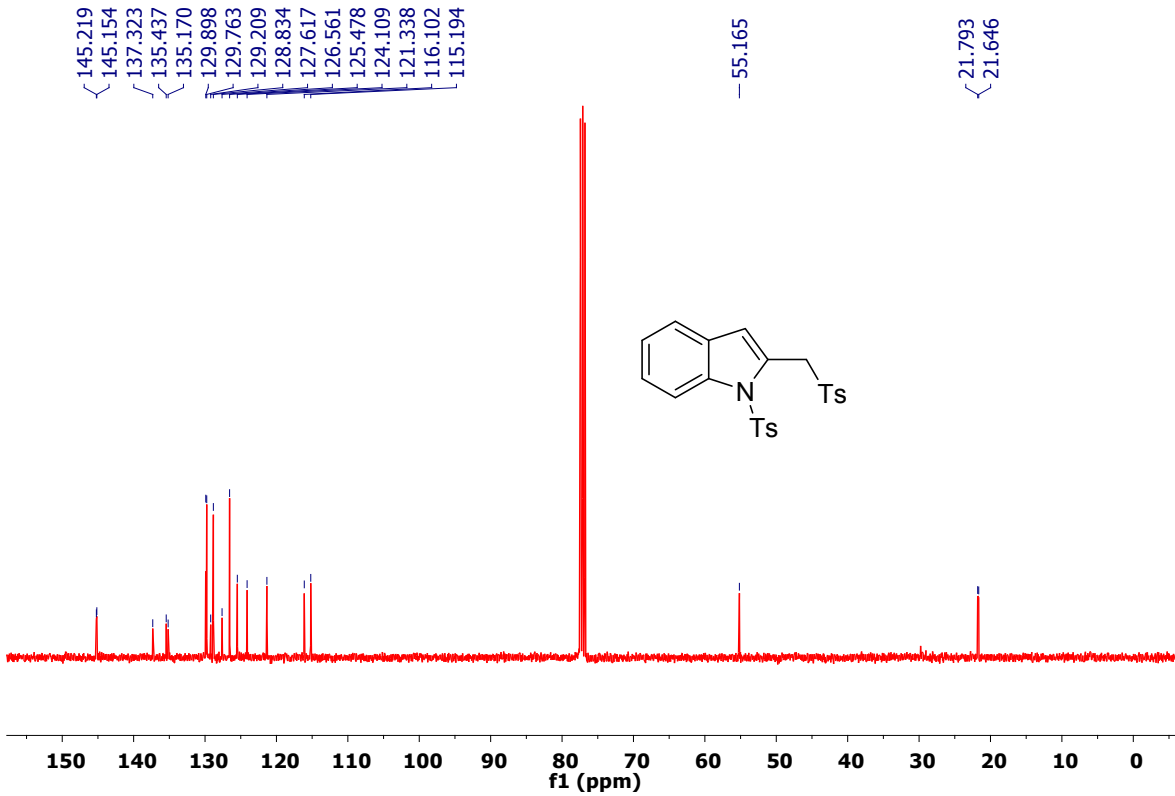

8a, CDCl<sub>3</sub>, DEPT-135

129.900  
129.765  
128.839  
126.565  
125.480  
124.111  
121.339  
116.101  
115.197

-55.234

21.798  
21.649

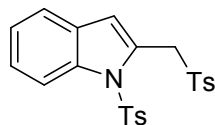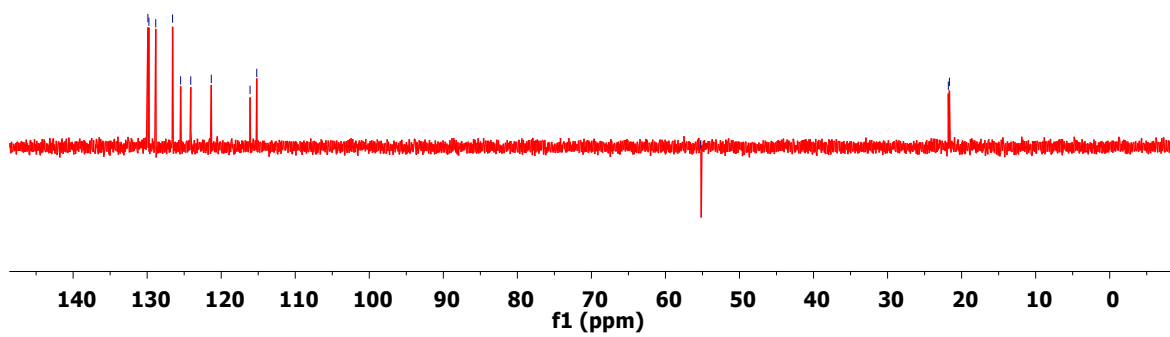

8b, CDCl<sub>3</sub>

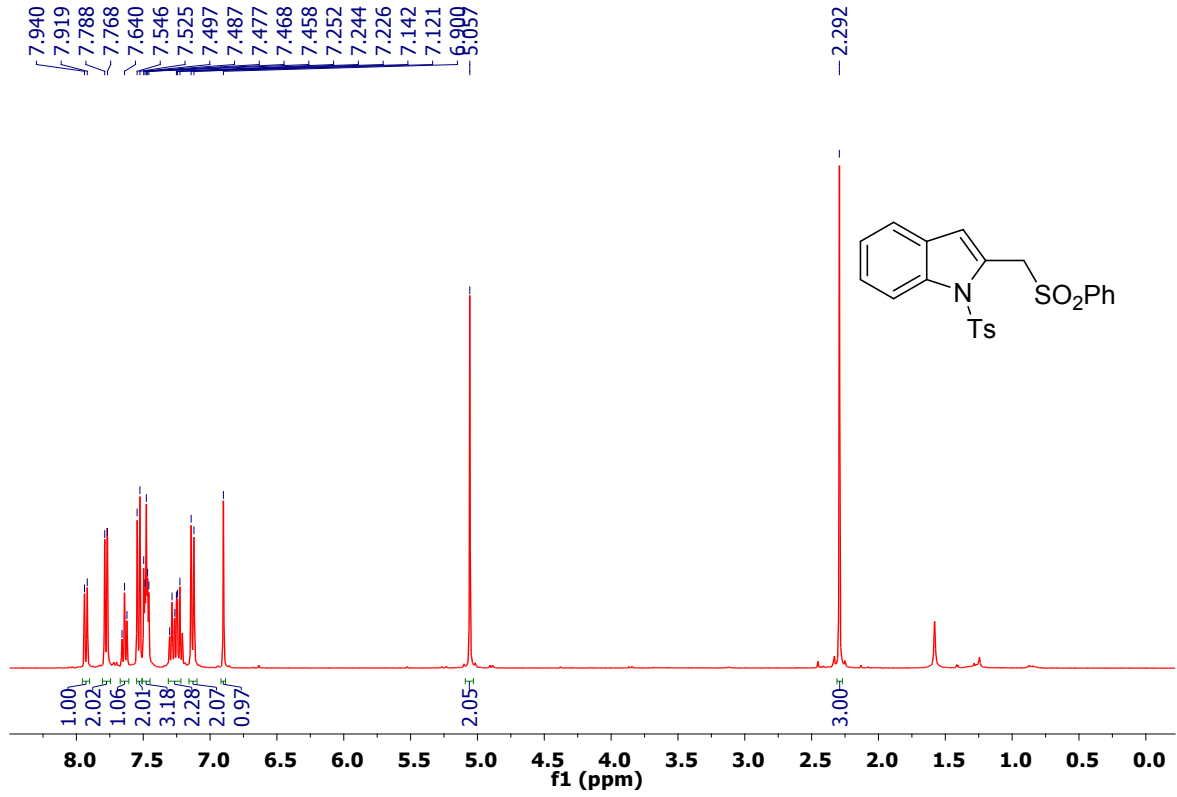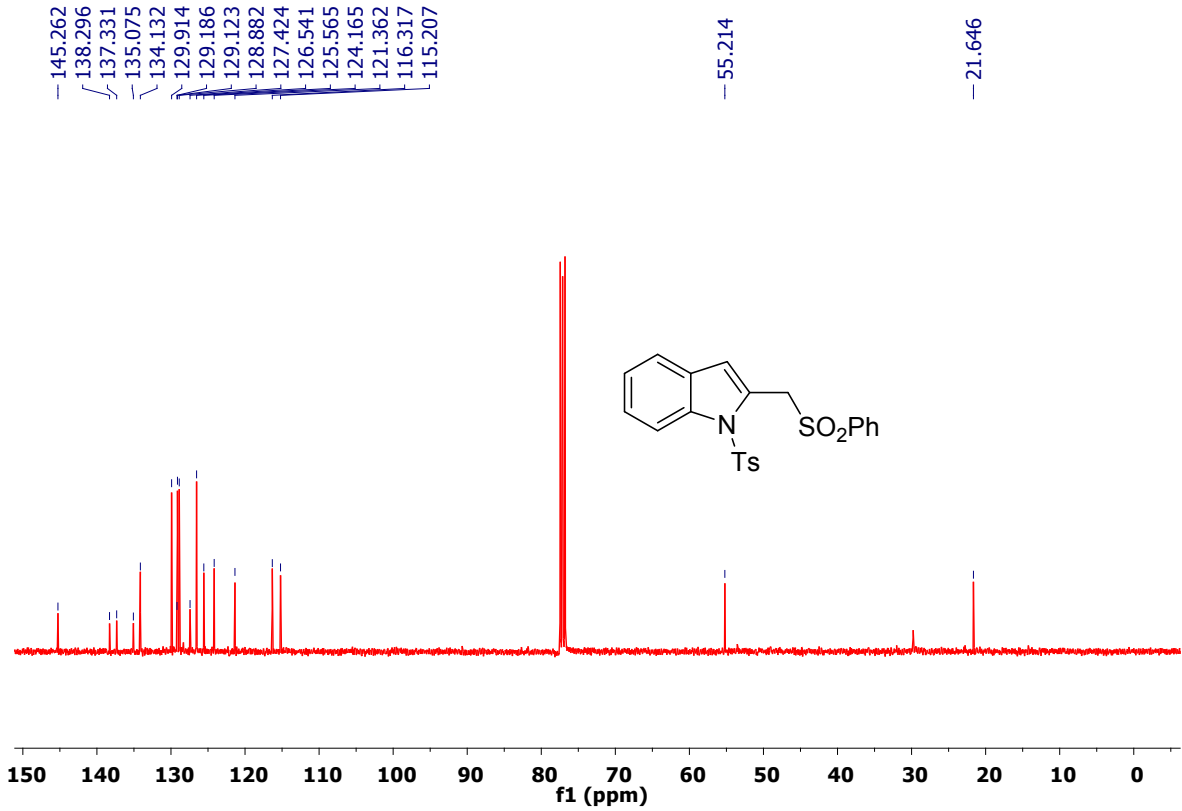

8c, CDCl<sub>3</sub>

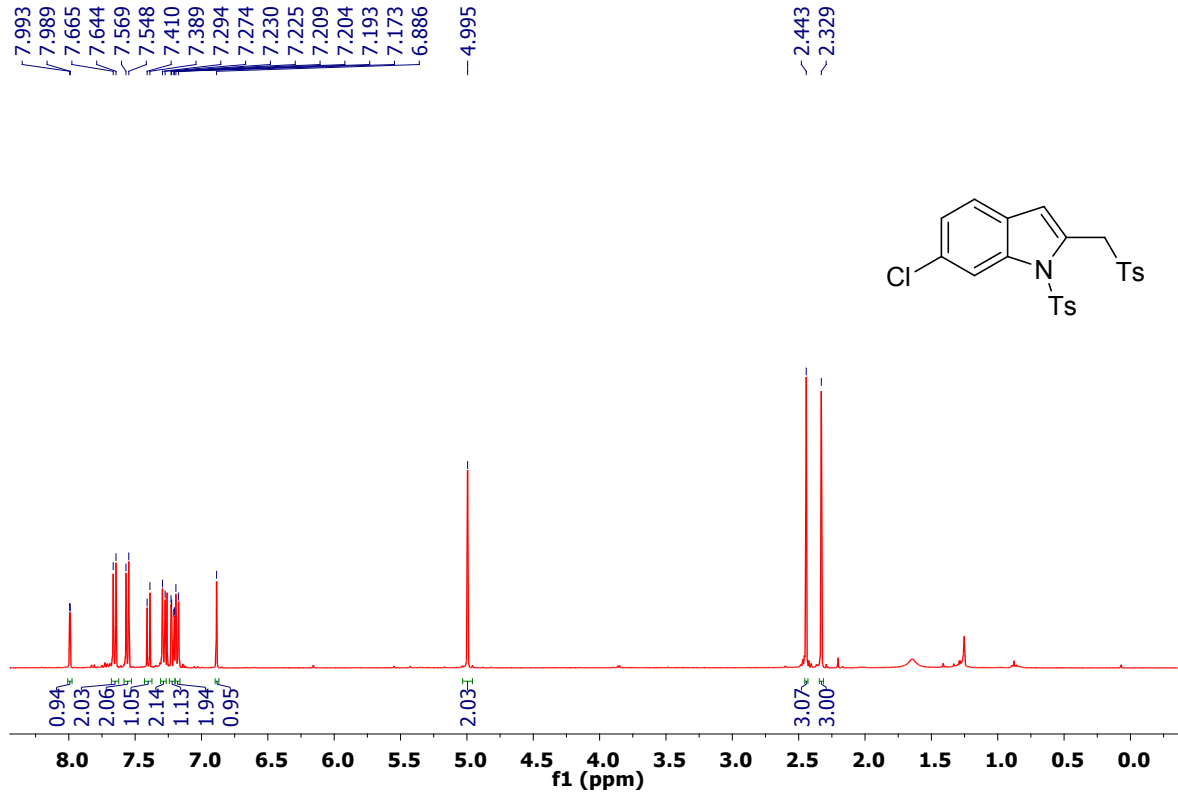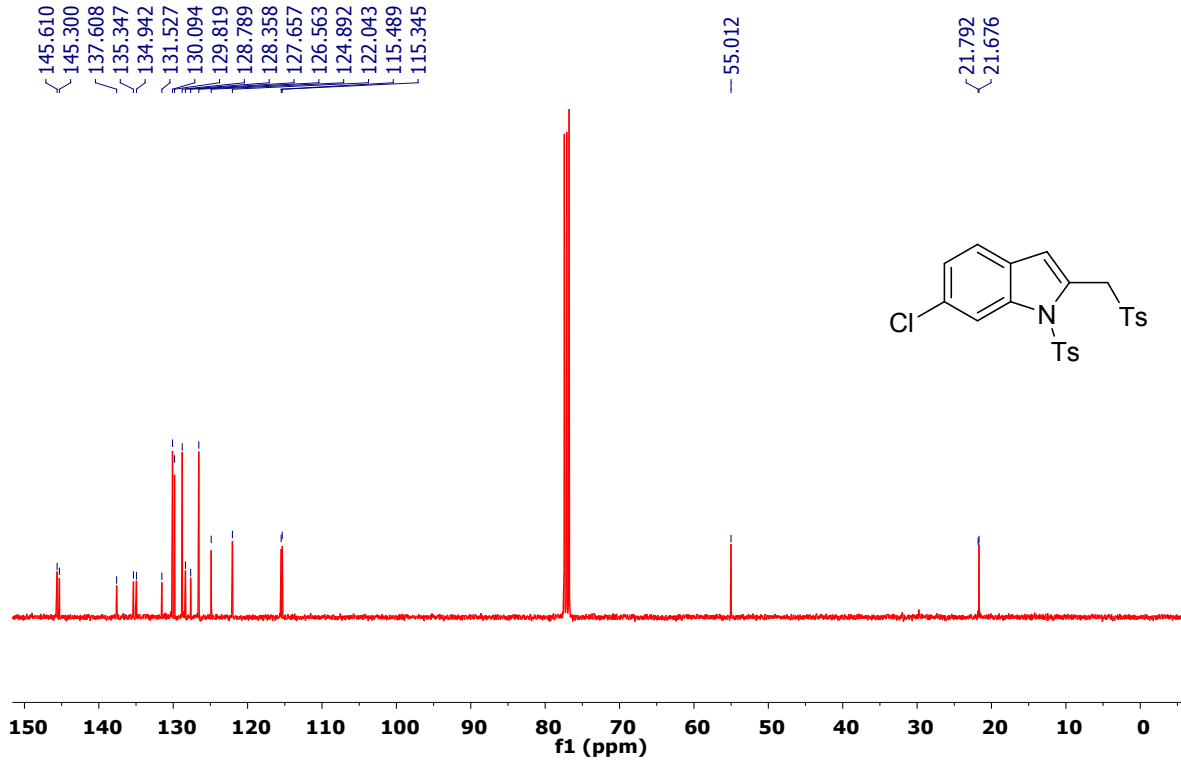

8d, CDCl<sub>3</sub>

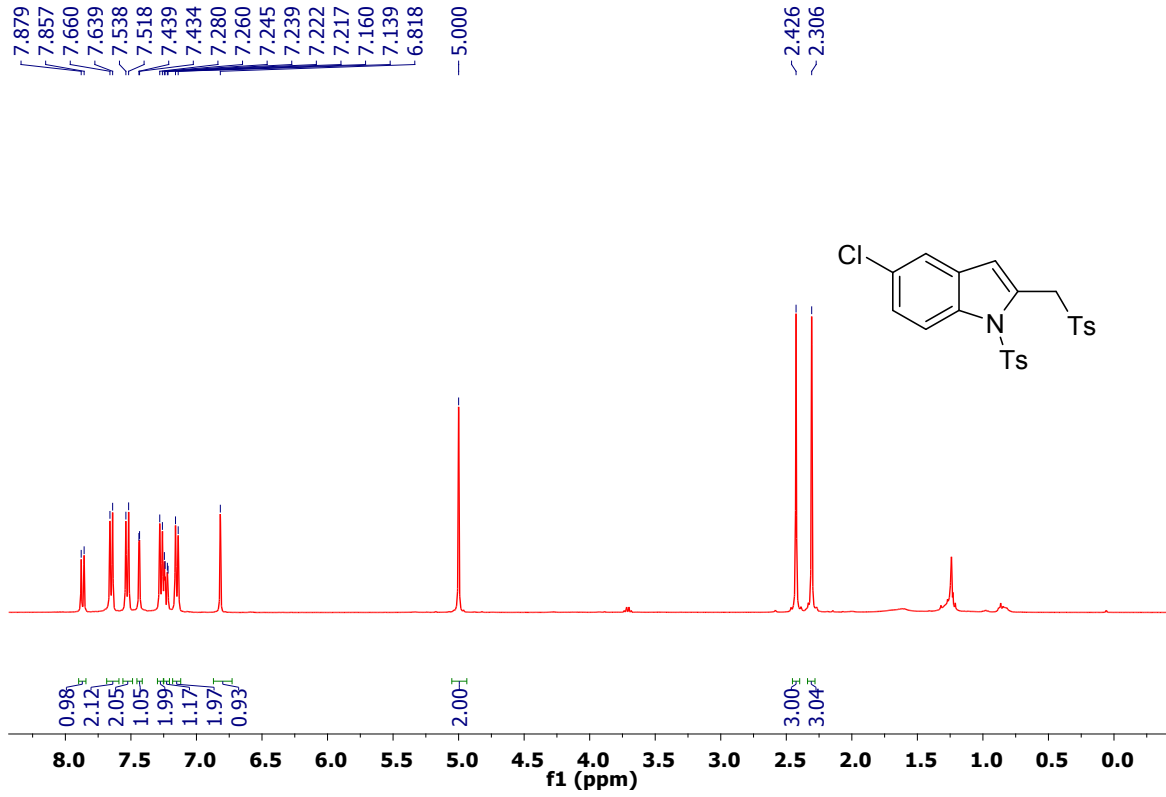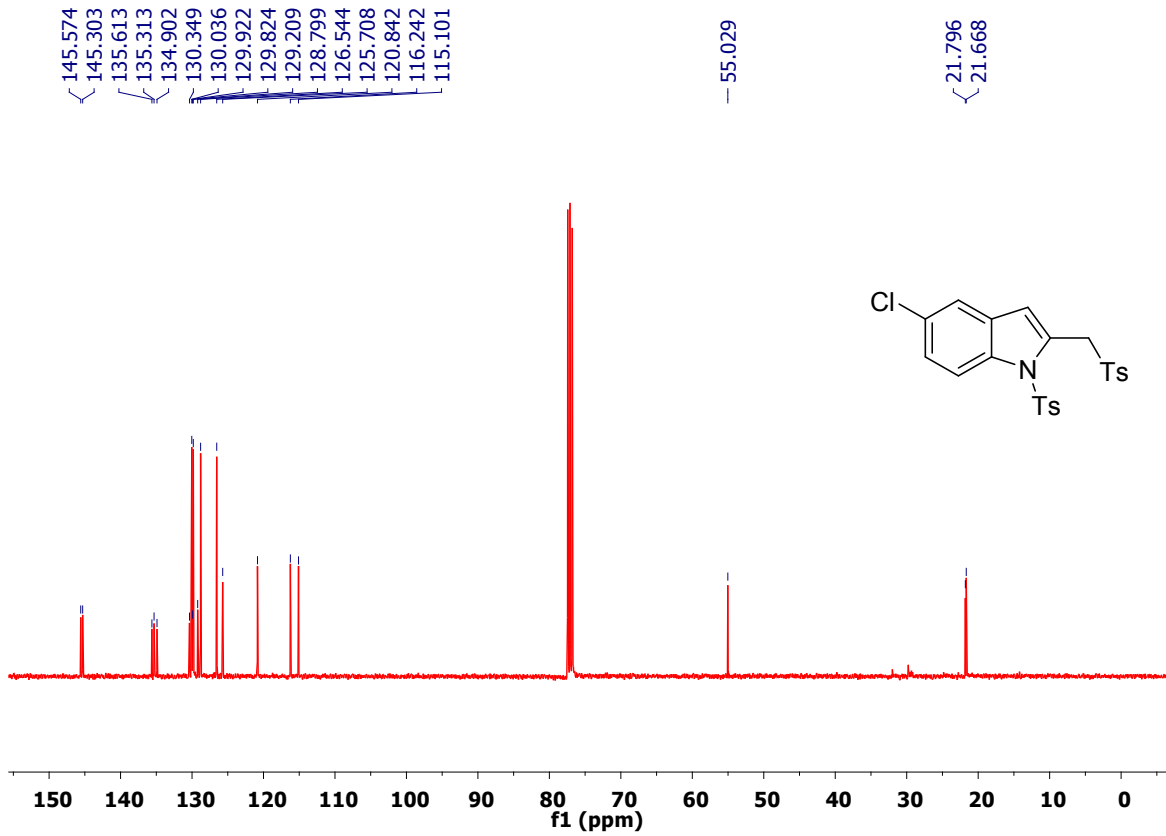

8e, CDCl<sub>3</sub>

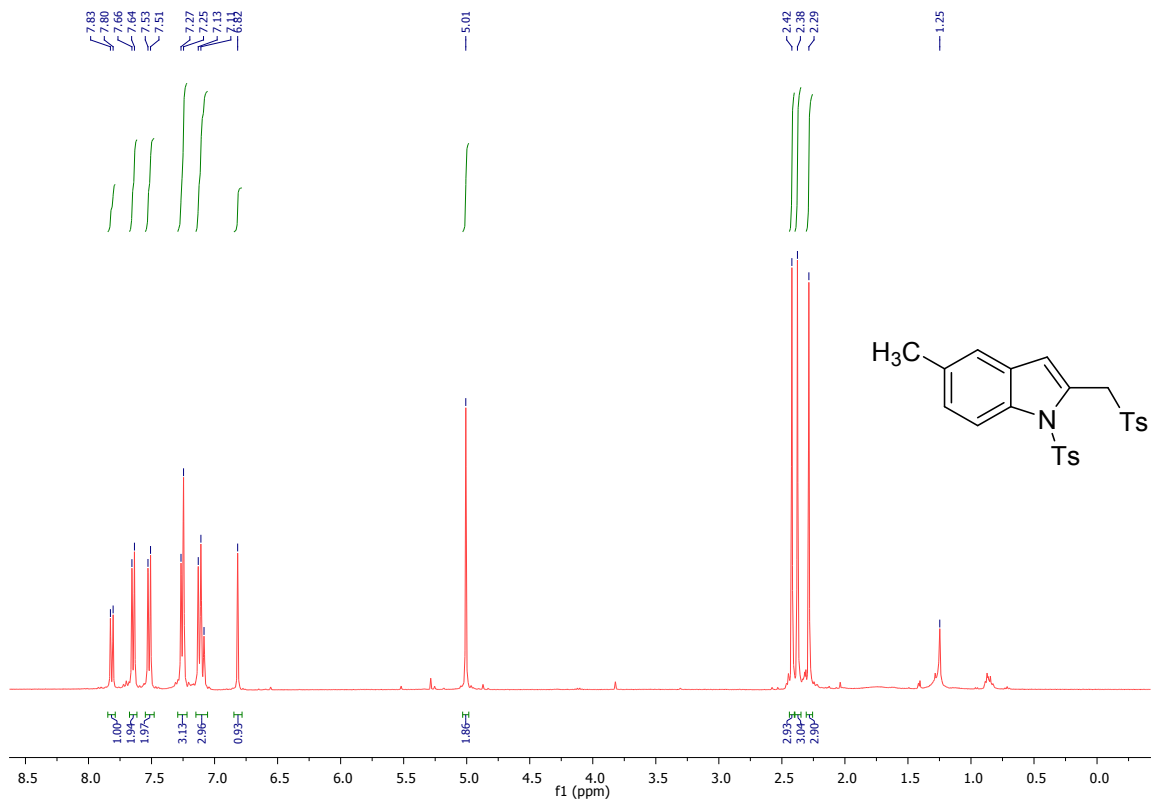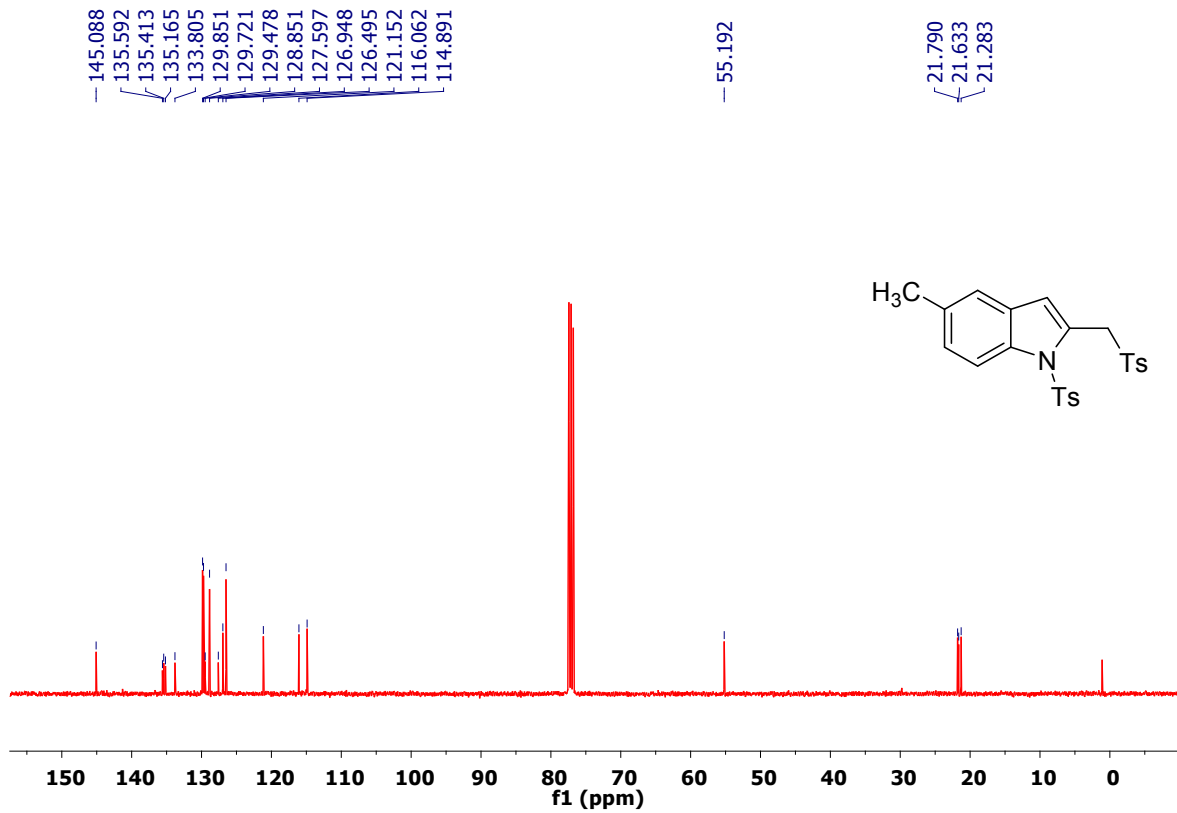



8f, CDCl<sub>3</sub>

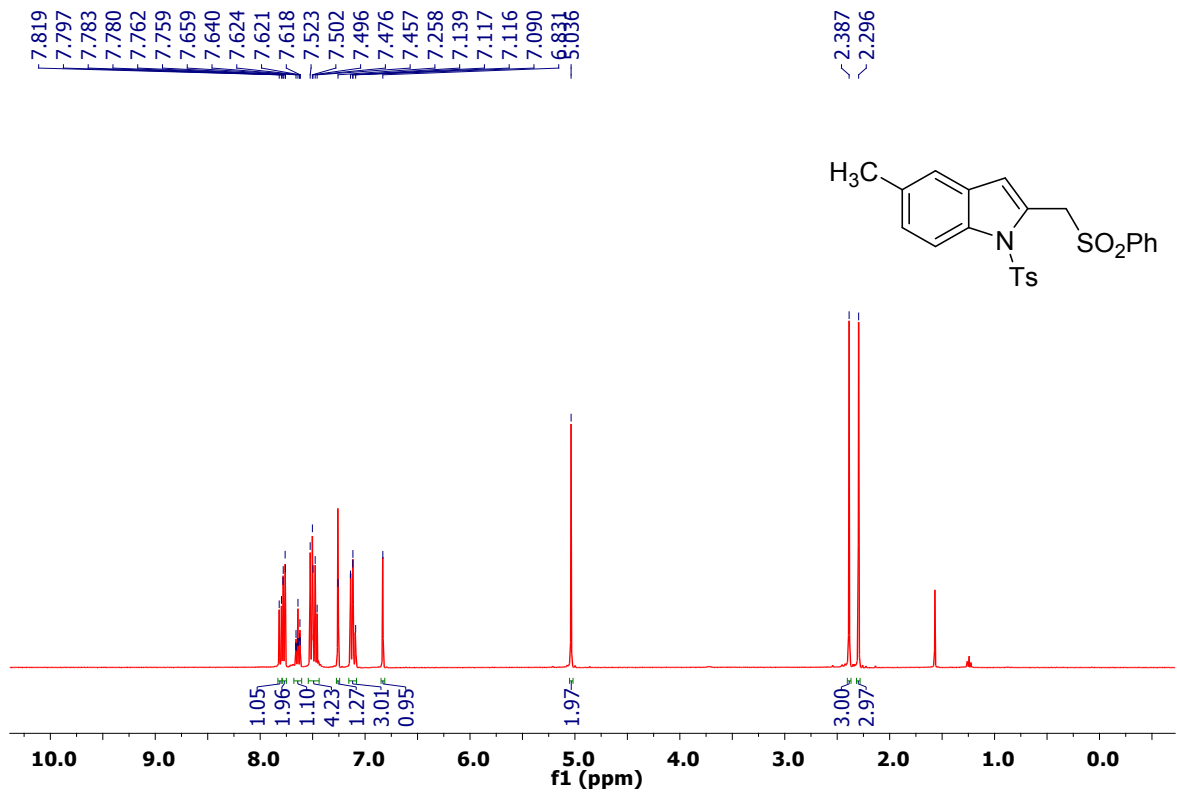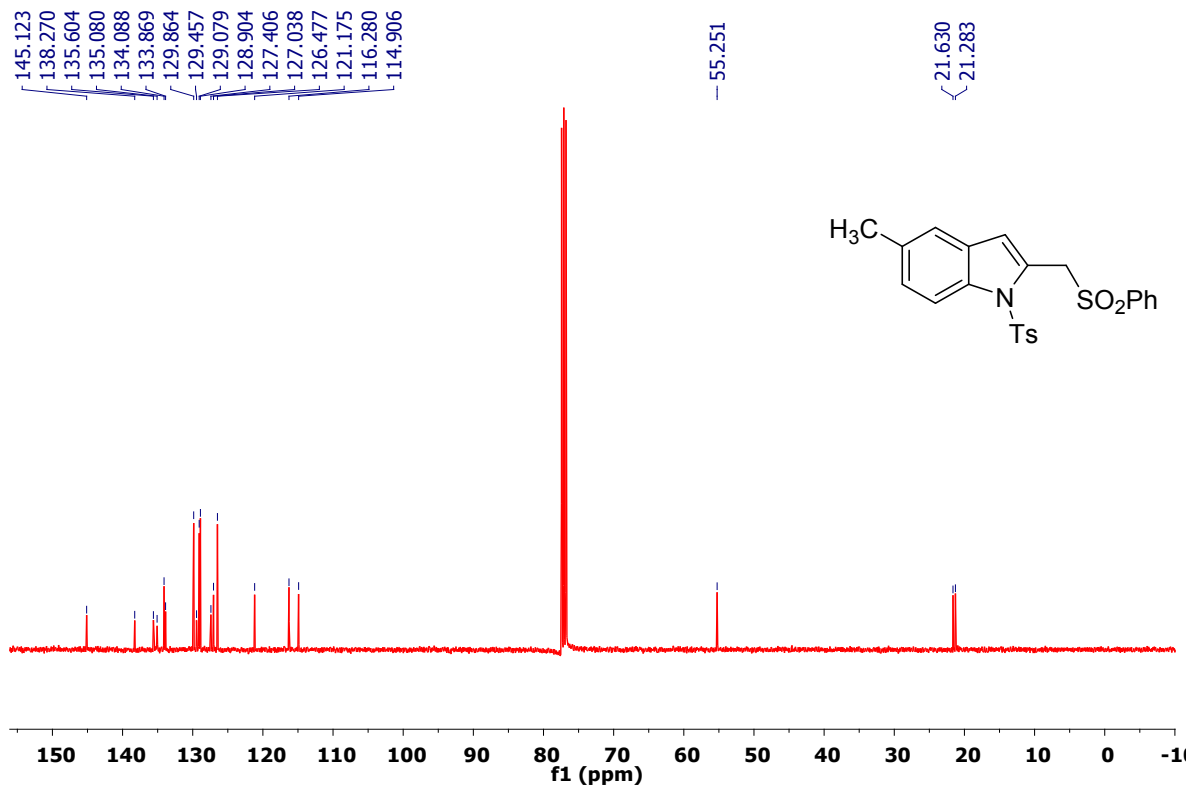

8g, CDCl<sub>3</sub>

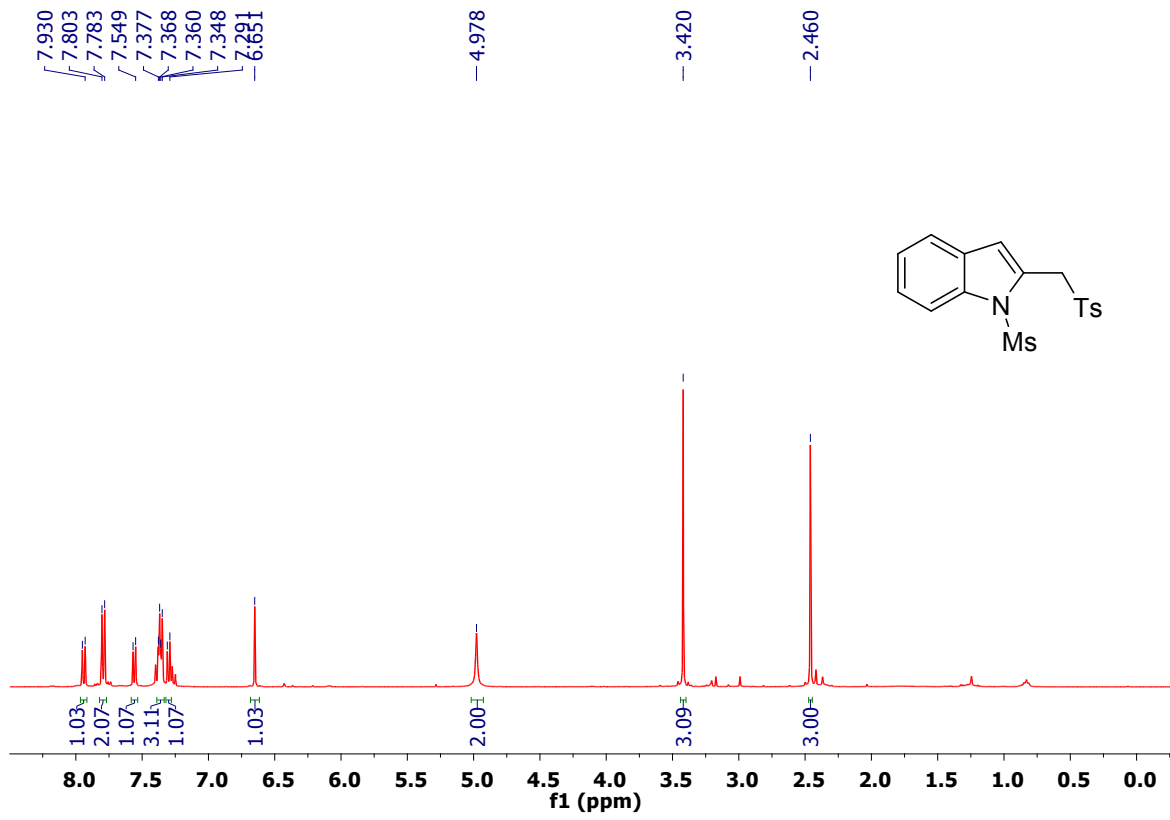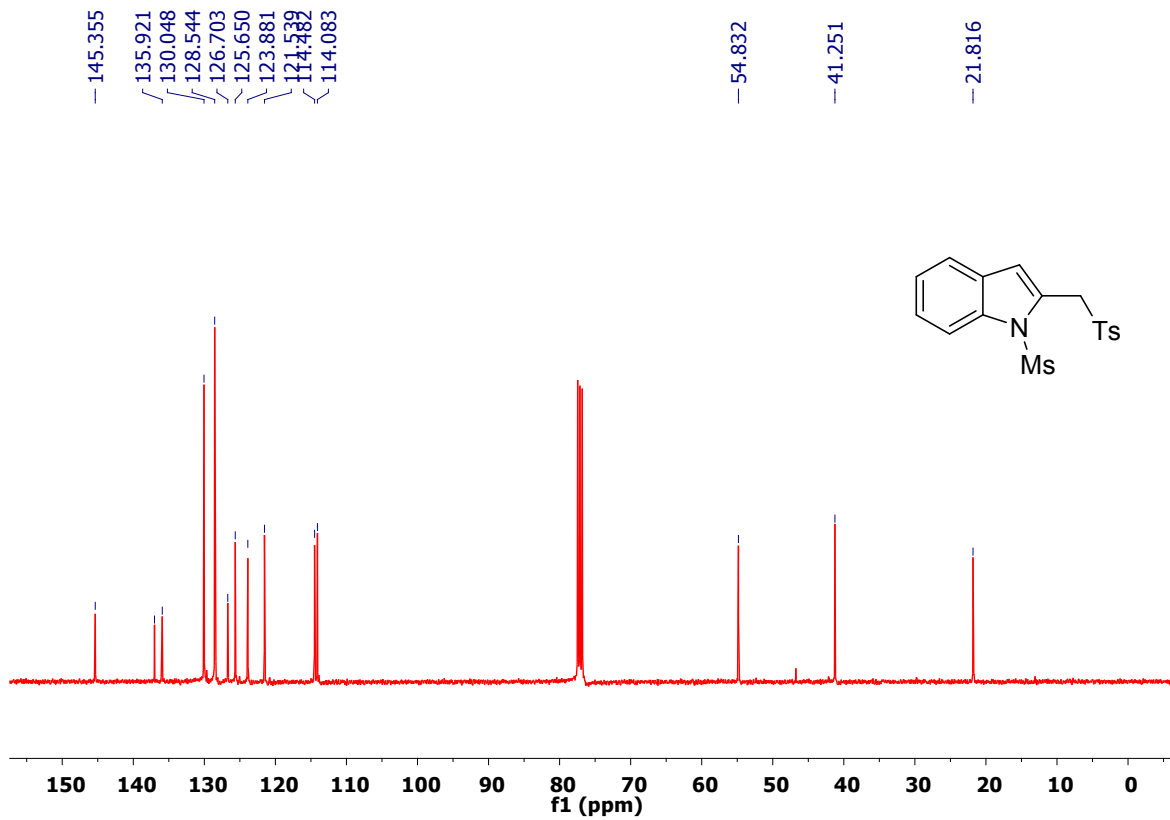

8h, CDCl<sub>3</sub>

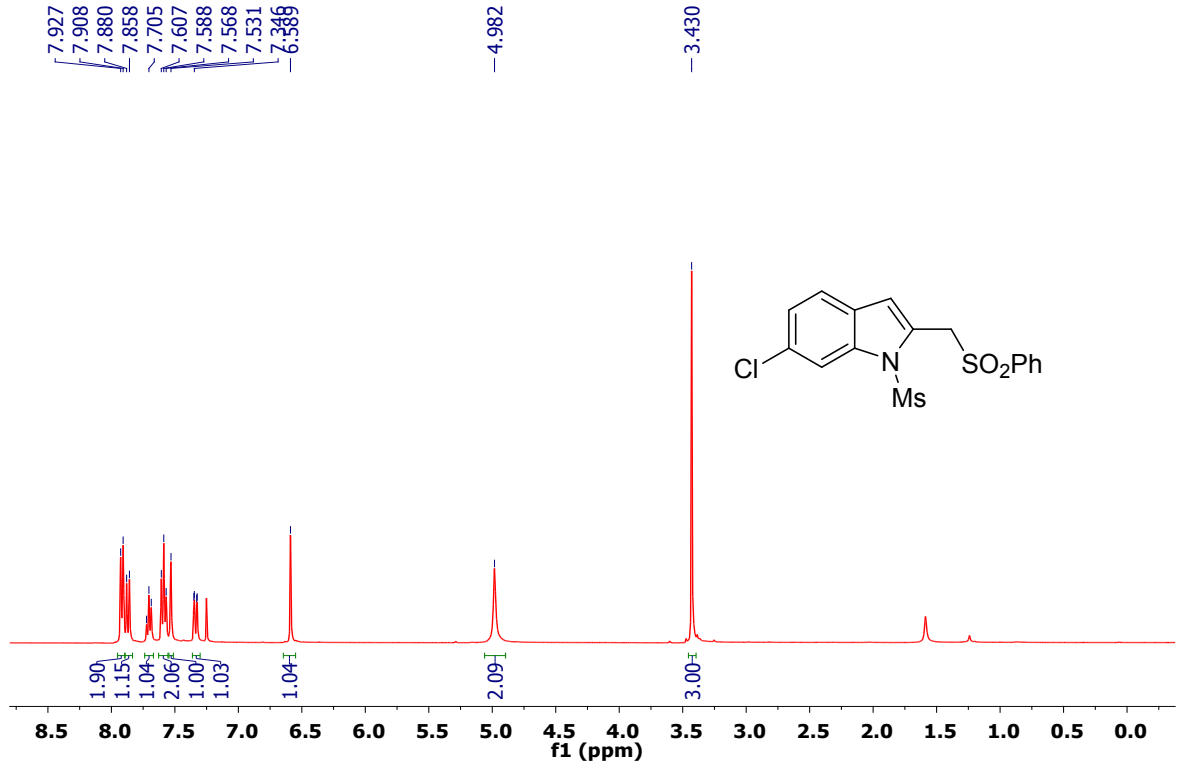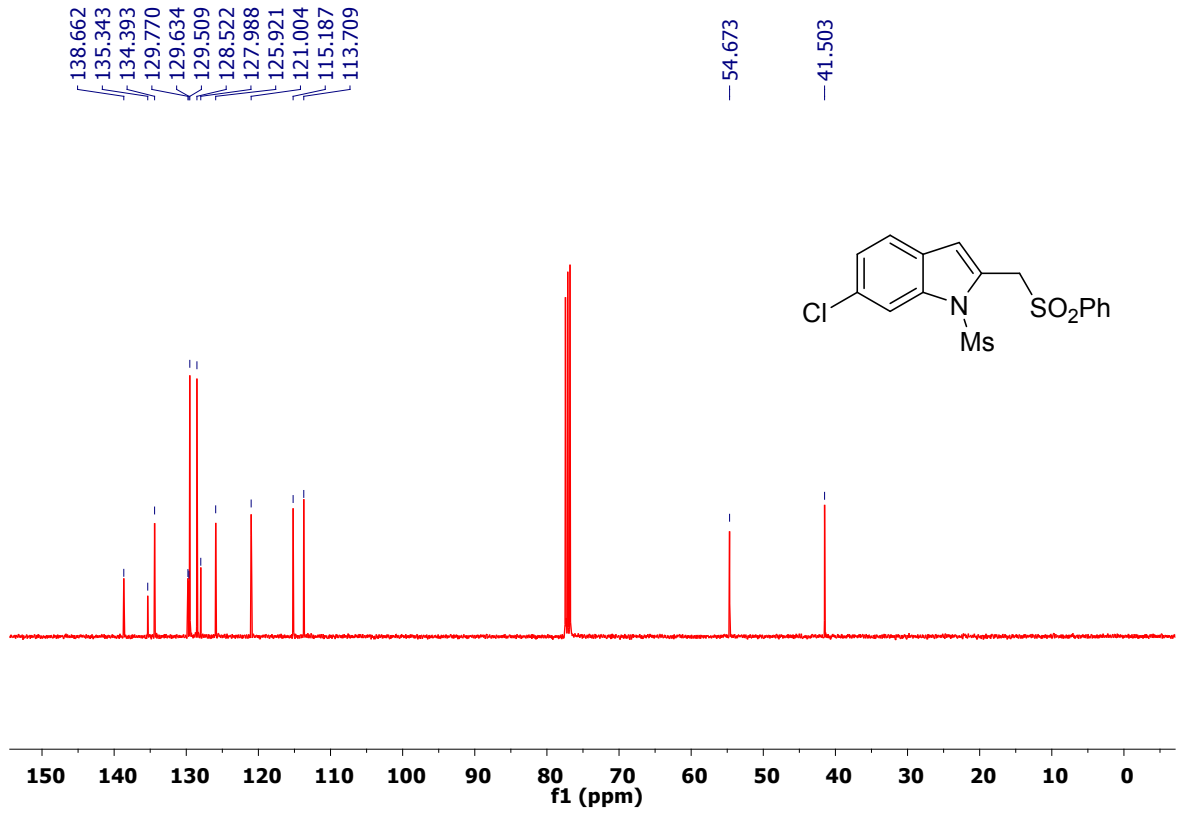

8i, CDCl<sub>3</sub>

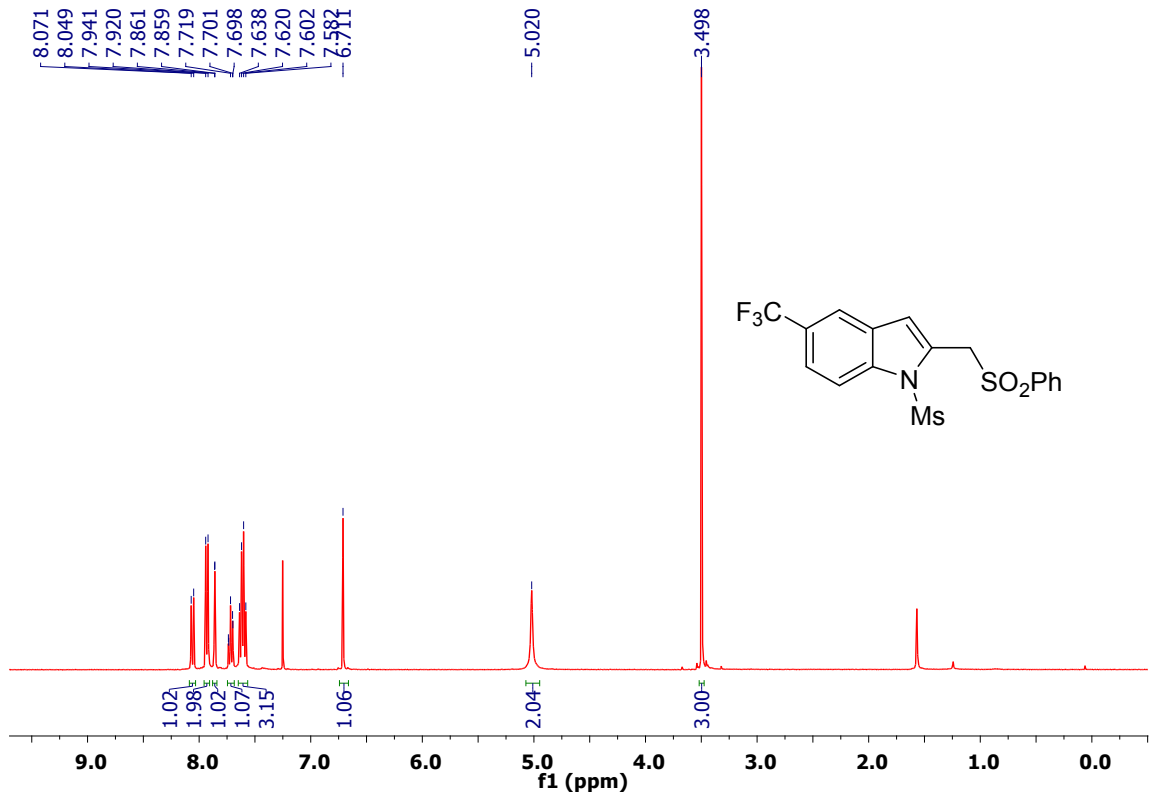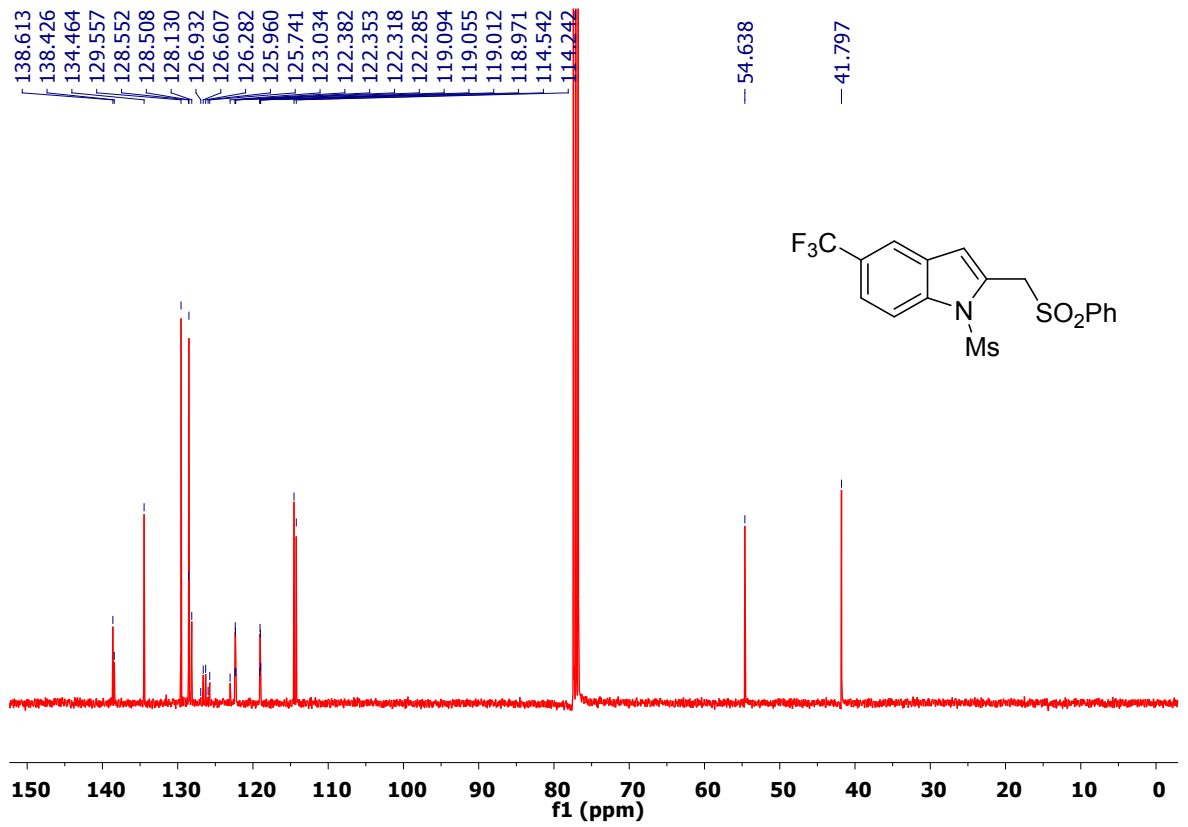

8j, CDCl<sub>3</sub>

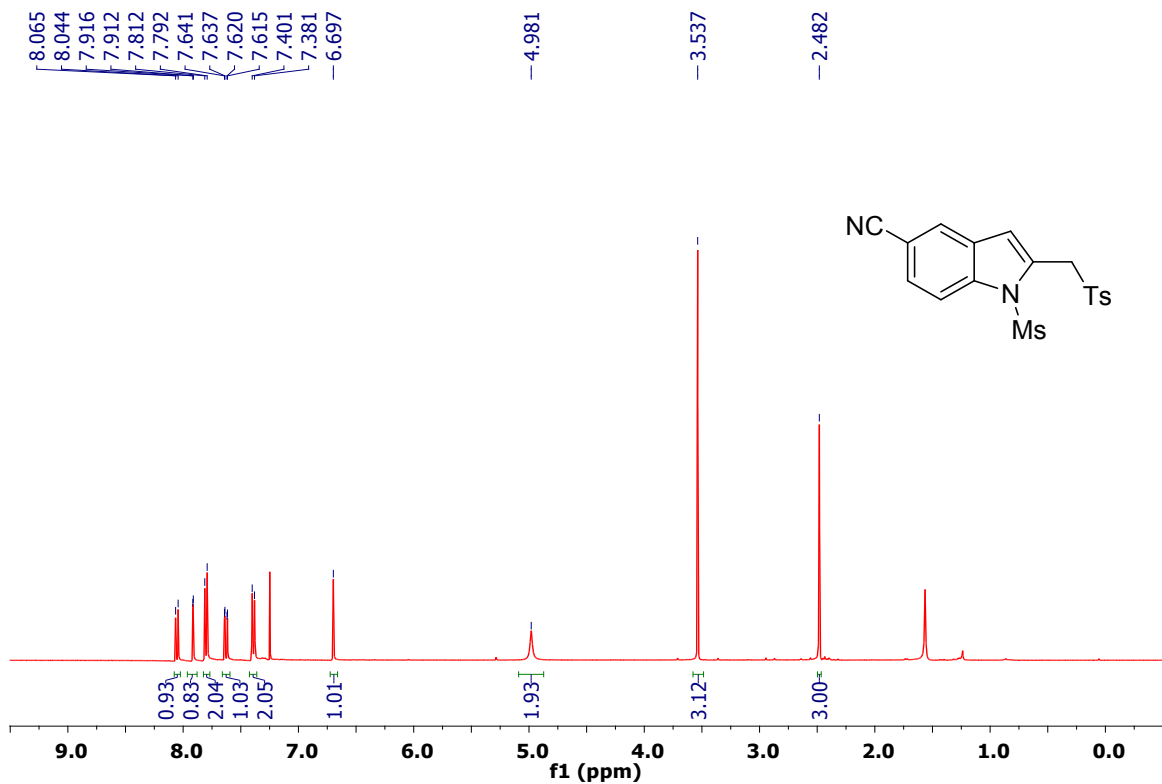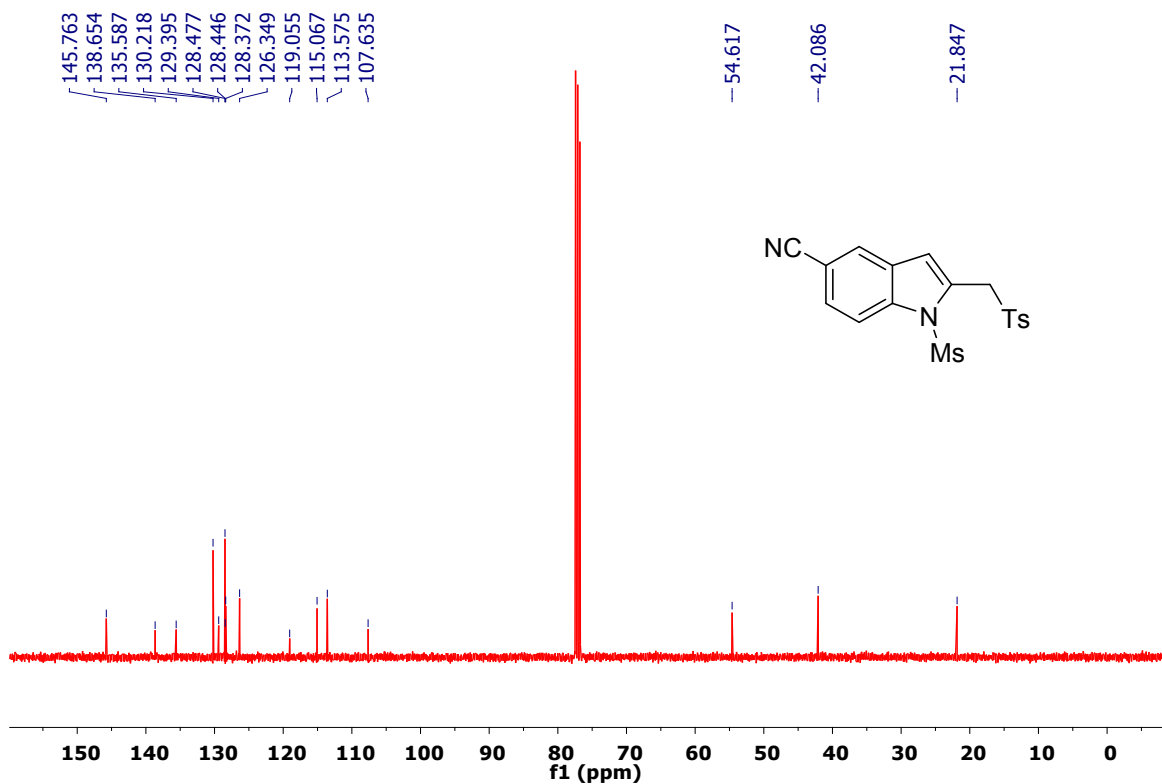

8k, CDCl<sub>3</sub>

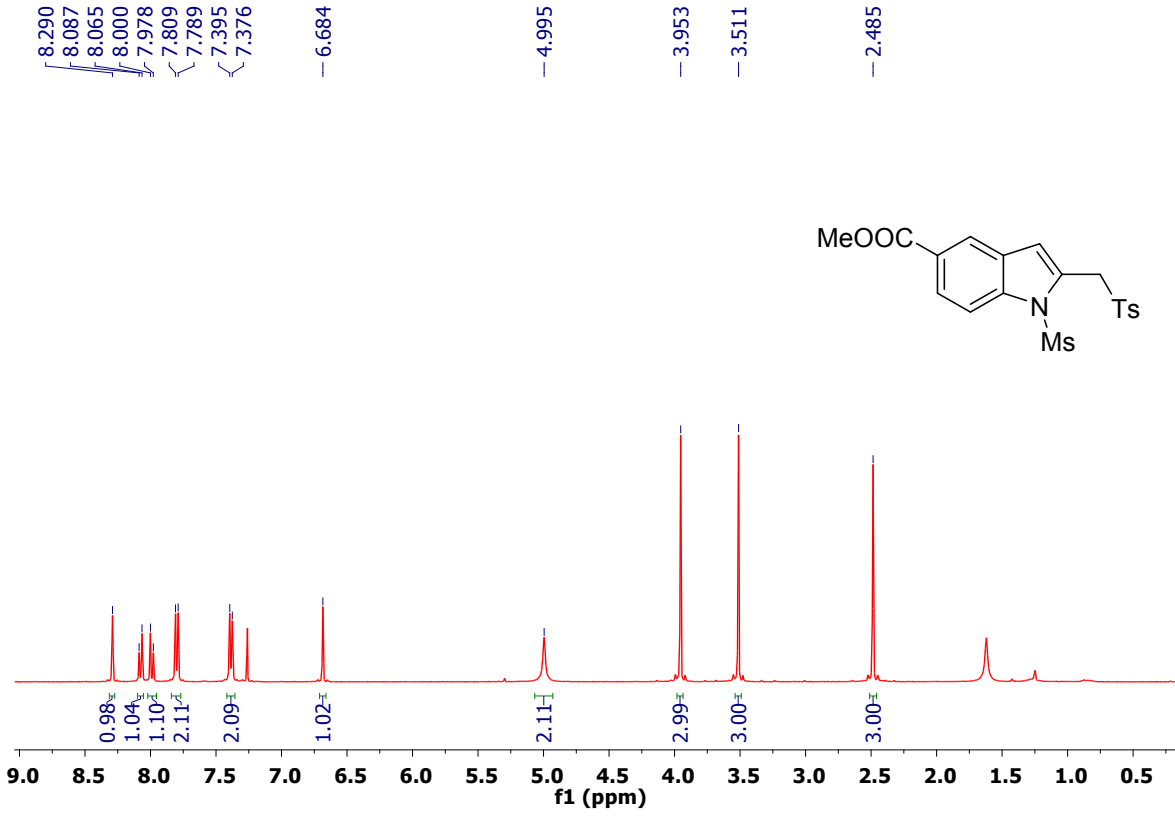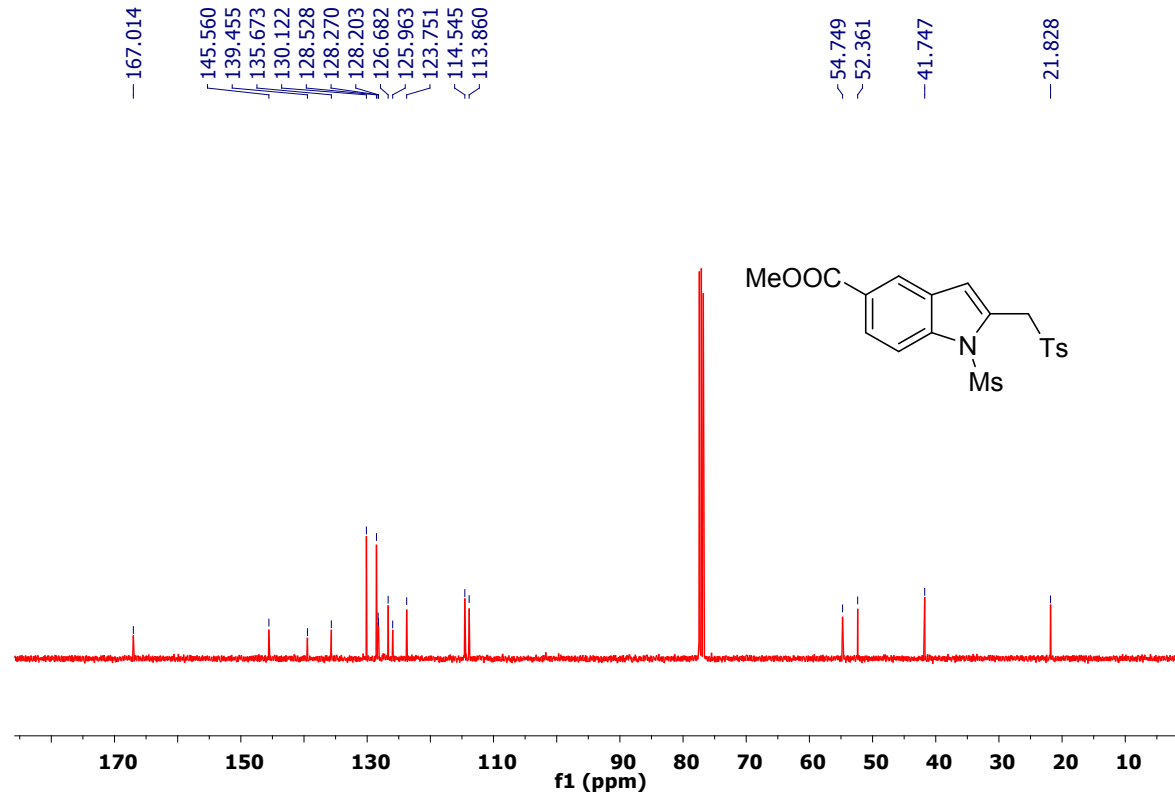

9a, CDCl<sub>3</sub>

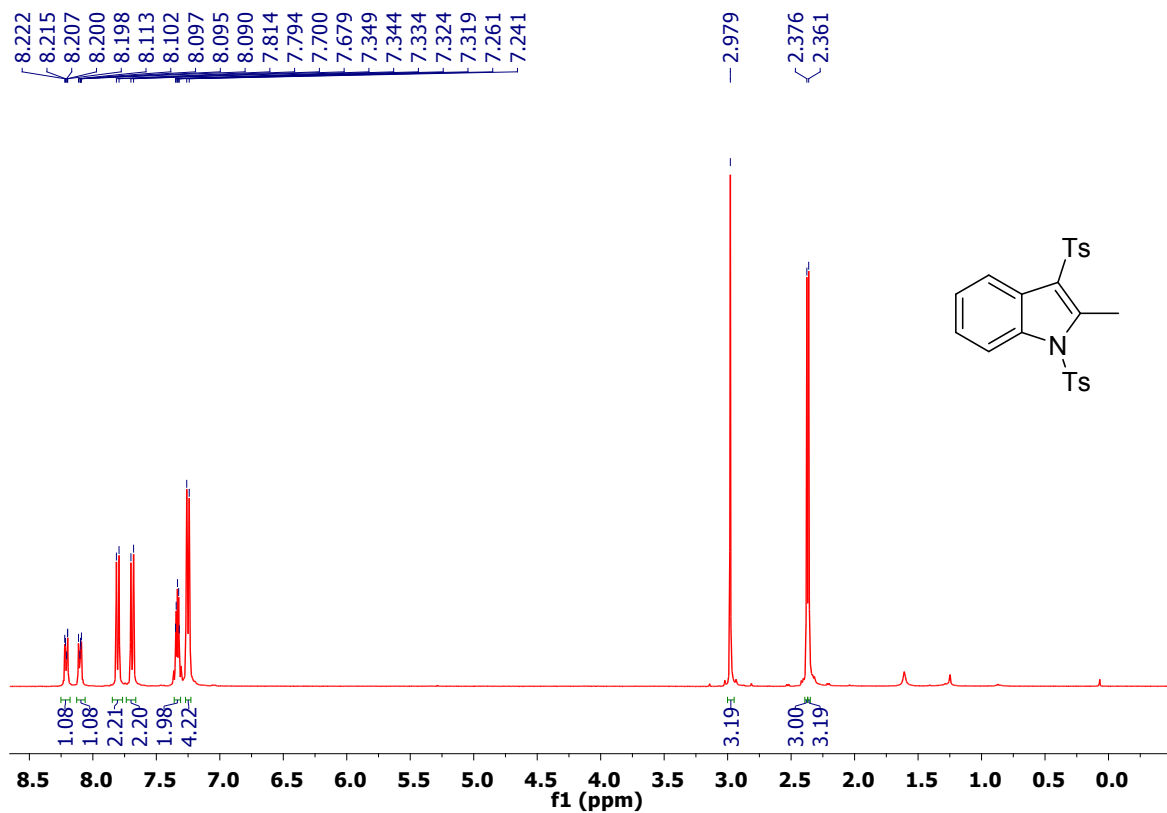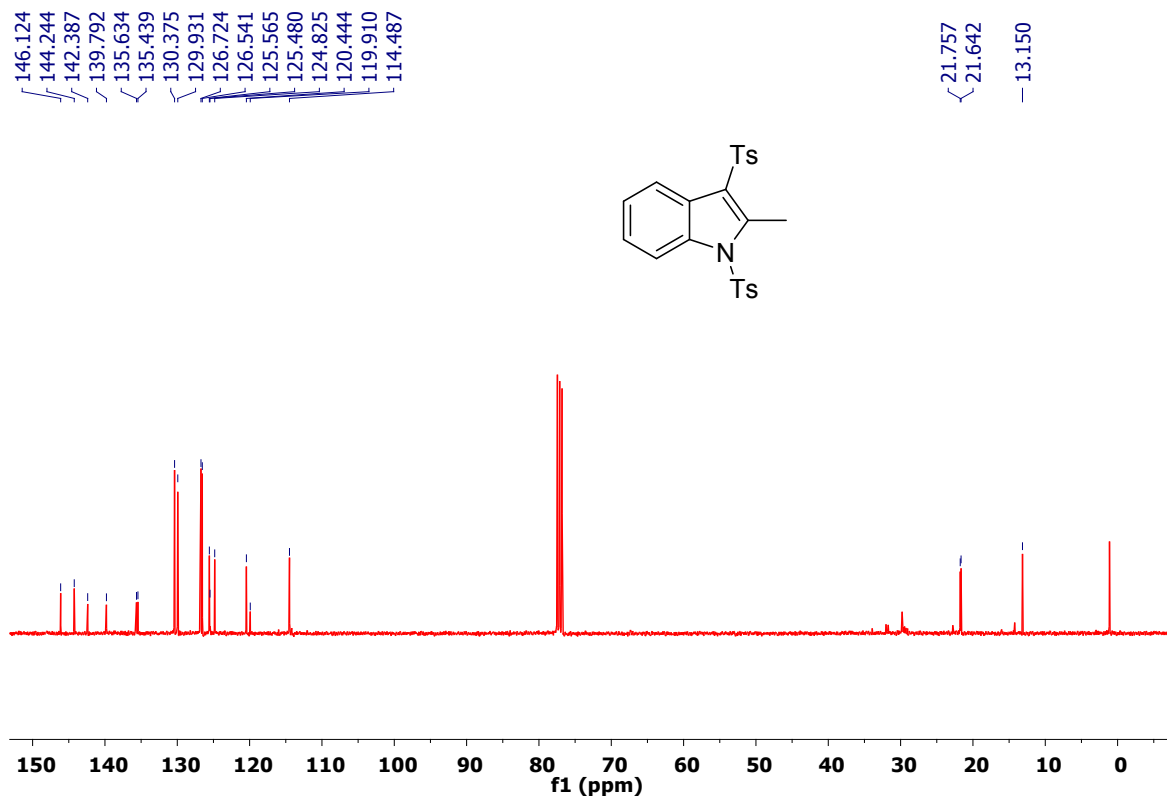

9a, CDCl<sub>3</sub>, DEPT-135

130.373  
129.929  
126.723  
126.540  
125.562  
124.823  
120.444  
114.487

21.763  
21.647  
13.152

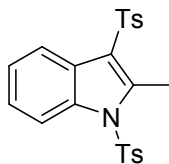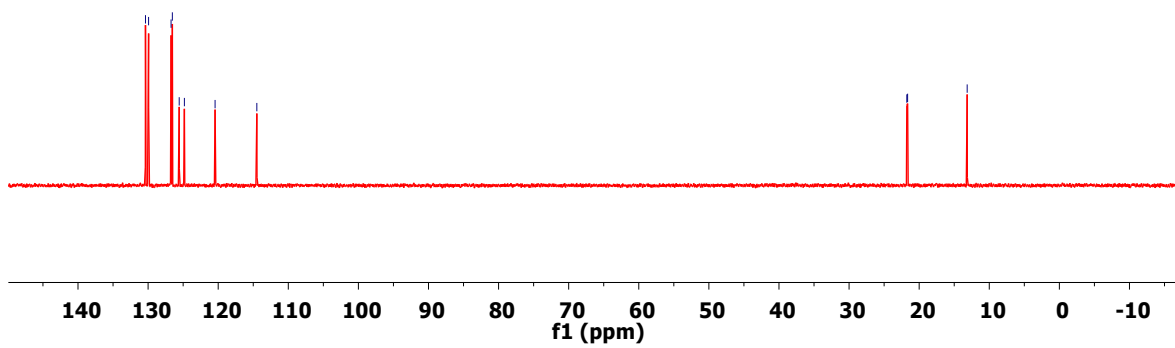



9b, CDCl<sub>3</sub>

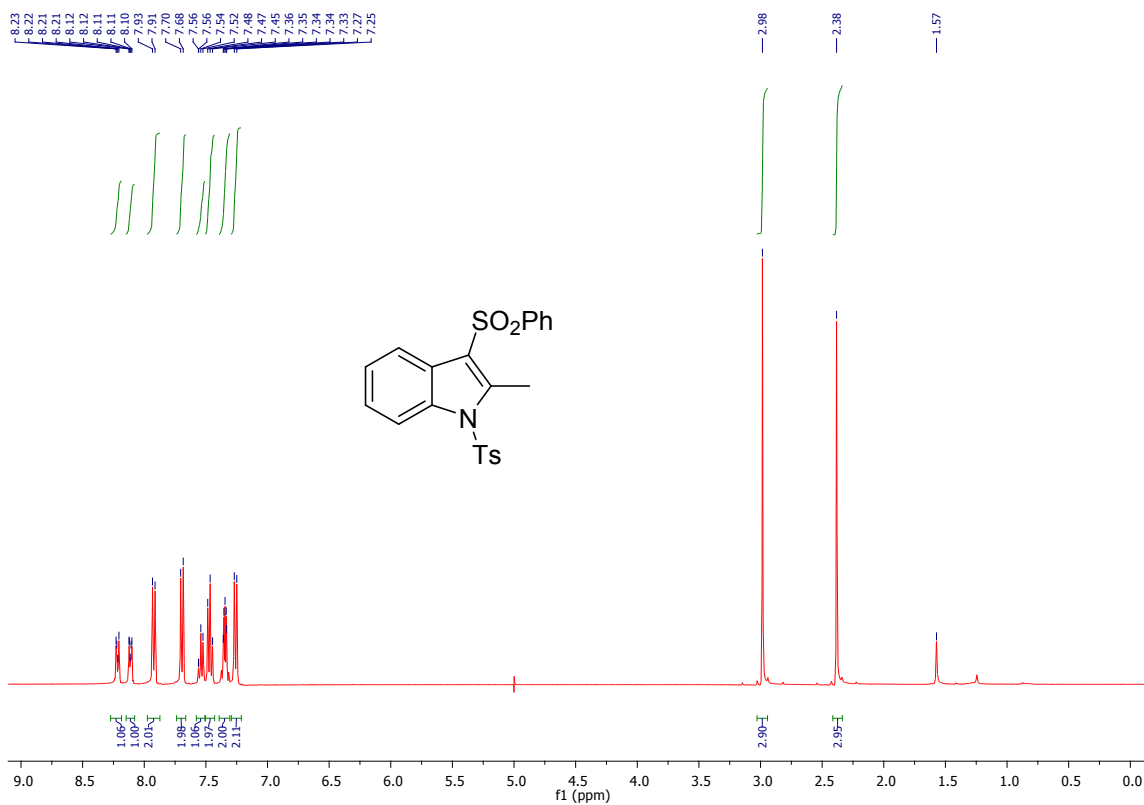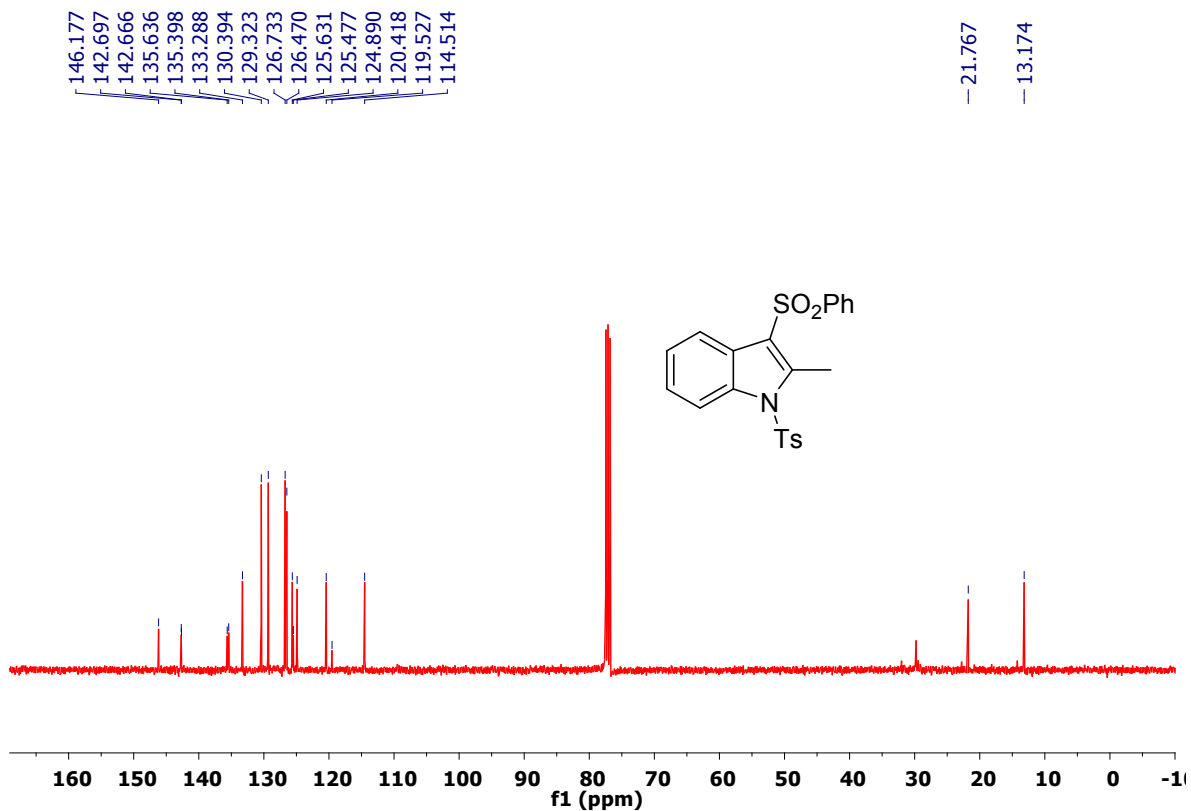

9c, CDCl<sub>3</sub>

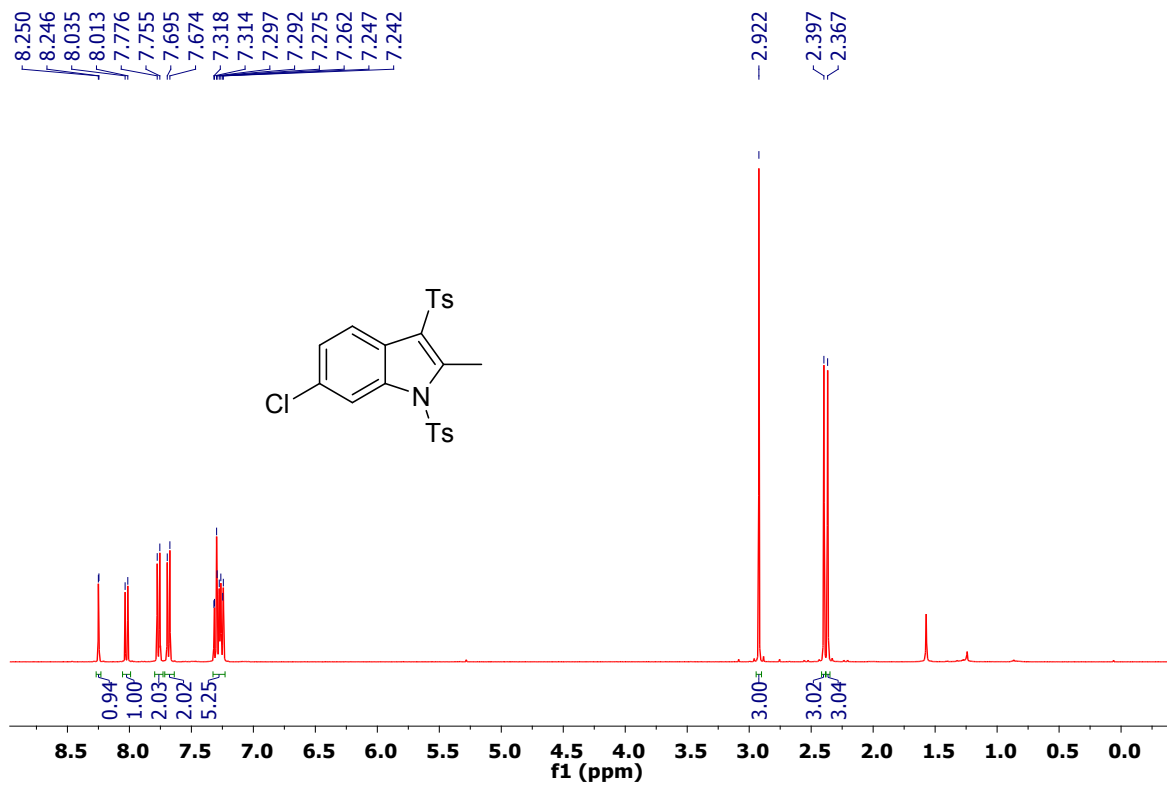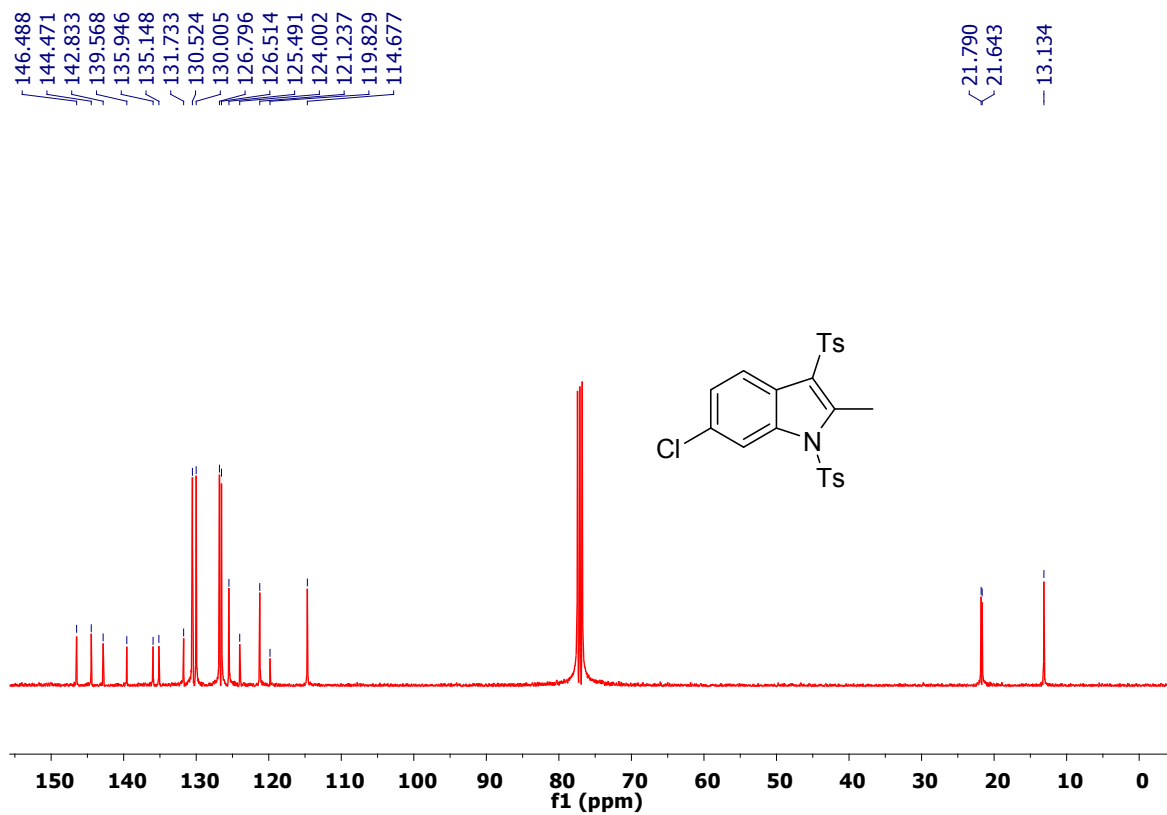

9d, CDCl<sub>3</sub>

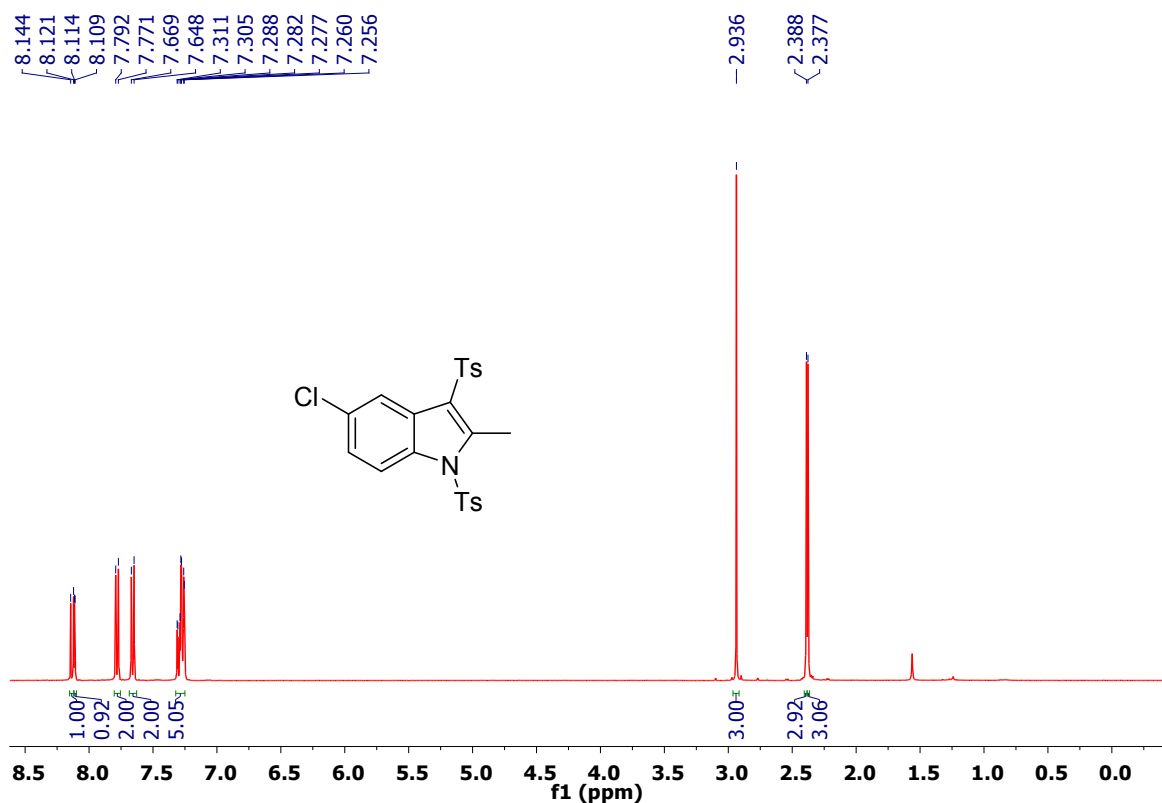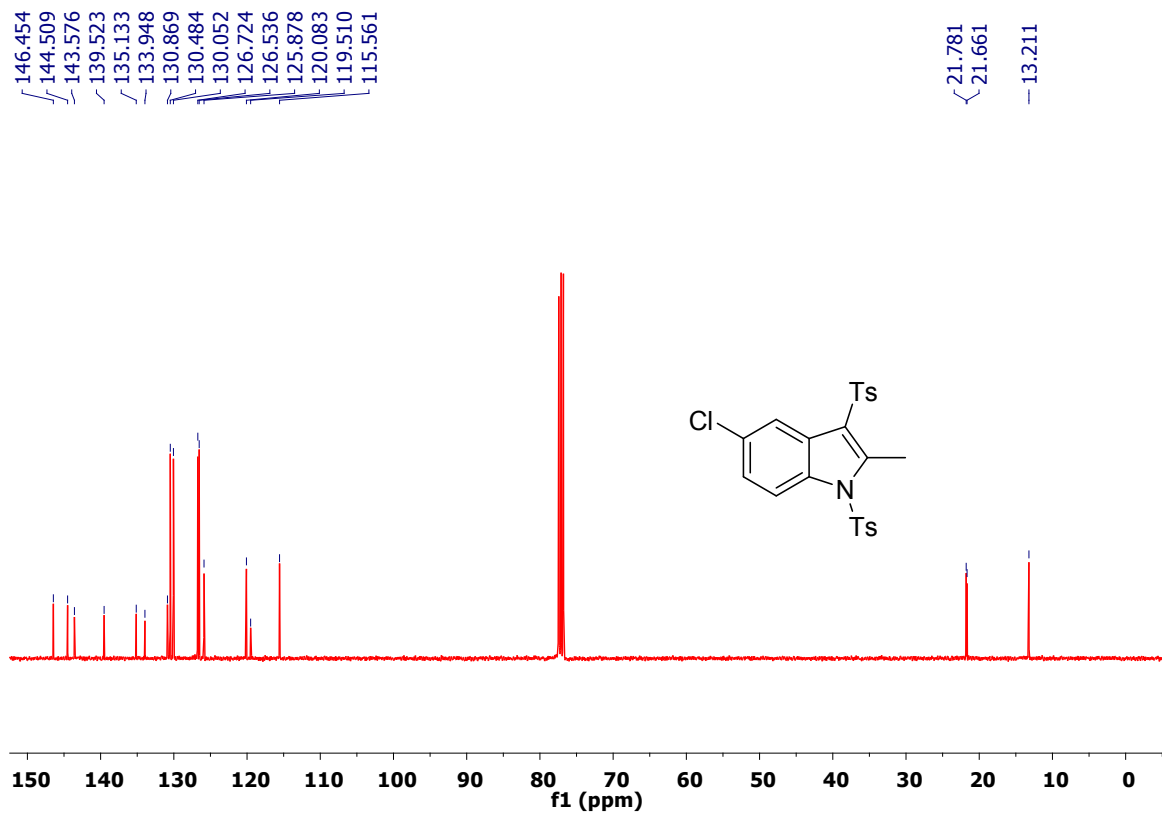

9f, CDCl<sub>3</sub>

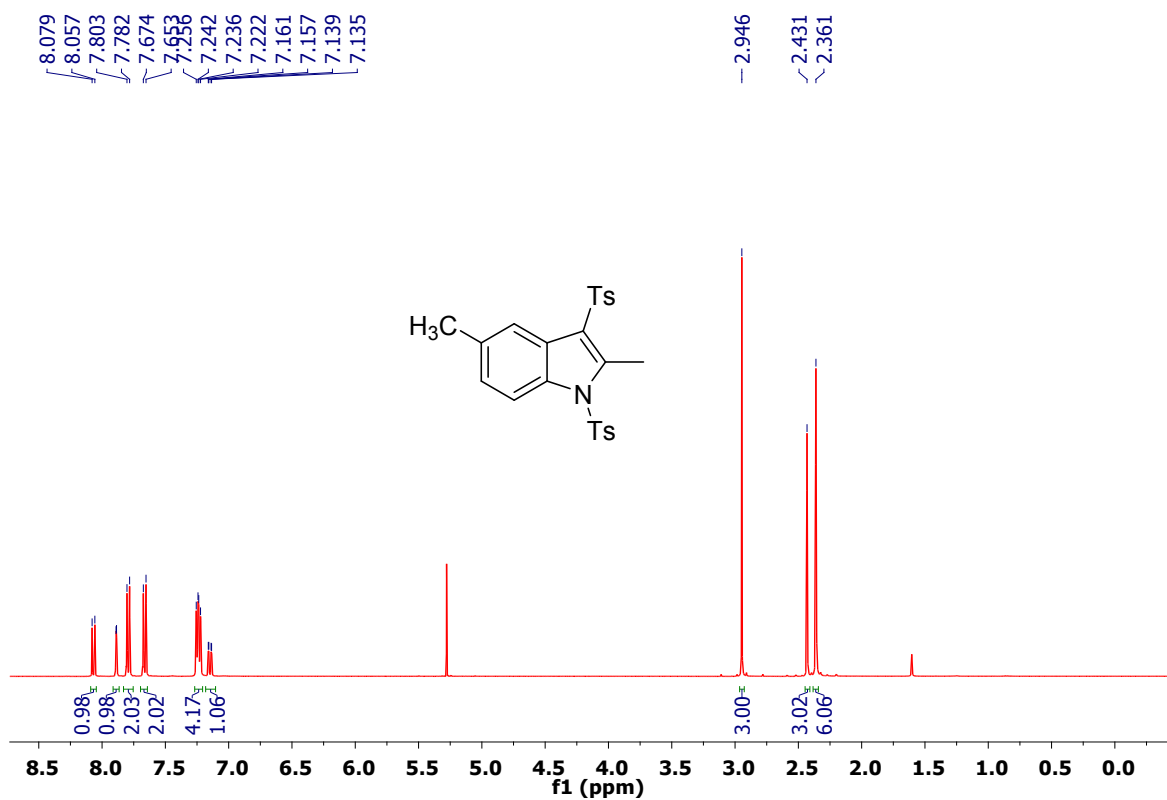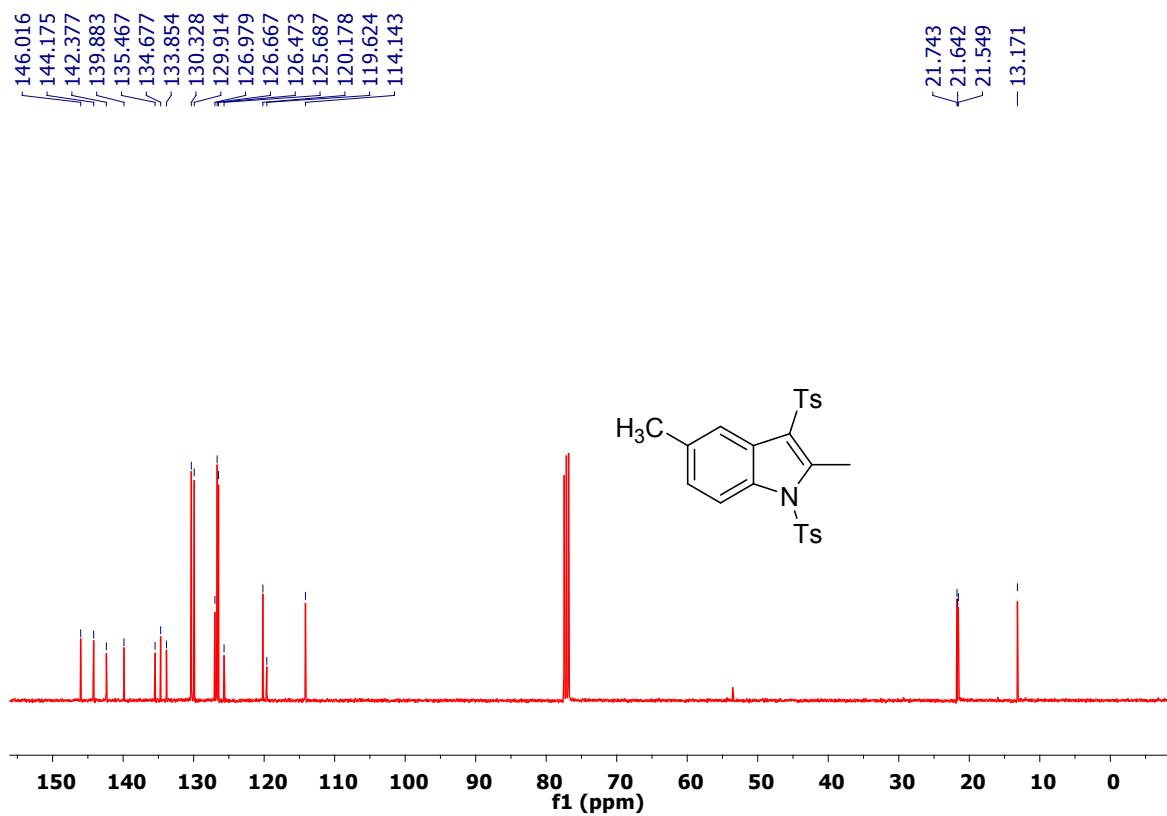

9g, CDCl<sub>3</sub>

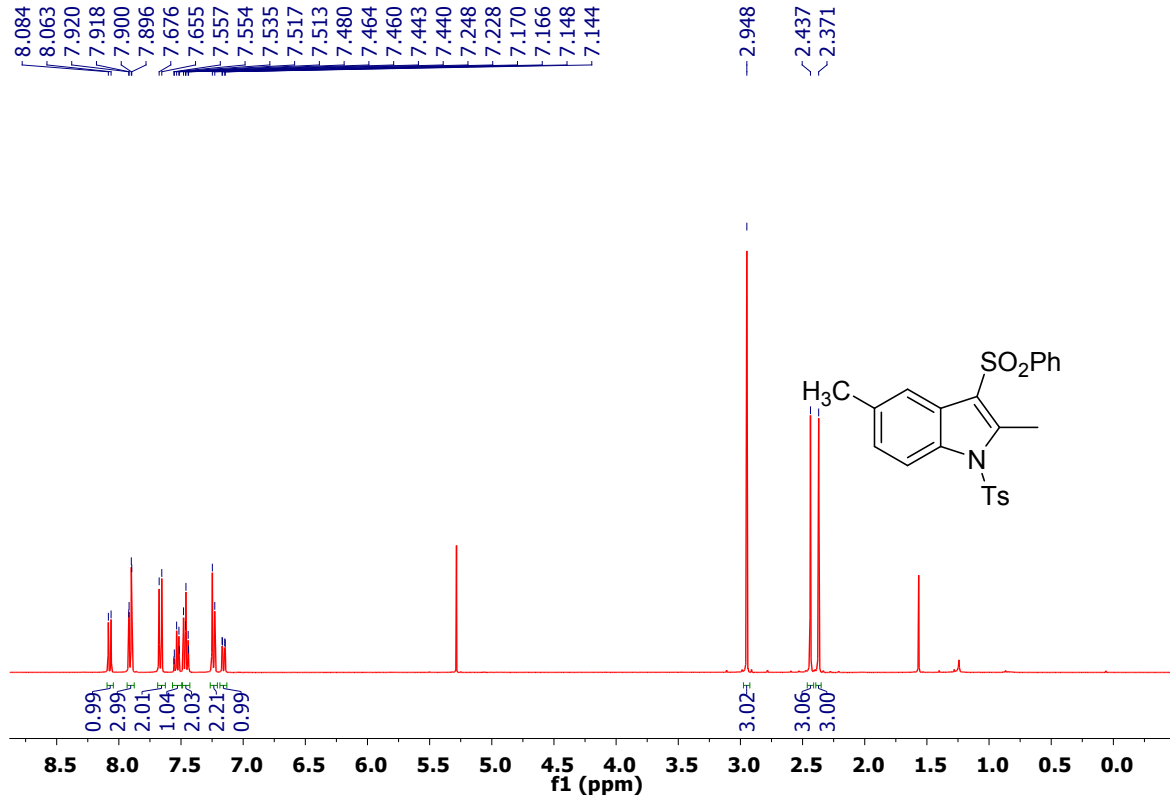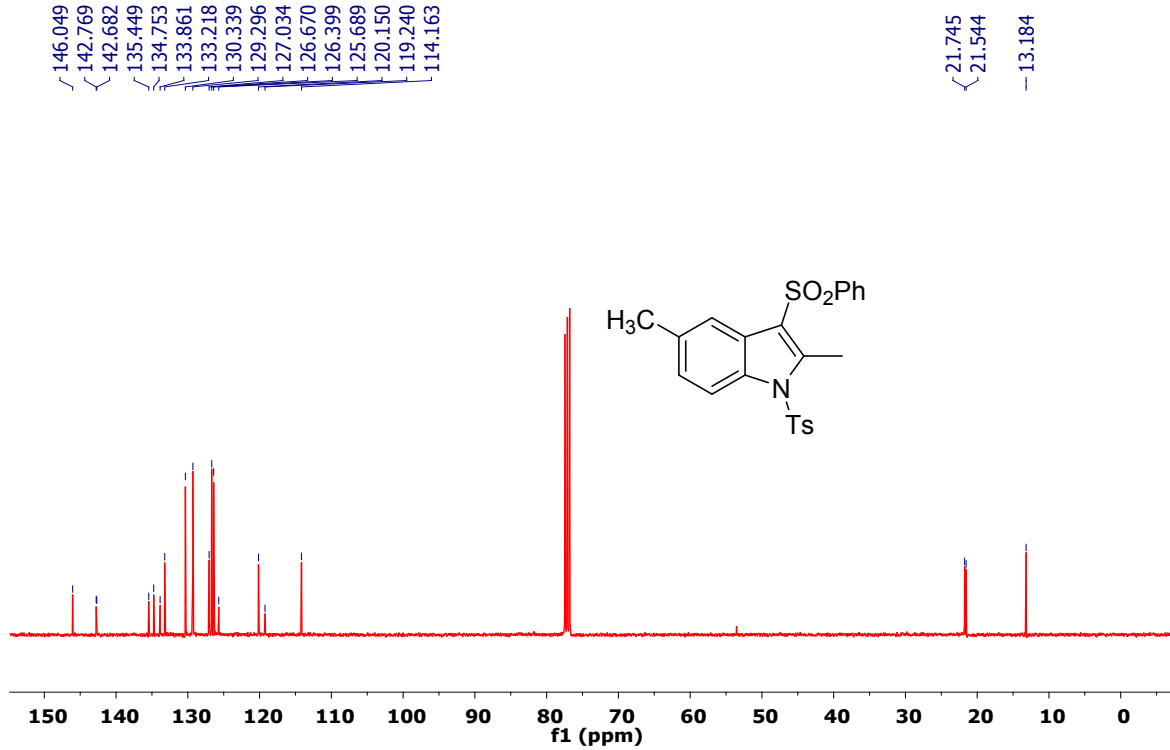

9h, CDCl<sub>3</sub>

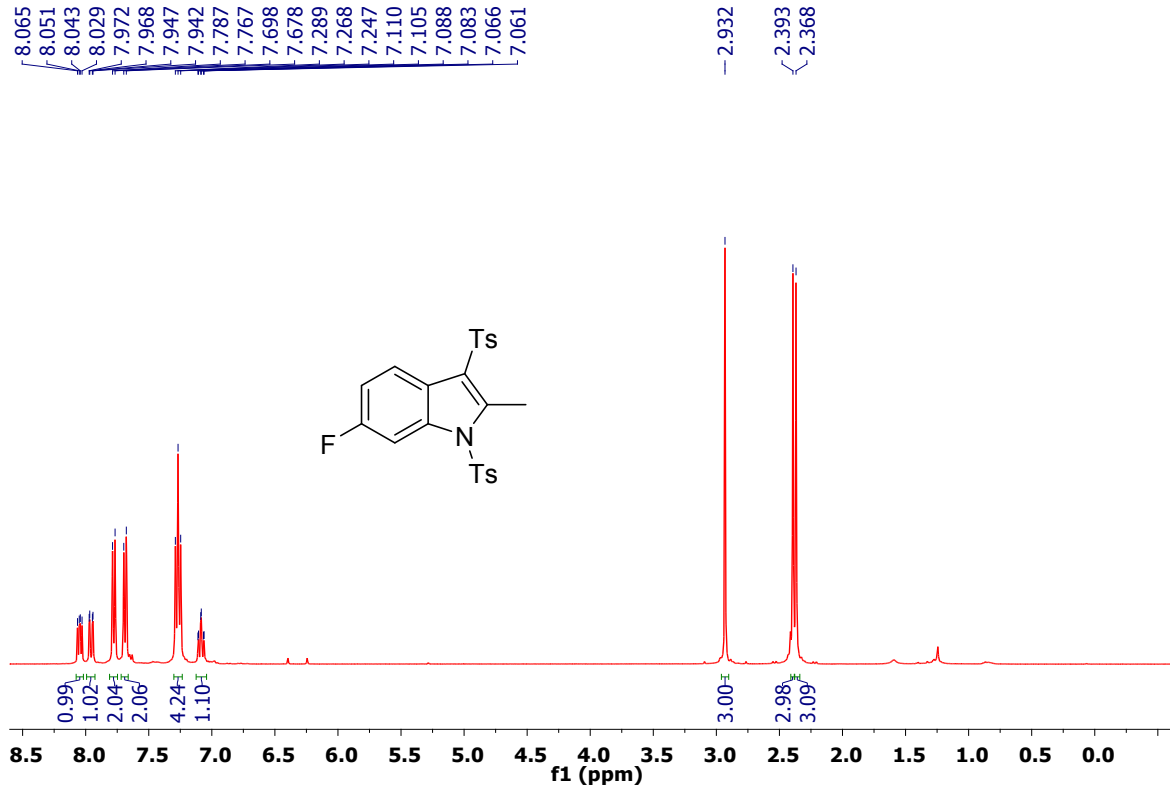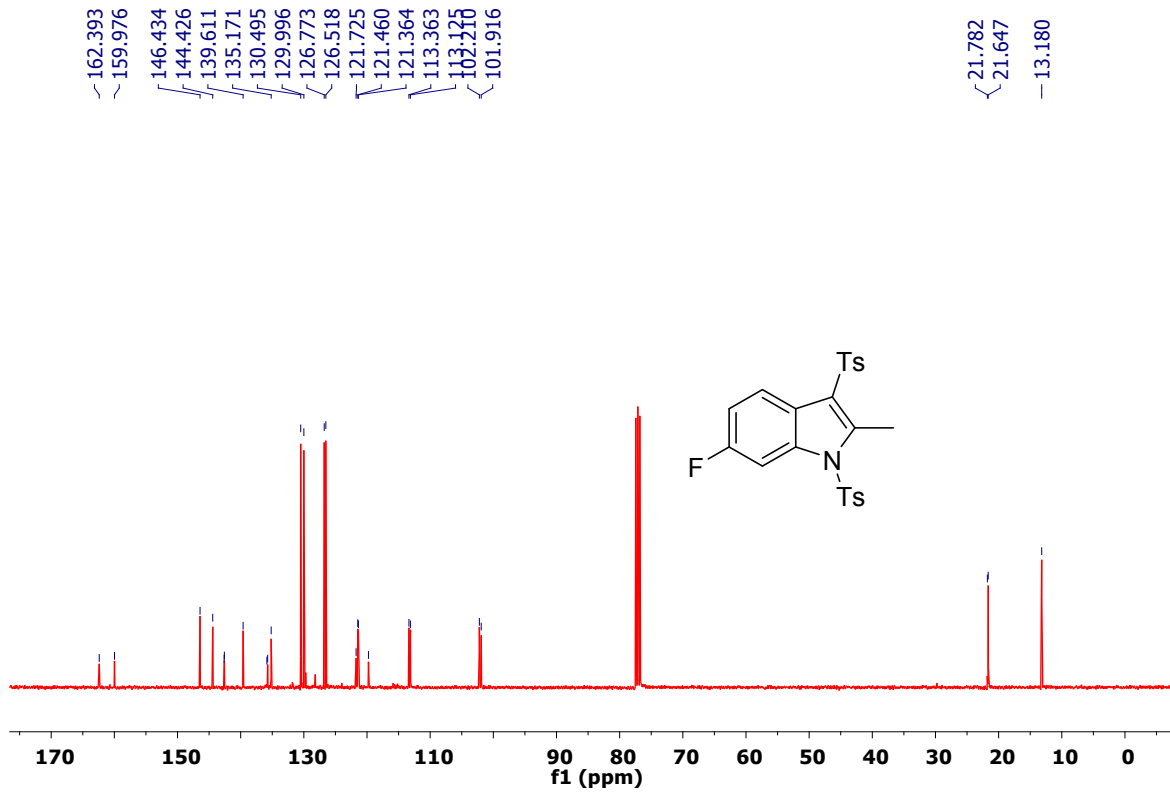

11a, CDCl<sub>3</sub>

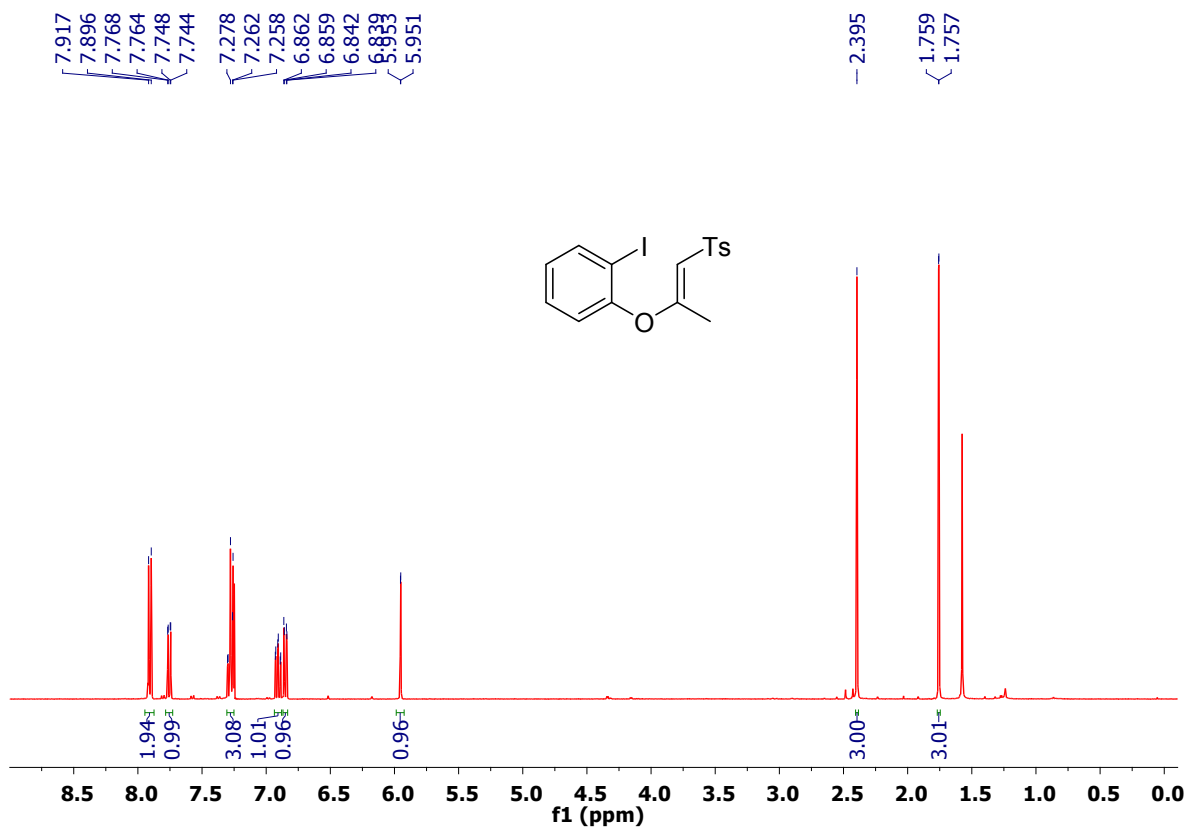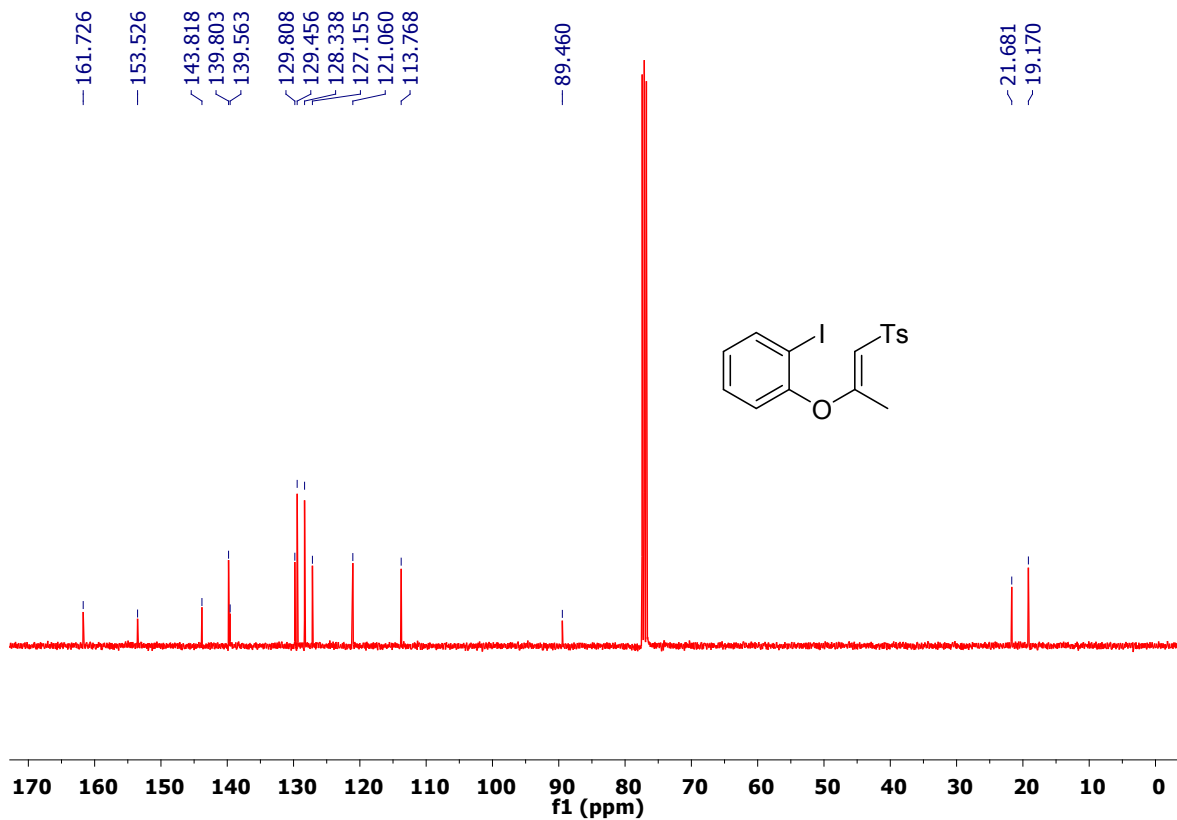

11b, CDCl<sub>3</sub>

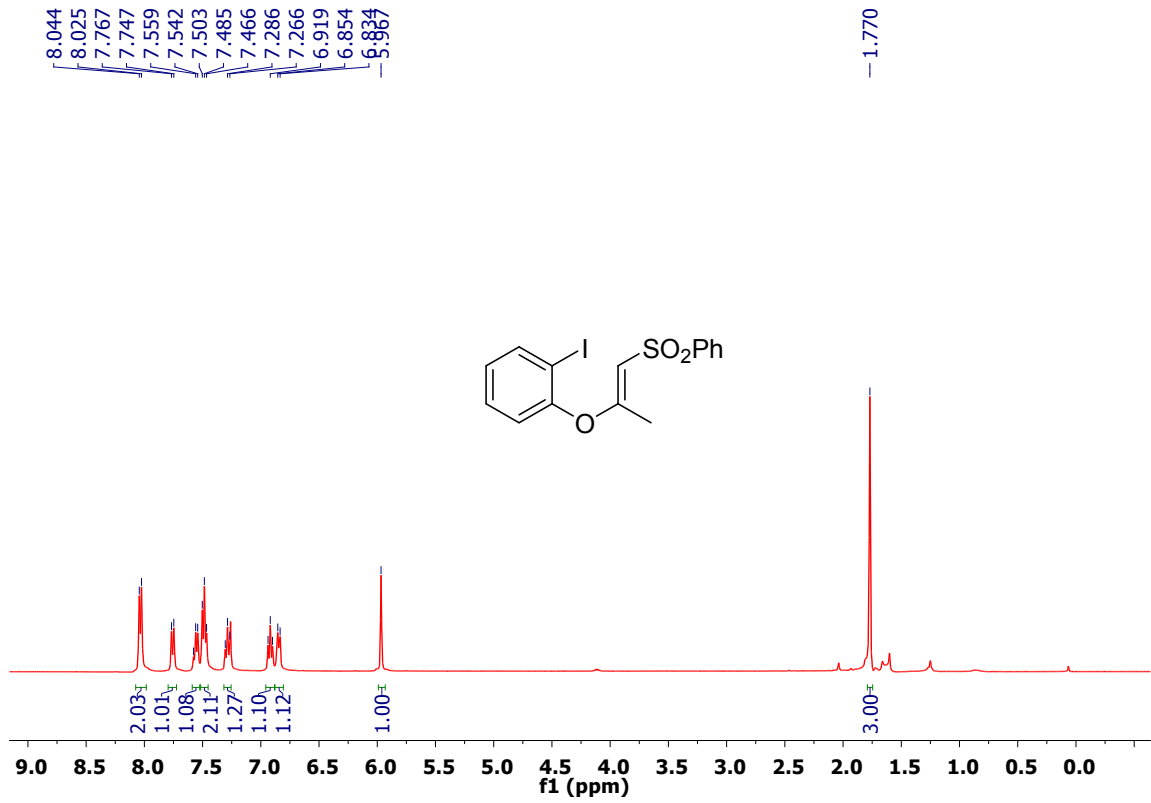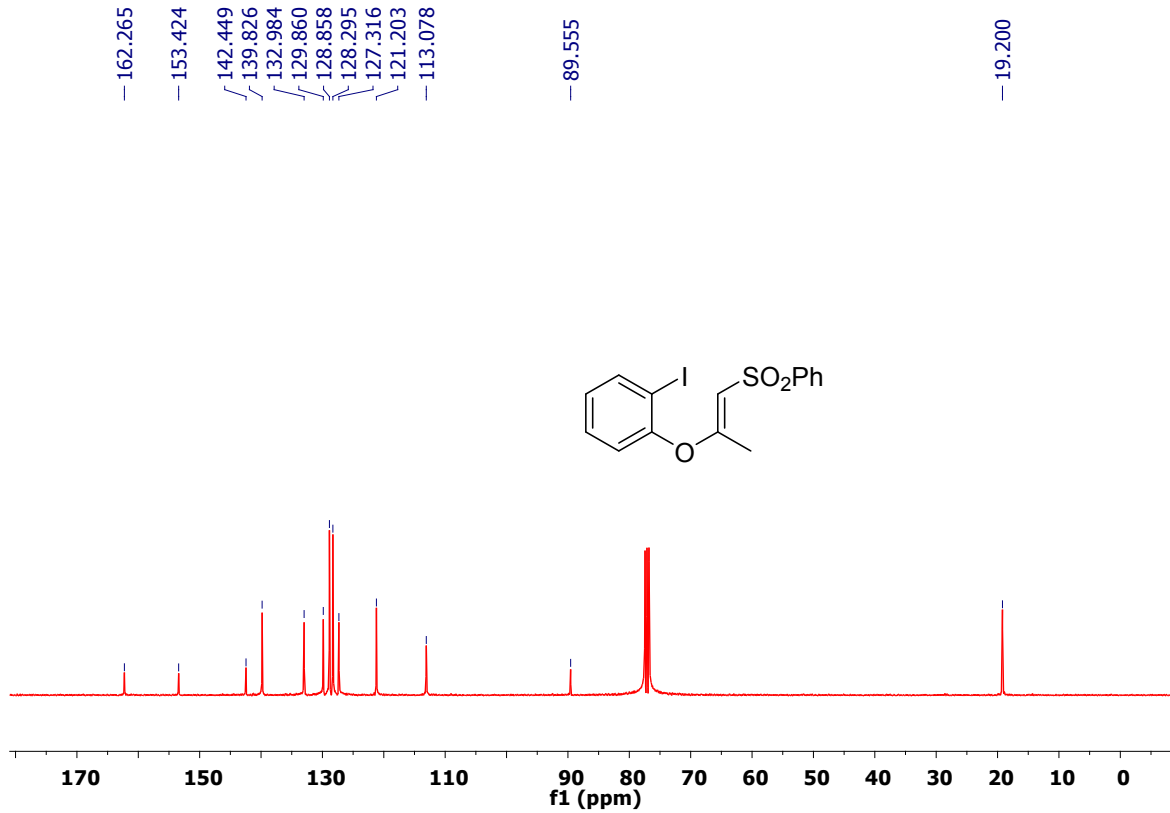



12a, CDCl<sub>3</sub>

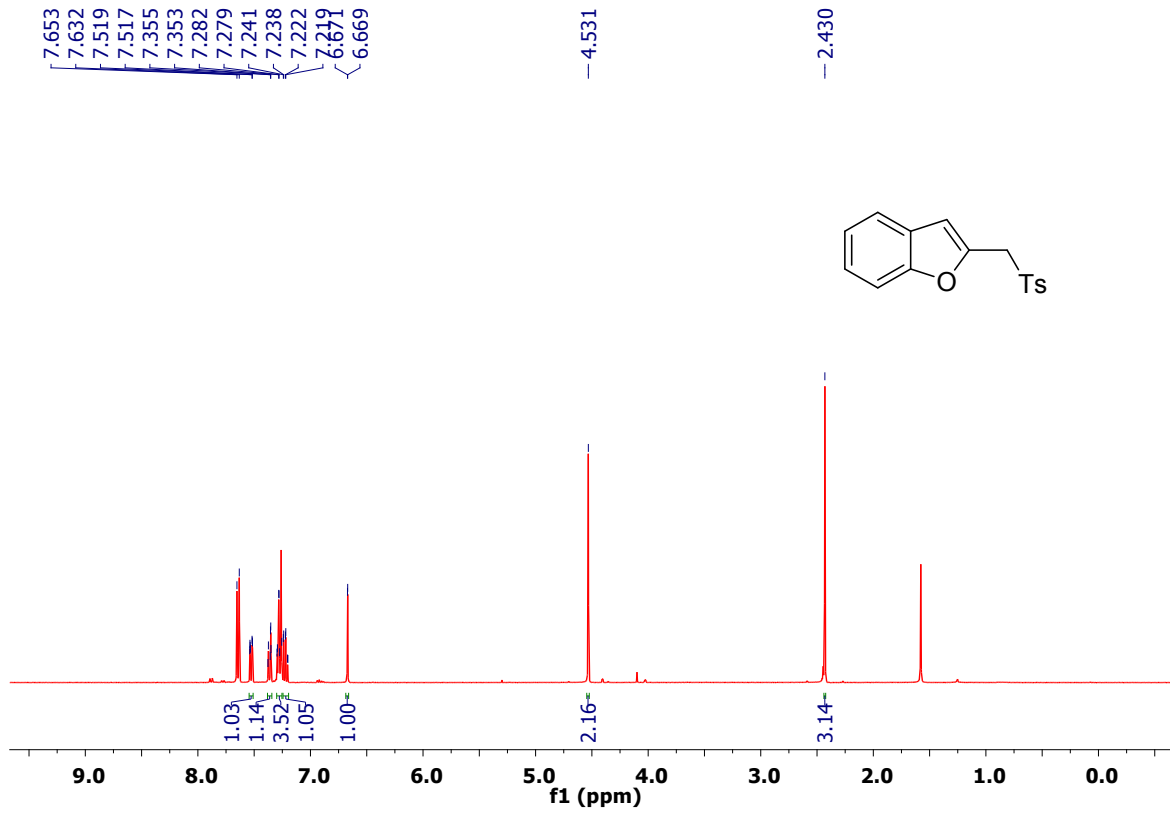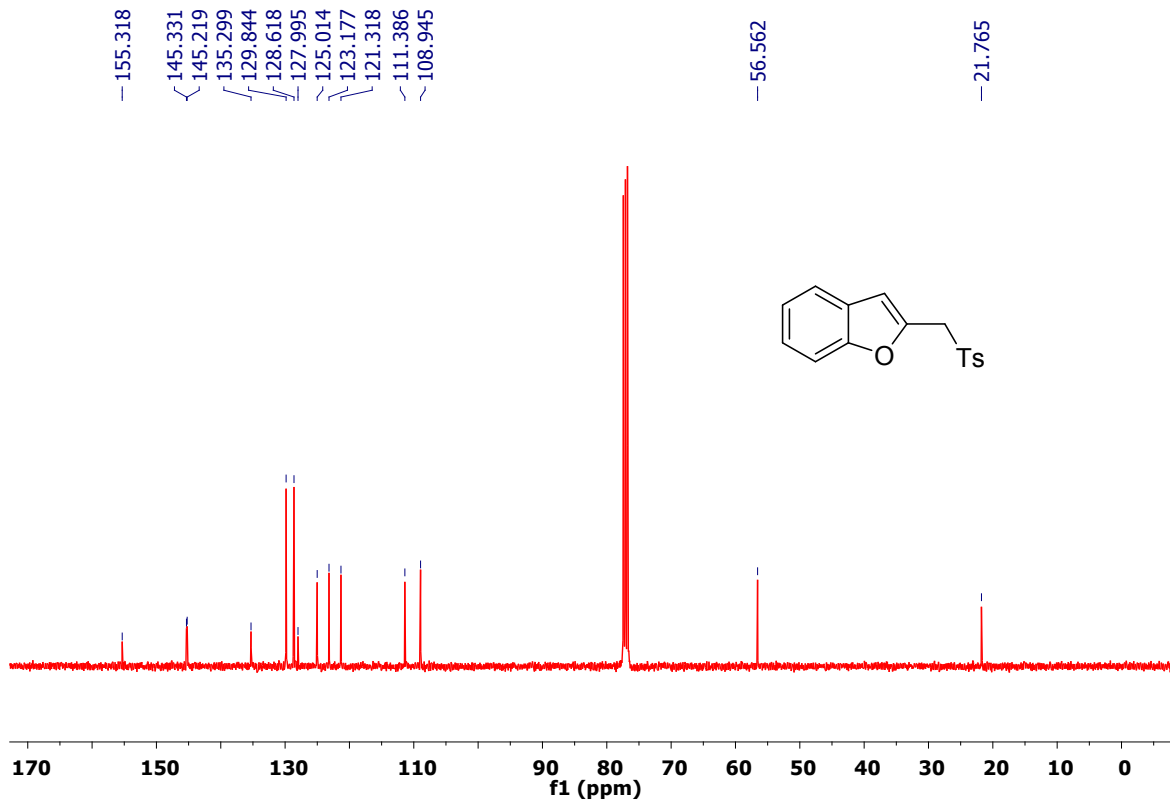

12b, CDCl<sub>3</sub>

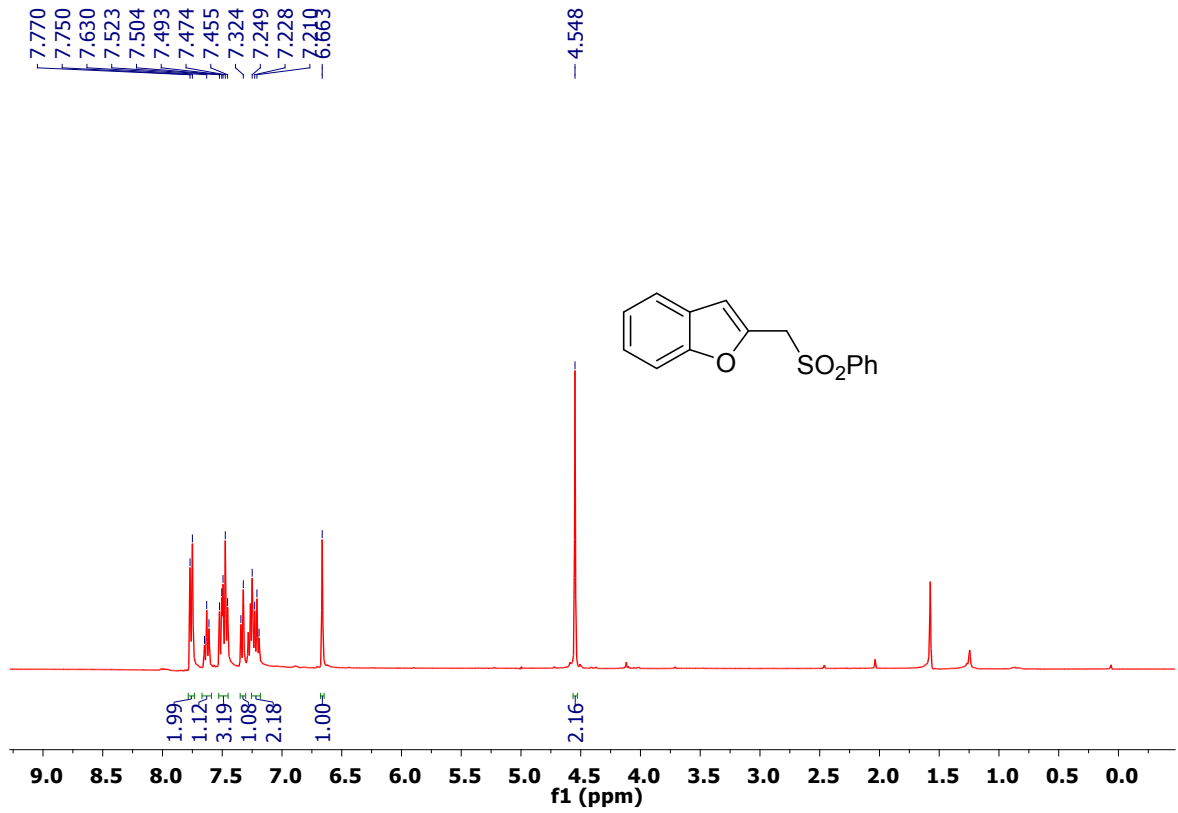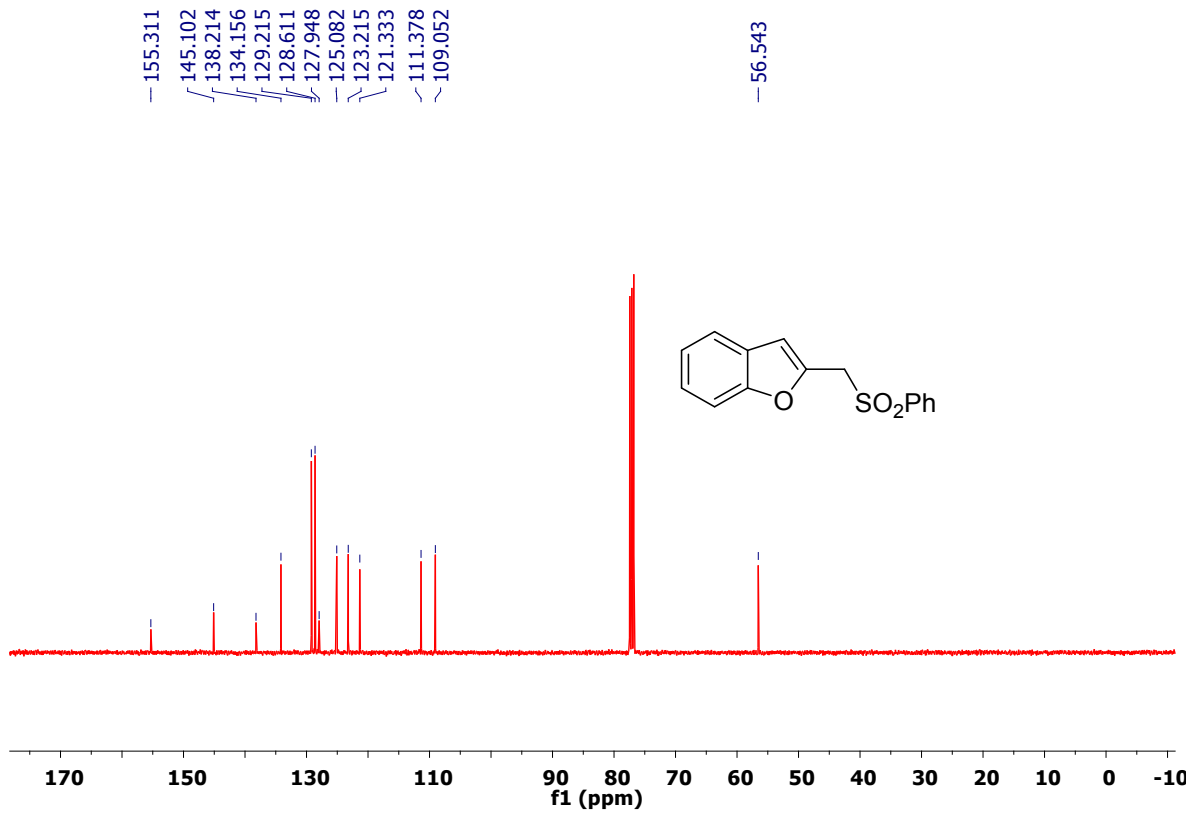

13a, CDCl<sub>3</sub>

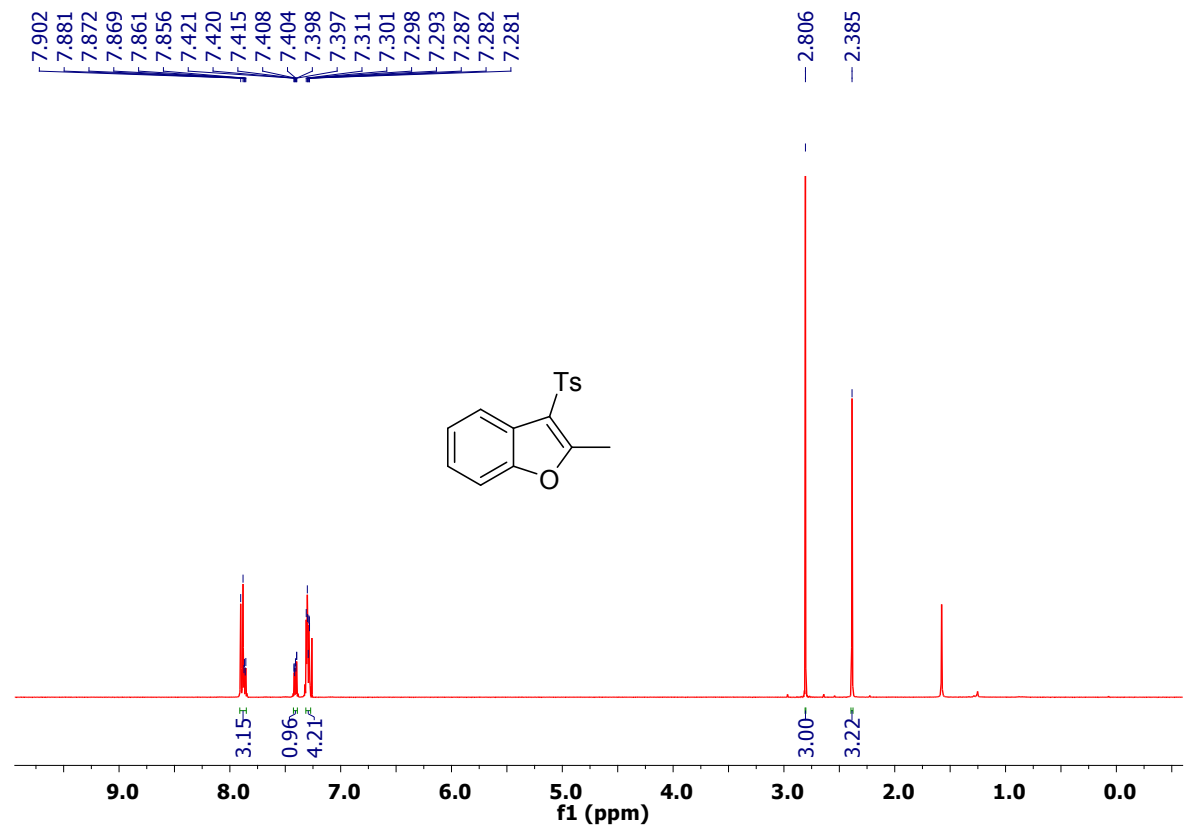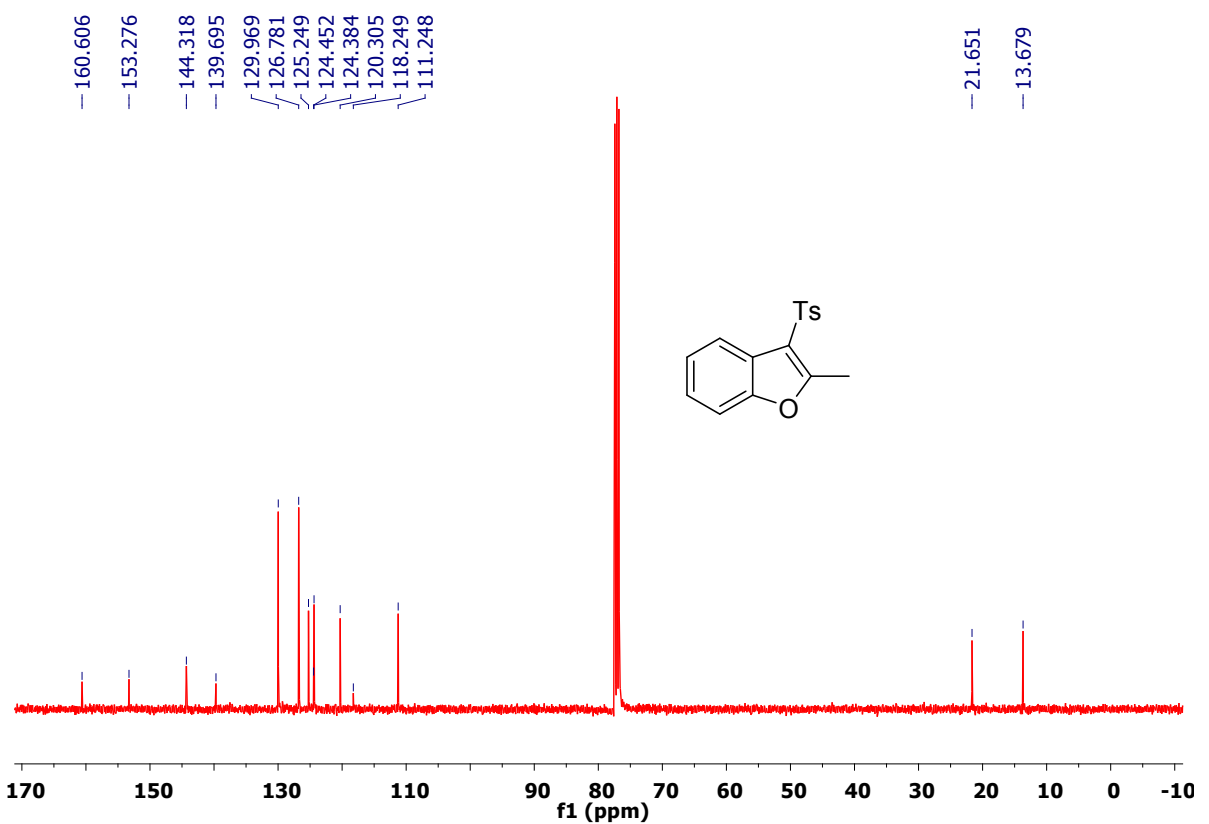

13b, CDCl<sub>3</sub>

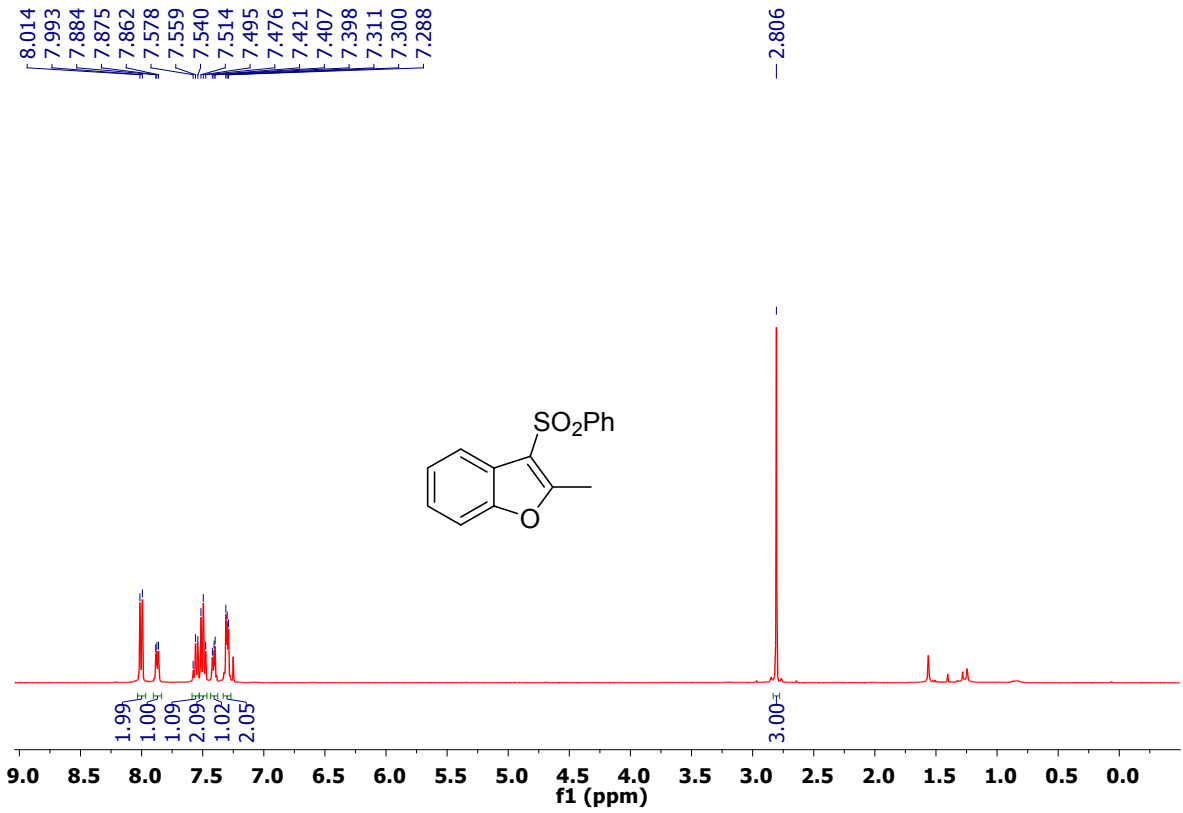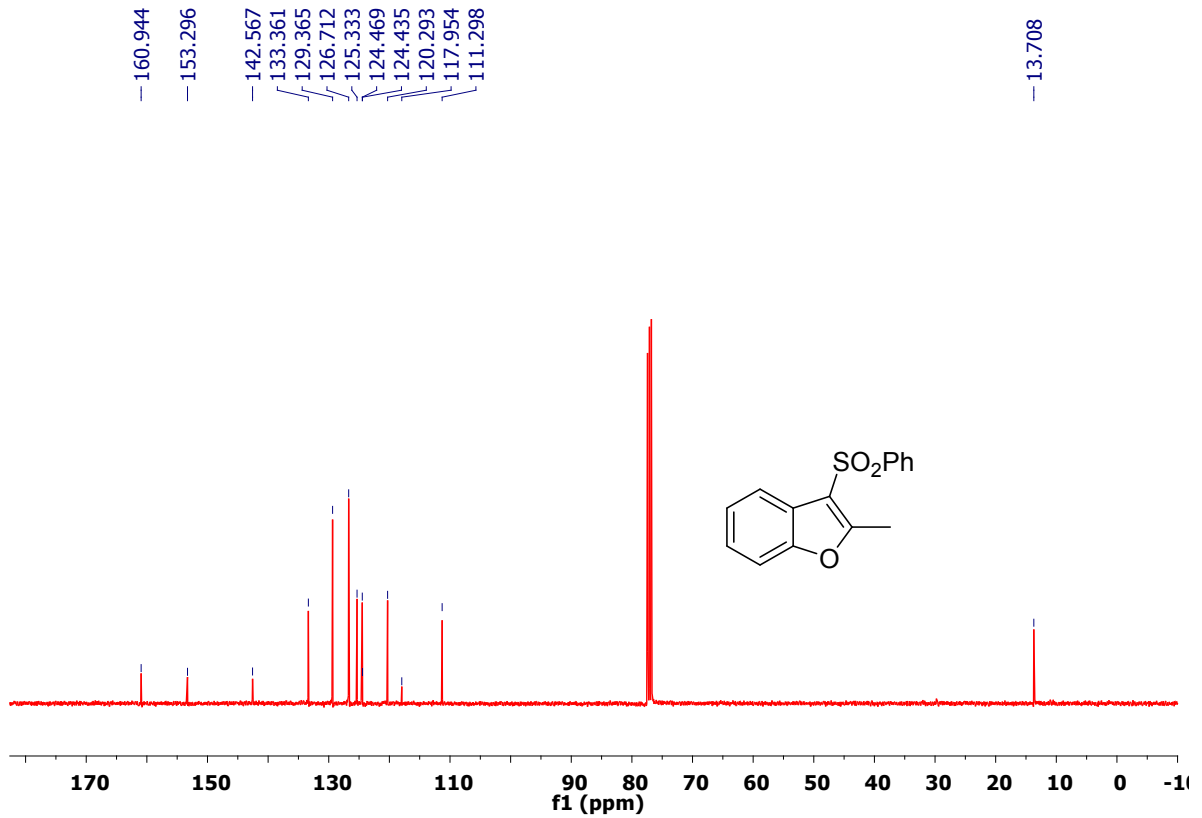

15a, CDCl<sub>3</sub>

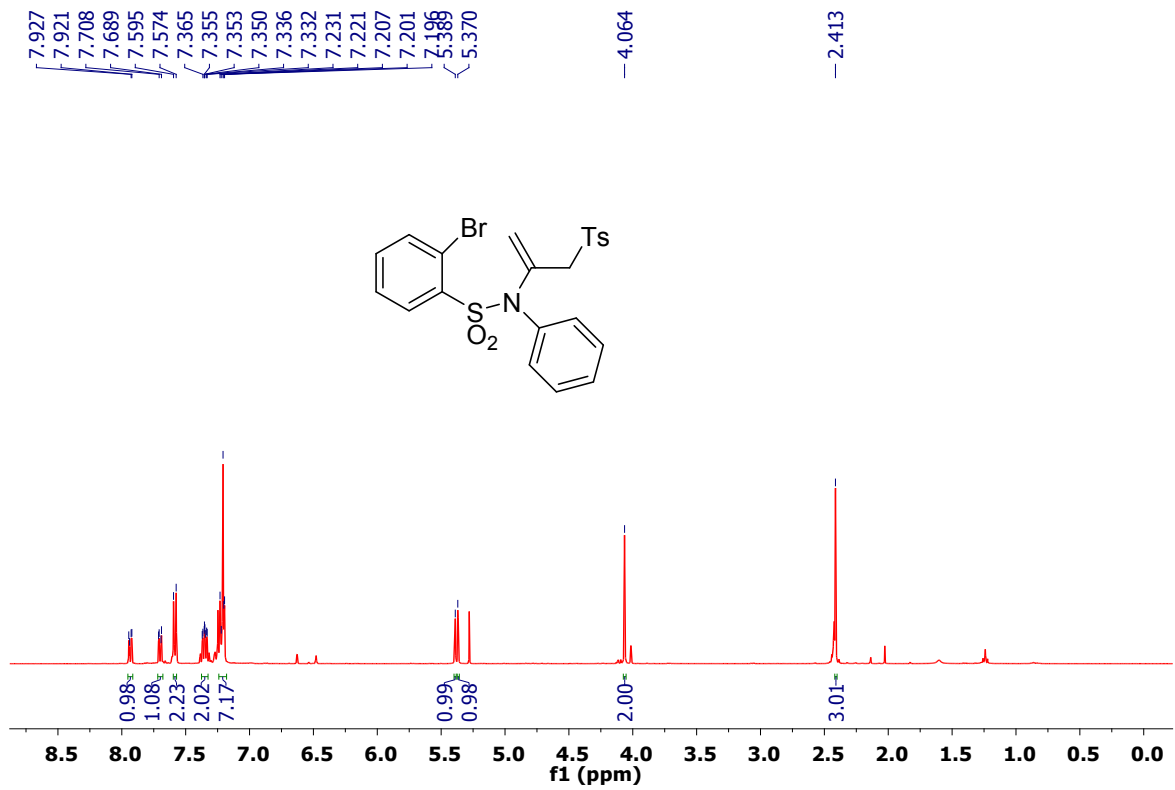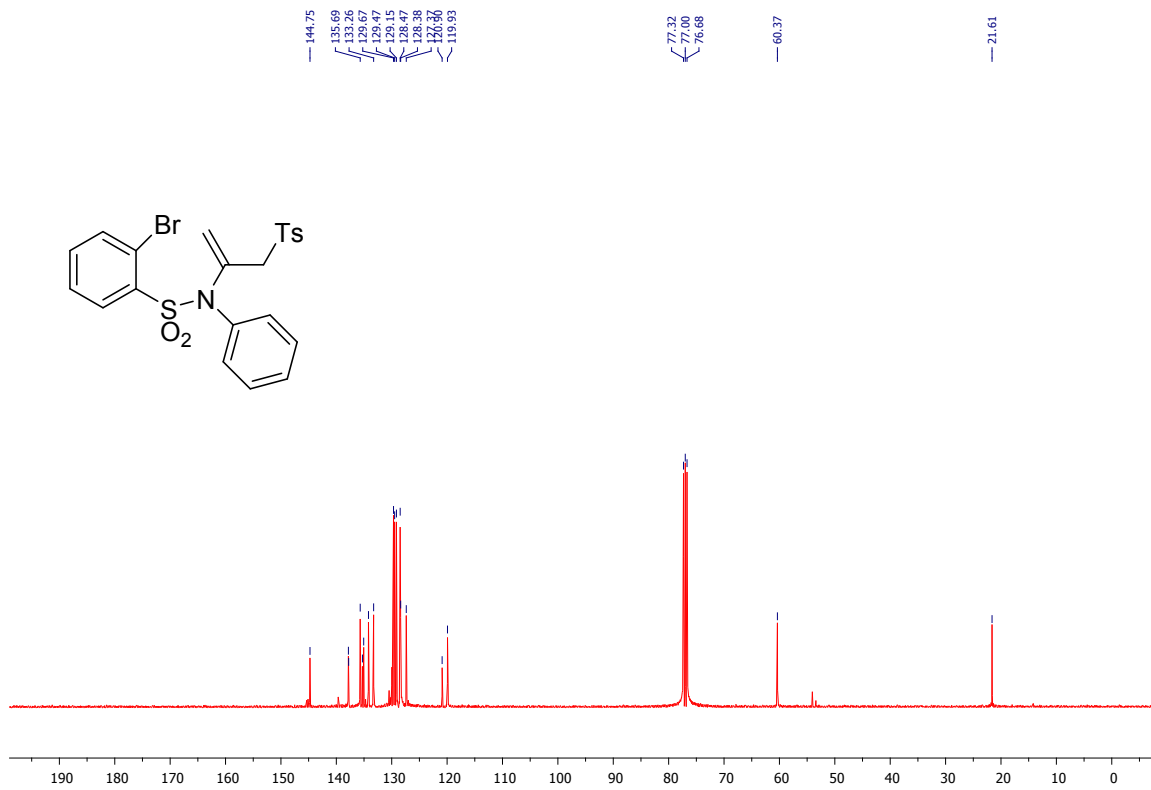

15b, CDCl<sub>3</sub>

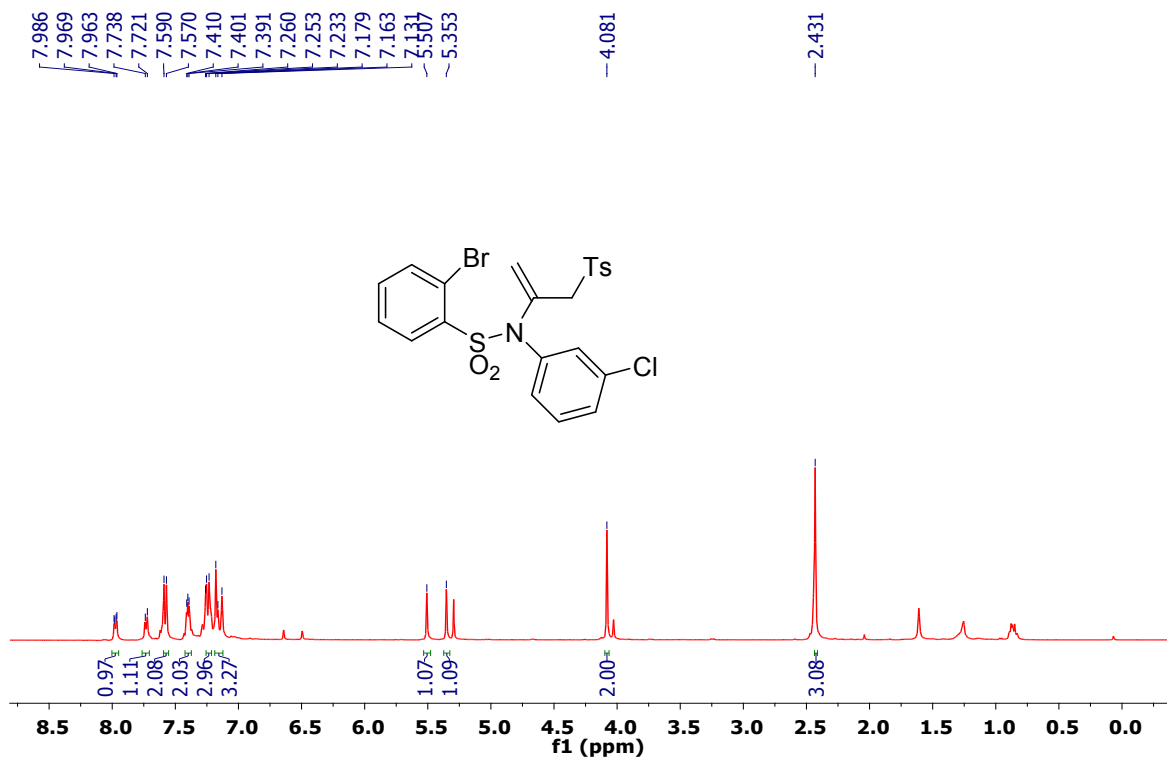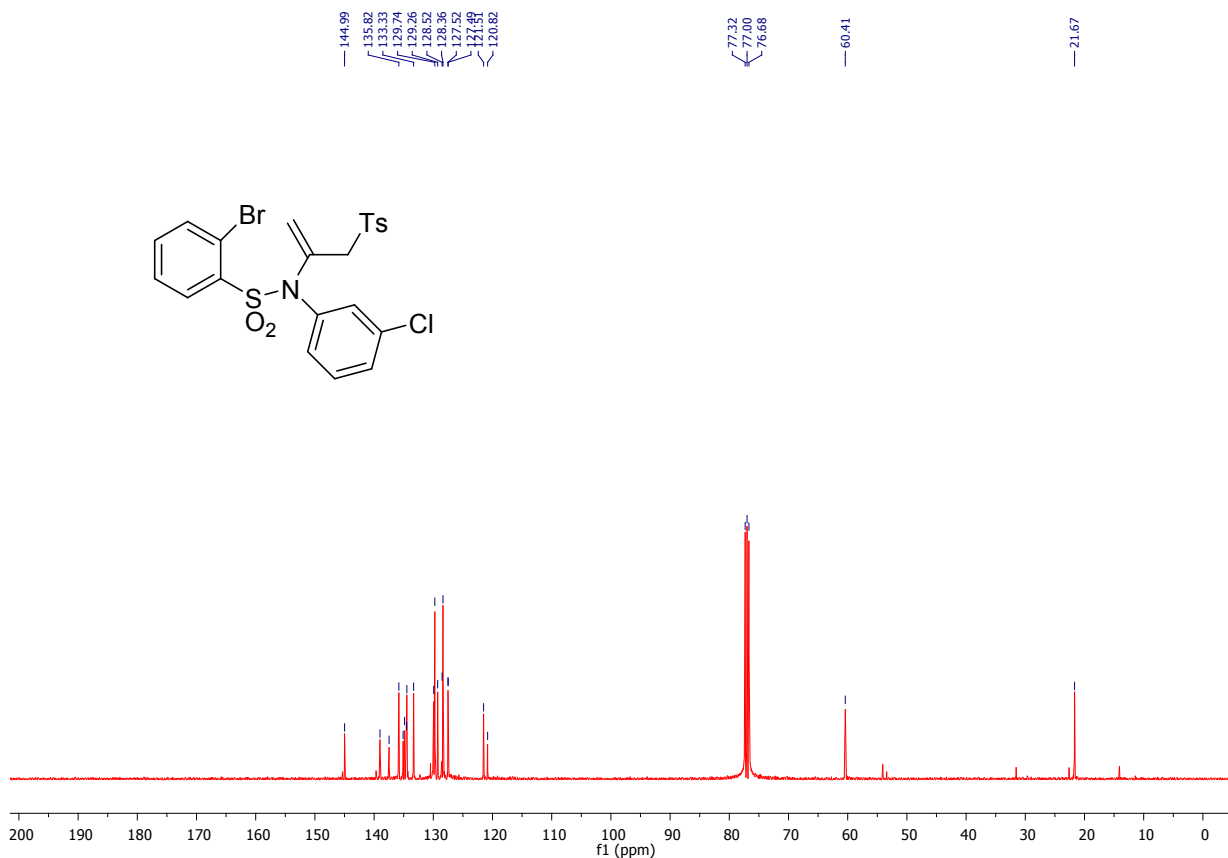

16a, CDCl<sub>3</sub>

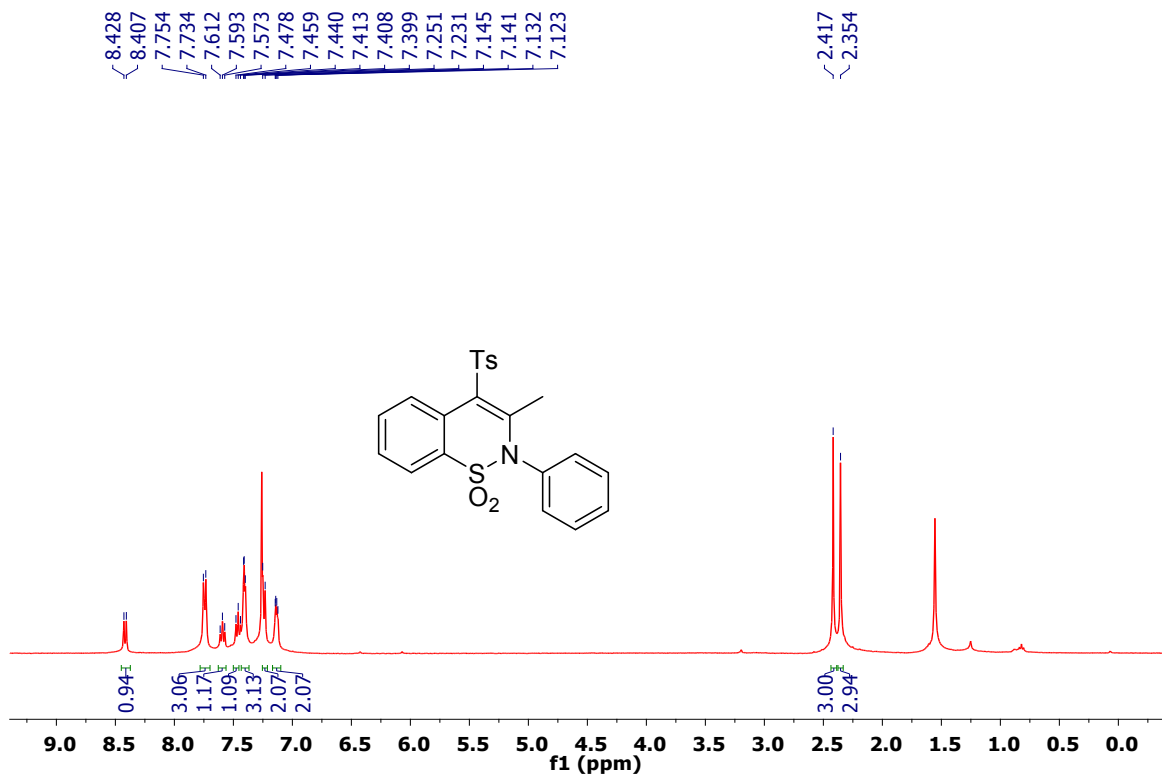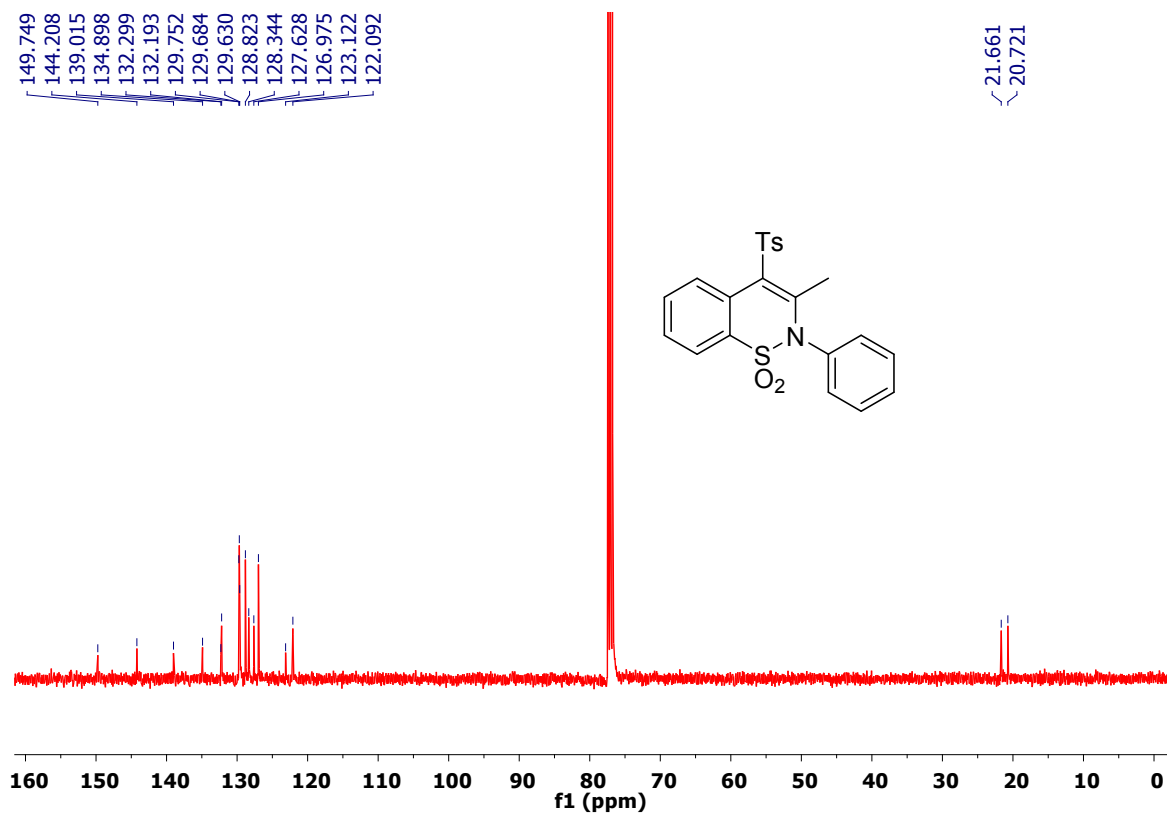

16b, CDCl<sub>3</sub>

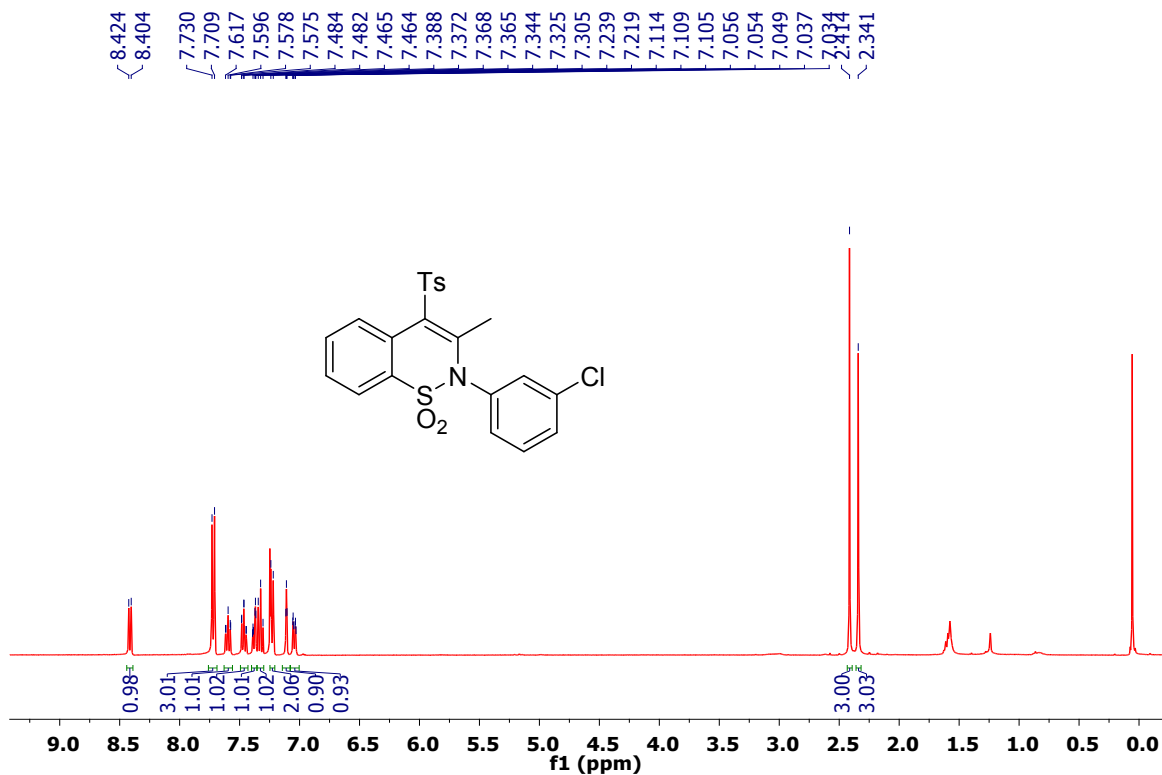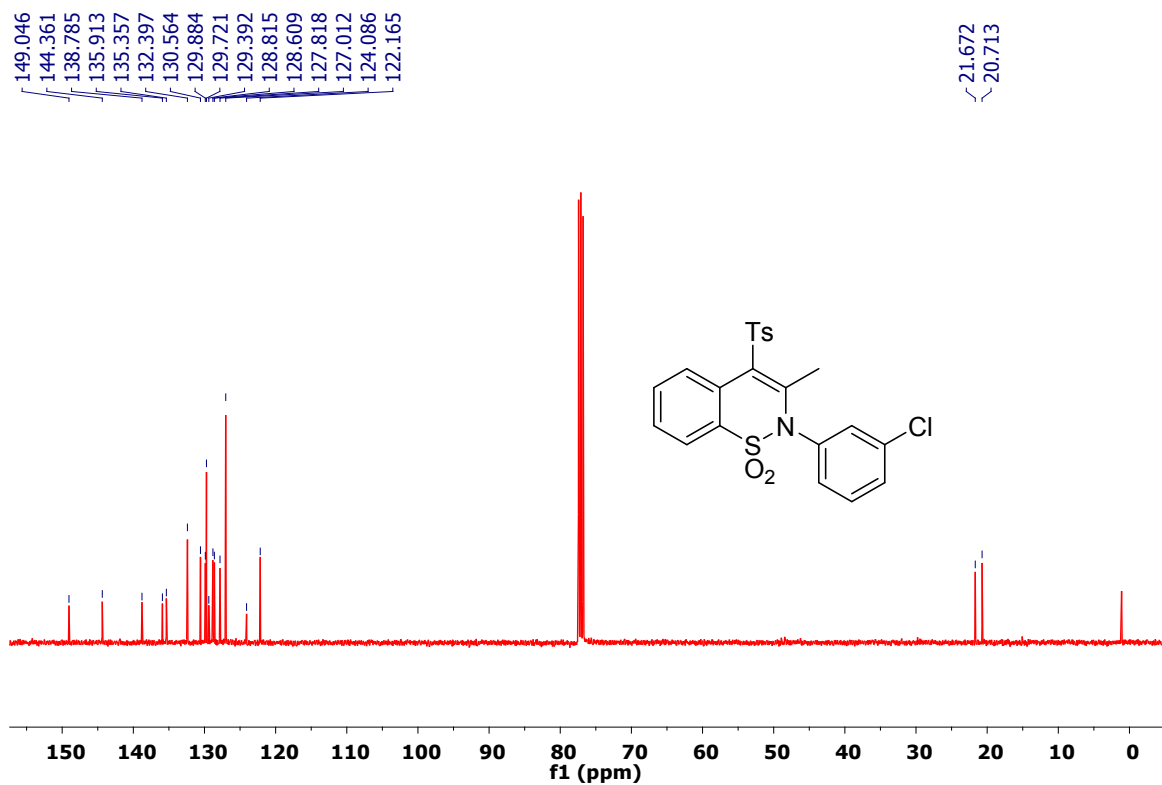

Supplement: d0ob01623c1.pdf [file d0ob01623c1.pdf]
